# Supplementary material for: Assembly of 5H-dibenzo[a,d]cycloheptenes by a formal [5 + 2] annulation of ortho-aryl alkynyl benzyl alcohols with arenes
Source: Royal Society of Chemistry journal article supplement (doi:10.1039/d2ob01335e), 2022-01-01

## Supporting Information

*for*

### **Assembly of 5*H*-dibenzo[*a,d*]cycloheptenes by a formal [5 + 2] annulation of *ortho*-aryl alkynyl benzyl alcohols with arenes**

Zhebing Zhang,<sup>a</sup> Tao Cai,<sup>\*,a,b,c</sup> Zhaohui Zhan,<sup>a</sup> Huiting Xu,<sup>a,b</sup> Lemao Yu,<sup>a</sup> Xiang Luo,<sup>a</sup> Chunmei Li,<sup>a</sup> Yuzhen Gao,<sup>d</sup> Xuemei Wei,<sup>a,b</sup> Xinzhi Chen<sup>\*,c</sup> and Runpu Shen<sup>\*,a,b</sup>

<sup>a</sup>College of Chemistry and Chemical Engineering, Shaoxing University, Shaoxing, 312000, China.

<sup>b</sup>Zhejiang Engineering Research Center of Fat-soluble Vitamin

<sup>c</sup>College of Chemical and Biological Engineering, Zhejiang University, Hangzhou, 310027, China

<sup>d</sup>Key Laboratory of Coal to Ethylene Glycol and Its Related Technology, Fujian Institute of Research on the Structure of Matter, Chinese Academy of Sciences, Fuzhou, Fujian 350002, China.

Corresponding Author

\**E-mail:* cait361@usx.edu.cn;

xzchen@zju.edu.cn;

srunpu@usx.edu.cn

## Table of Contents

|                                                                   |           |
|-------------------------------------------------------------------|-----------|
| <b>General information .....</b>                                  | <b>3</b>  |
| <b>Optimization of the Solvent.....</b>                           | <b>3</b>  |
| <b>General procedure for the synthesis of the products 3.....</b> | <b>4</b>  |
| <b>2 mmol scale synthesis of 3a .....</b>                         | <b>4</b>  |
| <b>Deuterium labeling experiments.....</b>                        | <b>5</b>  |
| <b>The spectra data of products .....</b>                         | <b>7</b>  |
| <b>Copies of the NMR spectra .....</b>                            | <b>16</b> |
| <b>Crystallographic spectrum of 3a .....</b>                      | <b>40</b> |
| <b>The HRMS spectra of the new products.....</b>                  | <b>49</b> |

## General information

All reactions were carried out under Air.  $^1\text{H}$  NMR (400 MHz) and  $^{13}\text{C}$  NMR (101 MHz) spectra were measured on Bruker AVIII 400M spectrometers with  $\text{CDCl}_3$  as solvent and tetramethylsilane (TMS) as internal standard. Chemical shifts were reported in units (ppm) by assigning TMS resonance in the  $^1\text{H}$  spectrum as 0.00 ppm and  $\text{CDCl}_3$  resonance in the  $^{13}\text{C}$  spectrum as 77.16 ppm. All coupling constants ( $J$  values) were reported in Hertz (Hz). Chemical shifts of common trace  $^1\text{H}$  NMR impurities (ppm):  $\text{H}_2\text{O}$ : 1.56,  $\text{CHCl}_3$ : 7.26. Column chromatography was performed on silica gel 300–400 mesh. The X-ray crystallographic data collections were performed on an Oxford Gemini S Ultra using graphite-monochromated Cu  $K\alpha$  radiation ( $\lambda = 1.54178 \text{ \AA}$ ). The structures were solved by direct methods, expanded by difference Fourier syntheses, and refined by full-matrix least-squares on F2 using the Bruker SHELXTL-97 and Olex 2.0 program. The unknown products were further characterized by HRMS-ESI. Unless otherwise noted, materials obtained from commercial suppliers were used without further purification.

## Optimization of the Solvent

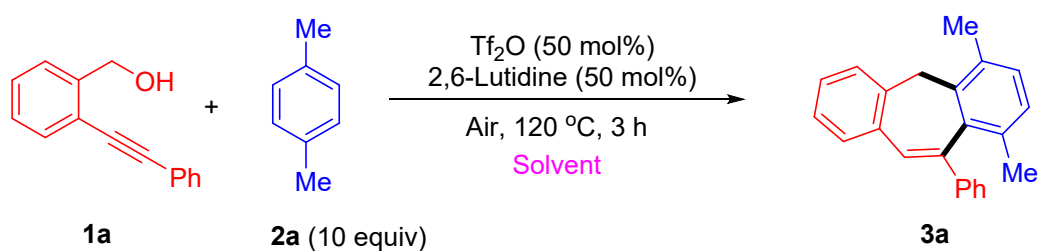

| Entry | Solvent                | Yield of <b>3a</b> (%) |
|-------|------------------------|------------------------|
| 1     | DCE                    | 12                     |
| 2     | DMF                    | 0                      |
| 3     | DMSO                   | 0                      |
| 4     | THF                    | 0                      |
| 5     | 1,4-dioxane            | 0                      |
| 6     | $\text{CH}_3\text{CN}$ | 0                      |
| 7     | $\text{CHCl}_3$        | Trace                  |

<sup>a</sup>Reaction conditions: **1a** (0.2 mmol), **2a** (2 mmol),  $\text{Tf}_2\text{O}$  (0.1 mmol), 2,6-lutidine (0.1 mmol) stirring in solvent (1 mL) under air in an oil bath at 120 °C for 3 h.

Having established  $\text{Ti}_2\text{O}$  as the most efficient catalyst and lutidine as the best base, we next turned our attention to the screening of different solvent systems, when a mixture of (2-(phenylethynyl)phenyl)methanol **1a** react with *p*-xylene **2a** in a 1:10 mole ratio was heated in different solvent systems, such as DCE, DMF, DMSO, THF, 1,4-dioxane,  $\text{CH}_3\text{CN}$ , as well as  $\text{CHCl}_3$ , with stirring at 120 °C in an oil bath for 3 hours, the results indicated that both of them were less effective than *p*-xylene.

### General procedure for the synthesis of the products **3**

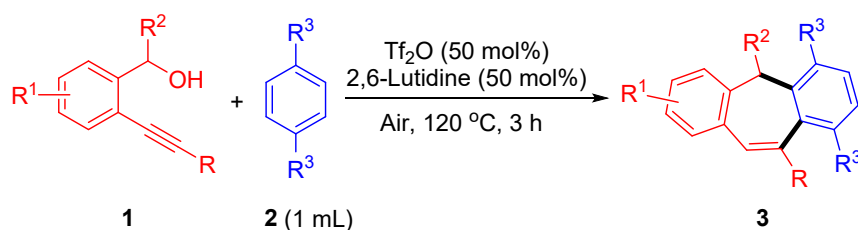

In a Schlenk tube, a mixture of *ortho*-alkynyl benzyl alcohols **1** (0.2 mmol, 1.0 equiv.), arene compounds **2** (1 mL),  $\text{Ti}_2\text{O}$  (0.1 mmol, 0.5 equiv) and 2,6-lutidine (0.1 mmol, 0.5 equiv) was heated with stirring at 120 °C in an oil bath for 3 hours. Upon completion, the reaction mixture was added  $\text{H}_2\text{O}$  (5 mL) and extracted with  $\text{Et}_2\text{OAc}$  (2 x 5 mL). The combined organic solution was dried by  $\text{Na}_2\text{SO}_4$  and the solvent was evaporated under reduced pressure. The residue was purified by silica gel column chromatography with pure PE or PE/EA=100:1(v/v) as eluent to give the corresponding products **3**.

### 2 mmol scale synthesis of **3a**

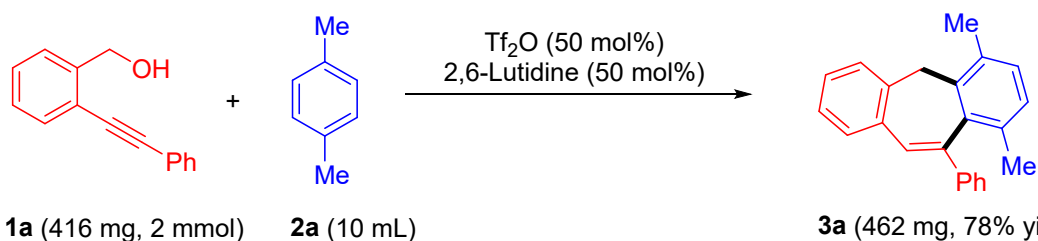

In a Schlenk tube, a mixture of (2-(phenylethynyl)phenyl)methanol **1a** (2 mmol, 1.0 equiv.), *p*-xylene **2a** (10 mL),  $\text{Ti}_2\text{O}$  (1 mmol, 0.5 equiv) and 2,6-lutidine (1 mmol, 0.5 equiv) was heated with stirring at 120 °C in an oil bath for 3 hours. Upon completion, the reaction mixture was added  $\text{H}_2\text{O}$  (25 mL) and extracted with  $\text{Et}_2\text{OAc}$  (2 x 15 mL). The combined organic solution was dried by  $\text{Na}_2\text{SO}_4$  and the solvent was evaporated under reduced pressure. The residue was purified by silica gel column chromatography with pure PE as eluent to give the corresponding products **3a** (462 mg, 78% yield).

## Deuterium labeling experiments

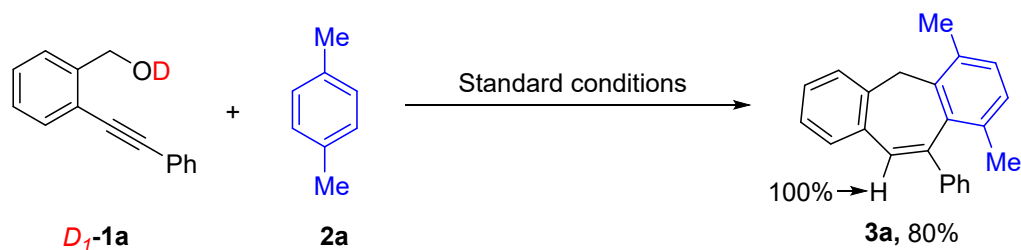

In a Schlenk tube, a mixture of deuterium labelled (2-(phenylethynyl)phenyl)methanol  $D_1\text{-1a}$  (0.2 mmol, 1.0 equiv.), *p*-xylene  $2a$  (1 mL),  $\text{TiF}_4$  (0.1 mmol, 0.5 equiv) and 2,6-lutidine (0.1 mmol, 0.5 equiv) was heated with stirring at 120 °C in an oil bath for 3 hours. Upon completion, the reaction mixture was added  $\text{H}_2\text{O}$  (5 mL) and extracted with  $\text{Et}_2\text{OAc}$  (2 x 5 mL). The combined organic solution was dried by  $\text{Na}_2\text{SO}_4$  and the solvent was evaporated under reduced pressure. The residue was purified by silica gel column chromatography with pure PE as eluent to give the corresponding products  $3a$  (47.2 mg, 80% yield).

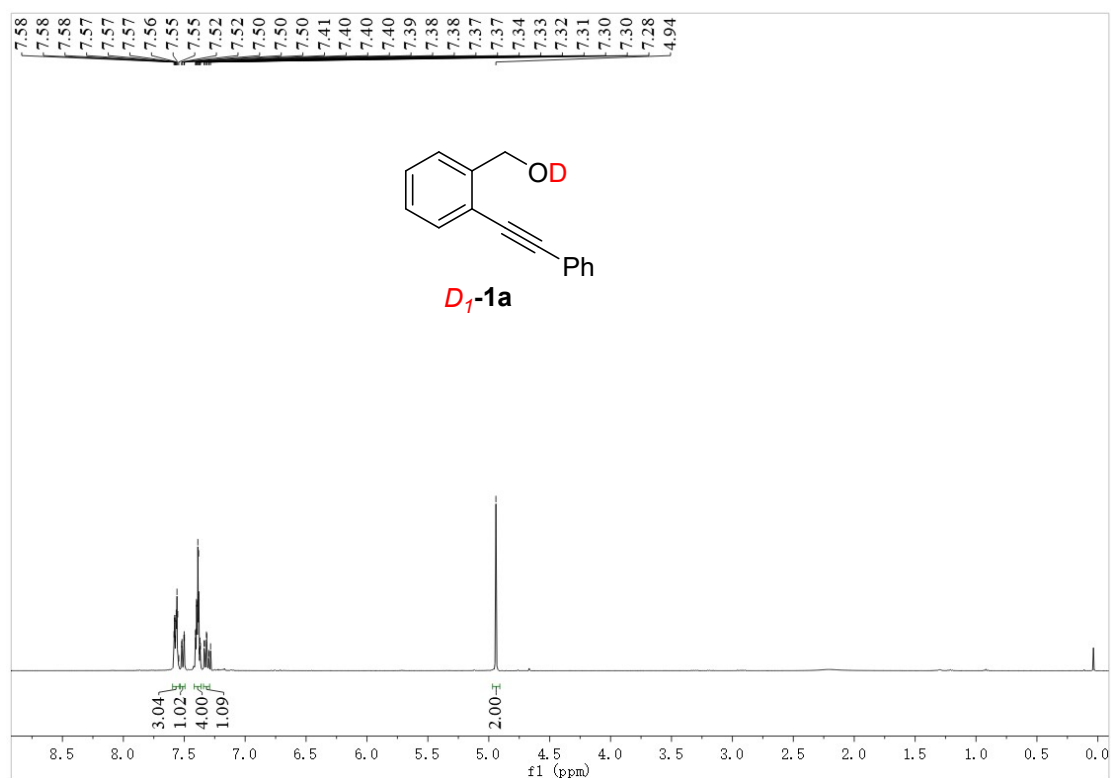

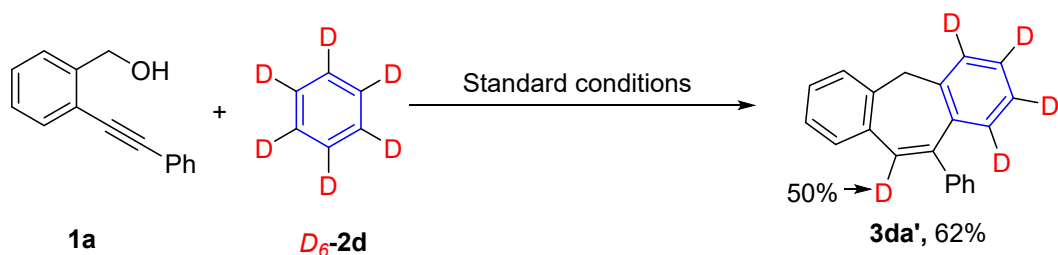

In a Schlenk tube, a mixture of (2-(phenylethynyl)phenyl)methanol **1a** (0.2 mmol, 1.0 equiv.), *D*<sub>6</sub>-benzene *D*<sub>6</sub>-**2d** (1 mL), Tf<sub>2</sub>O (0.1 mmol, 0.5 equiv) and 2,6-lutidine (0.1 mmol, 0.5 equiv) was heated with stirring at 120 °C in an oil bath for 3 hours. Upon completion, the reaction mixture was added H<sub>2</sub>O (5 mL) and extracted with Et<sub>2</sub>OAc (2 x 5 mL). The combined organic solution was dried by Na<sub>2</sub>SO<sub>4</sub> and the solvent was evaporated under reduced pressure. The residue was purified by silica gel column chromatography with pure PE as eluent to give the corresponding products **3da'** in 62% yield.

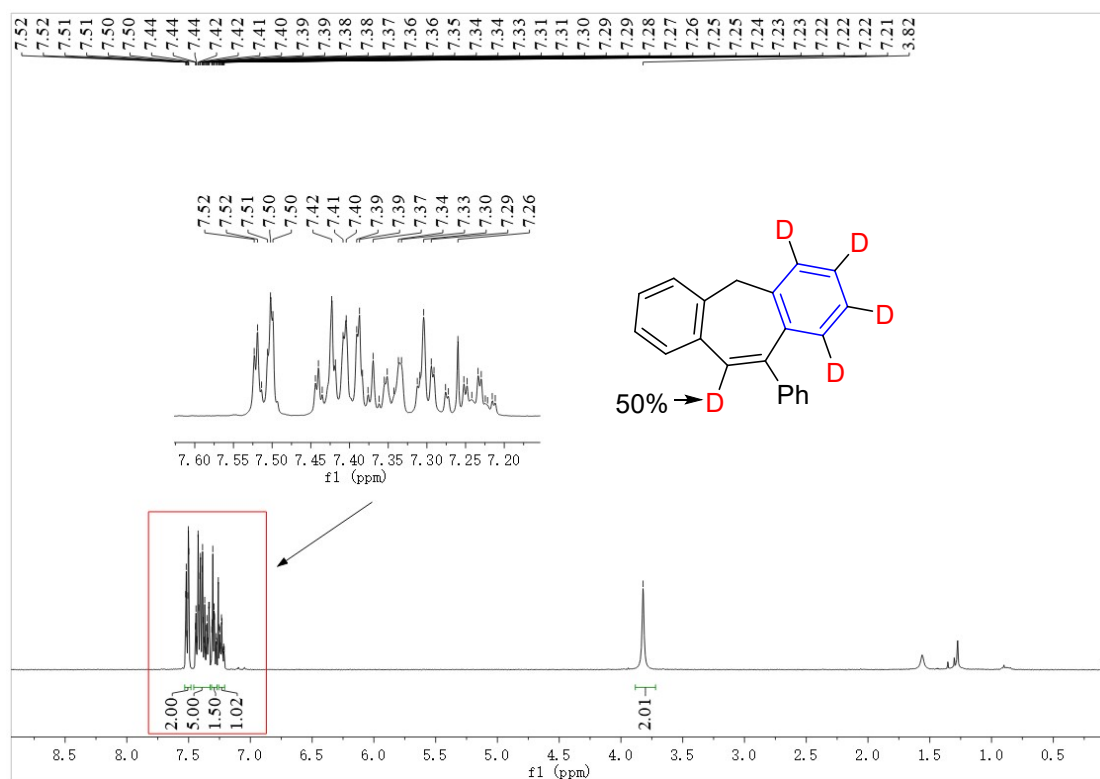

## The spectra data of products

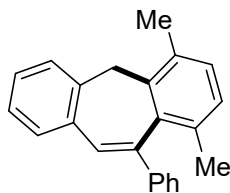

### 1,4-dimethyl-11-phenyl-5H-dibenzo[a,d][7]annulene (3a)

Flash chromatography of the crude reaction product (petroleum ether) gave a white solid (48.0mg, 81%). mp 78-80 °C. **<sup>1</sup>H NMR (400 MHz, CDCl<sub>3</sub>)** δ 7.58 (s, 1H), 7.56 – 7.42 (m, 6H), 7.41 – 7.27 (m, 3H), 7.18 (d, *J* = 7.6 Hz, 1H), 6.93 (d, *J* = 7.6 Hz, 1H), 4.24 (d, *J* = 12.8 Hz, 1H), 3.48 (d, *J* = 12.8 Hz, 1H), 2.68 (s, 3H), 1.84 (s, 3H); **<sup>13</sup>C NMR (101 MHz, CDCl<sub>3</sub>)** δ 144.6, 144.5, 141.4, 141.3, 135.8, 134.8, 134.5, 130.9, 130.7, 129.9, 128.7, 128.6, 128.1, 127.7, 127.2, 127.0, 126.7, 125.9, 35.9, 22.6, 20.7; **HRMS** Calcd for C<sub>23</sub>H<sub>21</sub><sup>+</sup> [M+H]<sup>+</sup> 297.1638, found 297.1629.

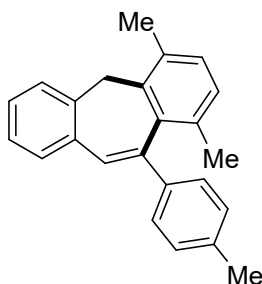

### 1,4-dimethyl-11-(*p*-tolyl)-5H-dibenzo[a,d][7]annulene (3b)

Flash chromatography of the crude reaction product (petroleum ether) gave a white solid (46.5mg, 75%). mp 79-81 °C. **<sup>1</sup>H NMR (400 MHz, CDCl<sub>3</sub>)** δ 7.51 (s, 1H), 7.46 – 7.33 (m, 4H), 7.29 – 7.20 (m, 4H), 7.12 (d, *J* = 7.5 Hz, 1H), 6.87 (d, *J* = 7.5 Hz, 1H), 4.18 (d, *J* = 12.8 Hz, 1H), 3.41 (d, *J* = 12.8 Hz, 1H), 2.63 (s, 3H), 2.44 (s, 3H), 1.79 (s, 3H); **<sup>13</sup>C NMR (101 MHz, CDCl<sub>3</sub>)** δ 144.3, 141.5, 141.3, 141.2, 136.7, 135.8, 134.8, 134.5, 130.5, 130.1, 129.8, 129.3, 128.5, 128.0, 127.5, 126.9, 126.6, 125.8, 35.8, 22.5, 21.2, 20.6; **HRMS** Calcd for C<sub>24</sub>H<sub>23</sub><sup>+</sup> [M+H]<sup>+</sup> 311.1794, found 311.1792.

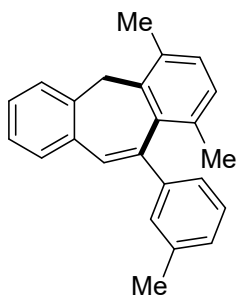

### 1,4-dimethyl-11-(*m*-tolyl)-5H-dibenzo[a,d][7]annulene (3c)

Flash chromatography of the crude reaction product (petroleum ether) gave a white solid (47.1mg, 76%). mp 83-85 °C. **<sup>1</sup>H NMR (400 MHz, CDCl<sub>3</sub>)** δ 7.53 (s, 1H), 7.45 (dd, *J* = 6.8, 2.3 Hz, 1H), 7.43 – 7.38 (m, 1H), 7.35 – 7.23 (m, 5H), 7.19 – 7.15 (m, 1H), 7.14 (d, *J* = 7.6 Hz, 1H), 6.89 (d, *J* = 7.6 Hz, 1H), 4.19 (d, *J* = 12.8 Hz, 1H), 3.42 (d, *J* = 12.8 Hz, 1H), 2.65 (s, 3H), 2.44 (s, 3H), 1.81 (s, 3H); **<sup>13</sup>C NMR (101 MHz, CDCl<sub>3</sub>)** δ 144.6, 144.4, 141.3, 141.2, 138.2, 135.8, 134.8, 134.5,

130.8, 130.5, 129.8, 128.6, 128.5, 128.1, 127.7, 127.7, 127.6, 126.6, 125.9, 124.3, 35.8, 22.6, 21.6, 20.7; **HRMS** Calcd for  $C_{24}H_{23}^+$   $[M+H]^+$  311.1794, found 311.1791.

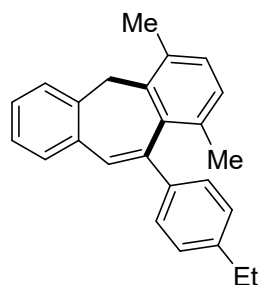

**11-(4-ethylphenyl)-1,4-dimethyl-5H-dibenzo[a,d][7]annulene (3d)**

Flash chromatography of the crude reaction product (petroleum ether) gave a white solid (53.1mg, 82%). mp 84-86 °C. **<sup>1</sup>H NMR (400 MHz, CDCl<sub>3</sub>)** δ 7.53 (s, 1H), 7.49 – 7.36 (m, 4H), 7.34 – 7.21 (m, 4H), 7.14 (d,  $J = 7.7$  Hz, 1H), 6.89 (d,  $J = 7.7$  Hz, 1H), 4.19 (d,  $J = 12.7$  Hz, 1H), 3.43 (d,  $J = 12.7$  Hz, 1H), 2.75 (q,  $J = 7.6$  Hz, 2H), 2.65 (s, 3H), 1.80 (s, 3H), 1.34 (t,  $J = 7.6$  Hz, 3H); **<sup>13</sup>C NMR (101 MHz, CDCl<sub>3</sub>)** δ 144.4, 143.1, 141.8, 141.3, 141.2, 135.8, 134.9, 134.5, 130.5, 130.2, 129.8, 128.5, 128.1, 128.0, 127.5, 127.0, 126.6, 125.9, 35.8, 28.6, 22.6, 20.7, 15.7; **HRMS** Calcd for  $C_{25}H_{25}^+$   $[M+H]^+$  325.1951, found 325.1954.

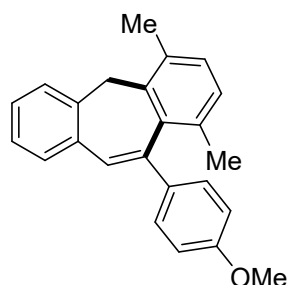

**11-(4-methoxyphenyl)-1,4-dimethyl-5H-dibenzo[a,d][7]annulene (3e)**

Flash chromatography of the crude reaction product (petroleum ether/EA=100:1) gave a white solid (45.6mg, 70%). mp 78-80 °C. **<sup>1</sup>H NMR (400 MHz, CDCl<sub>3</sub>)** δ 7.45 (s, 1H), 7.43 – 7.32 (m, 4H), 7.29 – 7.18 (m, 2H), 7.10 (d,  $J = 7.6$  Hz, 1H), 6.99 – 6.90 (m, 2H), 6.86 (d,  $J = 7.6$  Hz, 1H), 4.16 (d,  $J = 12.7$  Hz, 1H), 3.88 (s, 3H), 3.38 (d,  $J = 12.7$  Hz, 1H), 2.62 (s, 3H), 1.78 (s, 3H); **<sup>13</sup>C NMR (101 MHz, CDCl<sub>3</sub>)** δ 158.7, 143.9, 141.2, 141.1, 137.1, 135.8, 134.8, 134.5, 130.5, 129.7, 129.5, 128.5, 128.1, 127.9, 127.4, 126.6, 125.8, 113.9, 55.3, 35.8, 22.5, 20.6; **HRMS** Calcd for  $C_{24}H_{23}O^+$   $[M+H]^+$  327.1743, found 327.1739.

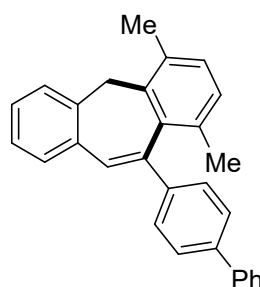

**11-([1,1'-biphenyl]-4-yl)-1,4-dimethyl-5H-dibenzo[a,d][7]annulene (3f)**

Flash chromatography of the crude reaction product (petroleum ether) gave a white solid (63.2mg, 85%). mp 88-90 °C. **<sup>1</sup>H NMR (400 MHz, CDCl<sub>3</sub>)** δ 7.66 – 7.56 (m, 4H), 7.53 (s, 1H), 7.51 – 7.42 (m, 4H), 7.41 – 7.39 (m, 1H), 7.37 – 7.33 (m, 2H), 7.25 – 7.19 (m, 2H), 7.08 (d, *J* = 7.5 Hz, 1H), 6.84 (d, *J* = 7.5 Hz, 1H), 4.14 (d, *J* = 12.8 Hz, 1H), 3.37 (d, *J* = 12.8 Hz, 1H), 2.59 (s, 3H), 1.78 (s, 3H); **<sup>13</sup>C NMR (101 MHz, CDCl<sub>3</sub>)** δ 143.9, 143.3, 141.3, 141.2, 140.7, 139.7, 135.6, 134.6, 134.4, 130.7, 130.6, 129.9, 128.8, 128.6, 128.1, 127.6, 127.4, 127.3, 126.9, 126.7, 125.9, 35.8, 22.6, 20.6; **HRMS** Calcd for C<sub>29</sub>H<sub>25</sub><sup>+</sup> [M+H]<sup>+</sup> 373.1951, found 373.1938.

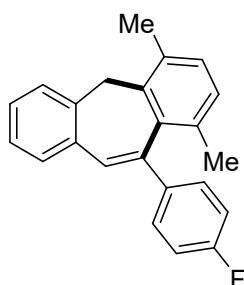

**11-(4-fluorophenyl)-1,4-dimethyl-5H-dibenzo[*a,d*][7]annulene (3g)**

Flash chromatography of the crude reaction product (petroleum ether) gave a white solid (46.5mg, 74%). mp 78-80 °C. **<sup>1</sup>H NMR (400 MHz, CDCl<sub>3</sub>)** δ 7.46 (s, 1H), 7.43 – 7.38 (m, 4H), 7.30 – 7.23 (m, 2H), 7.17 – 7.01 (m, 3H), 6.87 (d, *J* = 7.7 Hz, 1H), 4.18 (d, *J* = 12.8 Hz, 1H), 3.38 (d, *J* = 12.8 Hz, 1H), 2.62 (s, 3H), 1.76 (s, 3H); **<sup>13</sup>C NMR (101 MHz, CDCl<sub>3</sub>)** δ 161.9 (d, <sup>1</sup>*J* = 245.8 Hz), 143.4, 141.3, 141.1, 140.5 (d, <sup>4</sup>*J* = 3.4 Hz), 135.5, 134.5, 134.3, 130.7, 130.6, 130.0, 128.7, 128.6 (d, <sup>3</sup>*J* = 7.8 Hz), 128.0, 127.7, 126.7, 125.9, 115.5 (d, <sup>2</sup>*J* = 21.3 Hz), 35.8, 22.5, 20.6; **<sup>19</sup>F NMR (376 MHz, CDCl<sub>3</sub>)** δ -115.63; **HRMS** Calcd for C<sub>23</sub>H<sub>20</sub>F<sup>+</sup> [M+H]<sup>+</sup> 315.1544, found 315.1546.

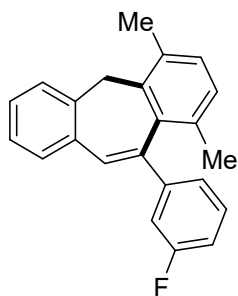

**11-(3-fluorophenyl)-1,4-dimethyl-5H-dibenzo[*a,d*][7]annulene (3h)**

Flash chromatography of the crude reaction product (petroleum ether) gave a white solid (47.1mg, 75%). mp 78-80 °C. **<sup>1</sup>H NMR (400 MHz, CDCl<sub>3</sub>)** δ 7.47 (s, 1H), 7.41 – 7.28 (m, 3H), 7.25 – 7.16 (m, 3H), 7.13 (dt, *J* = 8.6, 2.5 Hz, 1H), 7.08 (d, *J* = 7.6 Hz, 1H), 6.98 (td, *J* = 8.6, 2.5 Hz, 1H), 6.83 (d, *J* = 7.6 Hz, 1H), 4.13 (d, *J* = 12.8 Hz, 1H), 3.34 (d, *J* = 12.8 Hz, 1H), 2.58 (s, 3H), 1.74 (s, 3H); **<sup>13</sup>C NMR (101 MHz, CDCl<sub>3</sub>)** δ 163.2 (d, <sup>1</sup>*J* = 245.7 Hz), 146.7 (d, <sup>3</sup>*J* = 7.4 Hz), 143.3 (d, <sup>4</sup>*J* = 2.5 Hz), 141.4, 141.2, 135.3, 134.2 (d, *J* = 8.2 Hz), 131.5, 130.7, 130.1, 129.9, 128.6, 128.1, 127.8, 126.7, 125.9, 122.7 (d, <sup>4</sup>*J* = 2.8 Hz), 113.8 (d, <sup>2</sup>*J* = 22.0 Hz), 113.7 (d, <sup>2</sup>*J* = 21.4 Hz), 35.7, 22.4, 20.6 (one aryl carbon overlapped); **<sup>19</sup>F NMR (376 MHz, CDCl<sub>3</sub>)** δ -113.42; **HRMS** Calcd for C<sub>23</sub>H<sub>20</sub>F<sup>+</sup> [M+H]<sup>+</sup> 315.1544, found 315.1550.

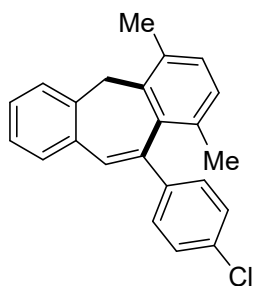

**11-(4-chlorophenyl)-1,4-dimethyl-5H-dibenzo[*a,d*][7]annulene (3i)**

Flash chromatography of the crude reaction product (petroleum ether) gave a white solid (51.5mg, 78%). mp 91-93 °C. <sup>1</sup>H NMR (400 MHz, CDCl<sub>3</sub>) δ 7.45 (s, 1H), 7.41 – 7.30 (m, 6H), 7.27 – 7.20 (m, 2H), 7.09 (d, *J* = 7.6 Hz, 1H), 6.84 (d, *J* = 7.6 Hz, 1H), 4.14 (d, *J* = 12.8 Hz, 1H), 3.34 (d, *J* = 12.8 Hz, 1H), 2.59 (s, 3H), 1.74 (s, 3H); <sup>13</sup>C NMR (101 MHz, CDCl<sub>3</sub>) δ 143.2, 142.8, 141.4, 141.2, 135.4, 134.3, 134.2, 132.7, 131.1, 130.7, 130.0, 128.8, 128.7, 128.3, 128.1, 127.8, 126.7, 125.9, 35.7, 22.6, 20.6; HRMS Calcd for C<sub>23</sub>H<sub>20</sub>Cl<sup>+</sup> [M+H]<sup>+</sup> 331.1248, found 331.1244.

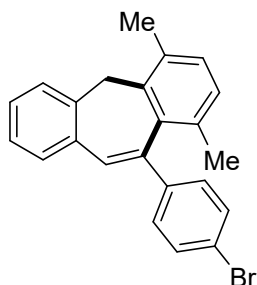

**11-(4-bromophenyl)-1,4-dimethyl-5H-dibenzo[*a,d*][7]annulene (3j)**

Flash chromatography of the crude reaction product (petroleum ether) gave a white solid (53.8mg, 72%). mp 98-100 °C. <sup>1</sup>H NMR (400 MHz, CDCl<sub>3</sub>) δ 7.48 (d, *J* = 8.2 Hz, 2H), 7.44 (s, 1H), 7.36 (ddd, *J* = 7.0, 5.2, 1.7 Hz, 2H), 7.29 (d, *J* = 8.2 Hz, 2H), 7.22 (ddd, *J* = 7.0, 5.2, 1.7 Hz, 2H), 7.08 (d, *J* = 7.6 Hz, 1H), 6.82 (d, *J* = 7.6 Hz, 1H), 4.13 (d, *J* = 12.8 Hz, 1H), 3.32 (d, *J* = 12.8 Hz, 1H), 2.57 (s, 3H), 1.73 (s, 3H); <sup>13</sup>C NMR (101 MHz, CDCl<sub>3</sub>) δ 143.3, 143.2, 141.4, 141.1, 135.4, 134.2, 134.1, 131.7, 131.1, 130.7, 130.0, 128.6, 128.0, 127.8, 126.7, 125.9, 120.8, 35.7, 22.6, 20.6 (one aryl carbon overlapped); HRMS Calcd for C<sub>23</sub>H<sub>20</sub>Br<sup>+</sup> [M+H]<sup>+</sup> 375.0743, found 375.0737.

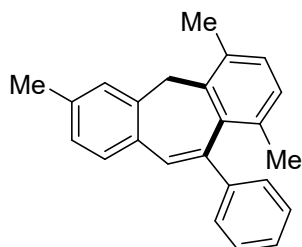

**1,4,7-trimethyl-11-phenyl-5H-dibenzo[*a,d*][7]annulene (3k)**

Flash chromatography of the crude reaction product (petroleum ether) gave a white solid (43.4mg, 70%). mp 78-80 °C. <sup>1</sup>H NMR (400 MHz, CDCl<sub>3</sub>) δ 7.44 (s, 1H), 7.42 – 7.31 (m, 4H), 7.30 – 7.23 (m, 2H), 7.15 (s, 1H), 7.08 – 6.99 (m, 2H), 6.80 (d, *J* = 7.6 Hz, 1H), 4.08 (d, *J* = 12.8 Hz, 1H), 3.33 (d, *J* = 12.8 Hz, 1H), 2.58 (s, 3H), 2.34 (s, 3H), 1.70 (s, 3H); <sup>13</sup>C NMR (101 MHz, CDCl<sub>3</sub>) δ 144.5, 143.7, 141.3, 141.1, 137.5, 134.8, 134.4, 132.9, 130.8, 130.5, 129.7, 128.6, 128.5, 127.9, 127.3,

127.0, 126.8, 126.7, 35.7, 22.5, 21.2, 20.6; **HRMS** Calcd for  $C_{24}H_{23}^+$   $[M+H]^+$  311.1794, found 311.1790.

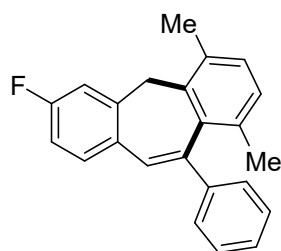

**7-fluoro-1,4-dimethyl-11-phenyl-5H-dibenzo[*a,d*][7]annulene (3l)**

Flash chromatography of the crude reaction product (petroleum ether) gave a white solid (40.8mg, 65%). mp 76-78 °C. **<sup>1</sup>H NMR (400 MHz, CDCl<sub>3</sub>)** δ 7.43 – 7.27 (m, 7H), 7.09 (d, *J* = 7.7 Hz, 1H), 7.05 (dd, *J* = 8.5, 2.6 Hz, 1H), 6.91 (td, *J* = 8.5, 2.6 Hz, 1H), 6.84 (d, *J* = 7.7 Hz, 1H), 4.09 (d, *J* = 12.8 Hz, 1H), 3.36 (d, *J* = 12.8 Hz, 1H), 2.57 (s, 3H), 1.72 (s, 3H); **<sup>13</sup>C NMR (101 MHz, CDCl<sub>3</sub>)** δ 162.6 (d, <sup>1</sup>*J* = 246.5 Hz), 144.2, 143.0 (d, <sup>3</sup>*J* = 7.3 Hz), 140.6, 134.6, 134.5, 131.7 (d, <sup>4</sup>*J* = 2.9 Hz), 130.6, 129.9, 129.8, 129.5 (d, <sup>3</sup>*J* = 8.8 Hz), 128.8, 128.6, 128.4, 127.1, 126.9, 113.4 (d, <sup>2</sup>*J* = 21.3 Hz), 112.9 (d, <sup>2</sup>*J* = 21.9 Hz), 35.7, 22.4, 20.6; **<sup>19</sup>F NMR (376 MHz, CDCl<sub>3</sub>)** δ -115.16; **HRMS** Calcd for  $C_{23}H_{20}F^+$   $[M+H]^+$  315.1544, found 315.1545.

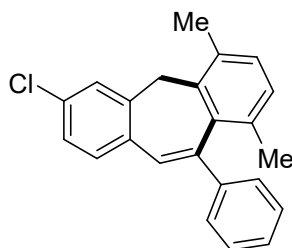

**7-chloro-1,4-dimethyl-11-phenyl-5H-dibenzo[*a,d*][7]annulene (3m)**

Flash chromatography of the crude reaction product (petroleum ether) gave a white solid (47.5mg, 72%). mp 88-90 °C. **<sup>1</sup>H NMR (400 MHz, CDCl<sub>3</sub>)** δ 7.43 – 7.33 (m, 6H), 7.31 (d, *J* = 8.2 Hz, 2H), 7.19 (dd, *J* = 8.2, 2.2 Hz, 1H), 7.11 (d, *J* = 7.6 Hz, 1H), 6.86 (d, *J* = 7.6 Hz, 1H), 4.09 (d, *J* = 12.8 Hz, 1H), 3.35 (d, *J* = 12.8 Hz, 1H), 2.59 (s, 3H), 1.73 (s, 3H); **<sup>13</sup>C NMR (101 MHz, CDCl<sub>3</sub>)** δ 145.0, 144.1, 142.5, 140.6, 134.6, 134.5, 134.1, 133.4, 130.6, 130.0, 129.6, 129.2, 128.9, 128.6, 127.1, 127.0, 126.5, 126.0, 35.5, 22.4, 20.6; **HRMS** Calcd for  $C_{23}H_{20}Cl^+$   $[M+H]^+$  331.1248, found 331.1251.

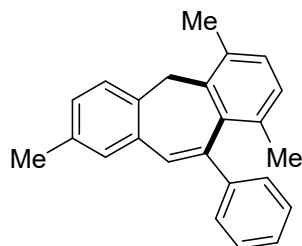

**1,4,8-trimethyl-11-phenyl-5H-dibenzo[*a,d*][7]annulene (3n)**

Flash chromatography of the crude reaction product (petroleum ether) gave a white solid (46.5mg, 75%). mp 78-80 °C. **<sup>1</sup>H NMR (400 MHz, CDCl<sub>3</sub>)** δ 7.48 – 7.42 (m, 3H), 7.39 (t, *J* = 7.7 Hz, 2H), 7.34 – 7.30 (m, 1H), 7.29 – 7.23 (m, 2H), 7.11 – 7.05 (m, 2H), 6.84 (d, *J* = 7.7 Hz, 1H), 4.13 (d, *J* = 12.8 Hz, 1H), 3.36 (d, *J* = 12.8 Hz, 1H), 2.60 (s, 3H), 2.36 (s, 3H), 1.74 (s, 3H); **<sup>13</sup>C NMR (101 MHz, CDCl<sub>3</sub>)** δ 144.5, 144.3, 141.5, 138.4, 135.5, 135.3, 134.7, 134.4, 130.9, 130.4, 129.8, 128.6, 128.5, 128.48, 128.44, 127.0, 126.8, 126.5, 35.3, 22.5, 21.0, 20.6; **HRMS** Calcd for C<sub>24</sub>H<sub>23</sub><sup>+</sup> [M+H]<sup>+</sup> 311.1794, found 311.1796.

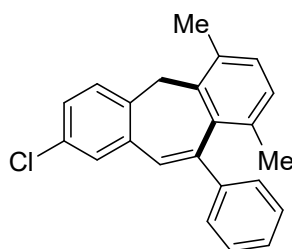

### 8-chloro-1,4-dimethyl-11-phenyl-5H-dibenzo[*a,d*][7]annulene (3o)

Flash chromatography of the crude reaction product (petroleum ether) gave a white solid (44.9mg, 68%). mp 88-90 °C. **<sup>1</sup>H NMR (400 MHz, CDCl<sub>3</sub>)** δ 7.40 – 7.32 (m, 6H), 7.31 – 7.26 (m, 1H), 7.24 (d, *J* = 2.1 Hz, 1H), 7.17 (dd, *J* = 8.2, 2.1 Hz, 1H), 7.07 (d, *J* = 7.6 Hz, 1H), 6.82 (d, *J* = 7.6 Hz, 1H), 4.09 (d, *J* = 12.9 Hz, 1H), 3.30 (d, *J* = 12.9 Hz, 1H), 2.55 (s, 3H), 1.70 (s, 3H); **<sup>13</sup>C NMR (101 MHz, CDCl<sub>3</sub>)** δ 145.7, 143.9, 140.9, 139.5, 137.1, 134.5, 134.4, 131.4, 130.5, 130.0, 129.4, 128.7, 128.6, 127.7, 127.4, 127.2, 127.0, 35.1, 22.4, 20.6 (one aryl carbon overlapped); **HRMS** Calcd for C<sub>23</sub>H<sub>20</sub>Cl<sup>+</sup> [M+H]<sup>+</sup> 331.1248, found 285.1249.

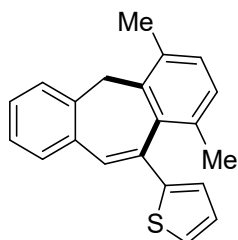

### 2-(6,9-dimethyl-5H-dibenzo[*a,d*][7]annulen-10-yl)thiophene (3p)

Flash chromatography of the crude reaction product (petroleum ether/EA=100:1) gave a white solid (48.3mg, 80%). mp 78-80 °C. **<sup>1</sup>H NMR (400 MHz, CDCl<sub>3</sub>)** δ 7.58 (s, 1H), 7.40 – 7.34 (m, 2H), 7.31 – 7.18 (m, 3H), 7.11 (d, *J* = 7.6 Hz, 1H), 7.01 (dd, *J* = 5.1, 3.6 Hz, 1H), 6.89 (d, *J* = 7.6 Hz, 1H), 6.87 (dd, *J* = 3.6, 1.1 Hz, 1H), 4.13 (d, *J* = 12.8 Hz, 1H), 3.39 (d, *J* = 12.8 Hz, 1H), 2.59 (s, 3H), 1.96 (s, 3H); **<sup>13</sup>C NMR (101 MHz, CDCl<sub>3</sub>)** δ 147.4, 141.3, 141.0, 137.6, 135.3, 134.7, 134.2, 130.5, 130.0, 129.5, 128.5, 128.1, 127.7, 127.5, 126.7, 125.9, 125.5, 124.1, 35.7, 21.9, 20.5; **HRMS** Calcd for C<sub>21</sub>H<sub>19</sub>S<sup>+</sup> [M+H]<sup>+</sup> 303.1202, found 303.1203.

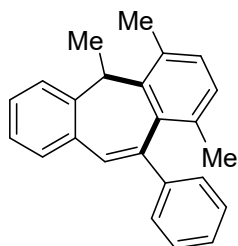

#### 1,4,5-trimethyl-11-phenyl-5H-dibenzo[*a,d*][7]annulene (3q)

Flash chromatography of the crude reaction product (petroleum ether) gave a white solid (32.2mg, 52%). mp 70-72 °C. **<sup>1</sup>H NMR (400 MHz, CDCl<sub>3</sub>)** δ 7.66 (dd, *J* = 7.7, 1.4 Hz, 1H), 7.36 – 7.29 (m, 2H), 7.27 – 7.15 (m, 6H), 7.05 (d, *J* = 7.7 Hz, 1H), 6.91 (s, 1H), 6.86 (d, *J* = 7.7 Hz, 1H), 4.29 (q, *J* = 7.2 Hz, 1H), 2.50 (s, 3H), 1.84 (s, 3H), 1.50 (d, *J* = 7.2 Hz, 3H); **<sup>13</sup>C NMR (101 MHz, CDCl<sub>3</sub>)** δ 141.7, 141.4, 138.6, 136.2, 134.4, 132.6, 131.3, 129.1, 128.6, 128.4, 128.3, 128.0, 126.9, 126.6, 126.4, 126.2, 123.4, 39.2, 21.5, 20.1, 19.0 (one aryl carbon overlapped); **HRMS** Calcd for C<sub>24</sub>H<sub>23</sub><sup>+</sup> [M+H]<sup>+</sup> 311.1794, found 311.1799.

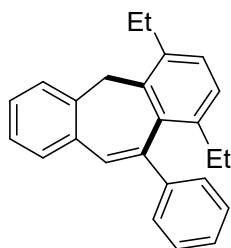

#### 1,4-diethyl-11-phenyl-5H-dibenzo[*a,d*][7]annulene (3ba)

Flash chromatography of the crude reaction product (petroleum ether) gave a white solid (45.4mg, 70%). mp 78-80 °C. **<sup>1</sup>H NMR (400 MHz, CDCl<sub>3</sub>)** δ 7.43 – 7.30 (m, 7H), 7.29 – 7.25 (m, 1H), 7.22 – 7.17 (m, 2H), 7.13 (d, *J* = 7.8 Hz, 1H), 6.92 (d, *J* = 7.8 Hz, 1H), 4.13 (d, *J* = 12.9 Hz, 1H), 3.38 (d, *J* = 12.9 Hz, 1H), 3.05 – 2.84 (m, 2H), 2.14 – 1.99 (m, 2H), 1.36 (t, *J* = 7.5 Hz, 3H), 0.78 (t, *J* = 7.5 Hz, 3H); **<sup>13</sup>C NMR (101 MHz, CDCl<sub>3</sub>)** δ 144.7, 144.5, 141.6, 141.3, 140.3, 136.6, 135.9, 134.5, 130.9, 128.5, 128.3, 127.9, 127.5, 127.4, 126.9, 126.8, 125.8, 35.2, 27.7, 26.9, 15.7, 14.1 (one aryl carbon overlapped); **HRMS** Calcd for C<sub>25</sub>H<sub>25</sub><sup>+</sup> [M+H]<sup>+</sup> 325.1951, found 325.1947.

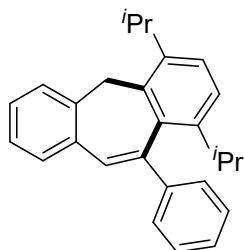

#### 1,4-diisopropyl-11-phenyl-5H-dibenzo[*a,d*][7]annulene (3ca)

Flash chromatography of the crude reaction product (petroleum ether) gave a white solid (50.7mg, 72%). mp 79-81 °C. **<sup>1</sup>H NMR (400 MHz, CDCl<sub>3</sub>)** δ 7.43 (s, 1H), 7.40 – 7.30 (m, 6H), 7.28 – 7.23 (m, 2H), 7.22 – 7.18 (m, 2H), 7.06 (d, *J* = 8.2 Hz, 1H), 4.23 (d, *J* = 13.1 Hz, 1H), 3.60 (p, *J* = 6.8 Hz, 1H), 3.38 (d, *J* = 13.1 Hz, 1H), 2.73 (p, *J* = 6.8 Hz, 1H), 1.40 (d, *J* = 6.8 Hz, 3H), 1.33 (d, *J* =

6.8 Hz, 3H), 0.84 (d,  $J = 6.8$  Hz, 3H), 0.70 (d,  $J = 6.8$  Hz, 3H);  $^{13}\text{C}$  NMR (101 MHz,  $\text{CDCl}_3$ )  $\delta$  145.1, 144.9, 144.7, 142.1, 141.0, 140.6, 136.0, 134.1, 130.7, 128.4, 127.8, 127.3, 126.9, 126.8, 126.7, 125.8, 124.9, 123.9, 34.8, 30.7, 29.5, 25.6, 24.7, 23.6, 21.9; HRMS Calcd for  $\text{C}_{27}\text{H}_{29}^+ [\text{M}+\text{H}]^+$  353.2264, found 353.2254.

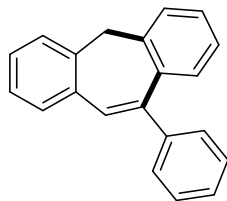

#### 10-phenyl-5H-dibenzo[*a,d*][7]annulene (3da)

Flash chromatography of the crude reaction product (petroleum ether) gave a white solid (32.2mg, 60%). mp 70-72 °C.  $^1\text{H}$  NMR (400 MHz,  $\text{CDCl}_3$ )  $\delta$  7.57 – 7.52 (m, 2H), 7.49 – 7.41 (m, 4H), 7.39 – 7.30 (m, 5H), 7.28 – 7.23 (m, 1H), 7.16 – 7.05 (m, 2H), 3.85 (s, 2H);  $^{13}\text{C}$  NMR (101 MHz,  $\text{CDCl}_3$ )  $\delta$  144.1, 143.6, 140.2, 139.3, 136.4, 135.3, 129.9, 129.5, 129.2, 128.6, 128.3, 128.1, 127.4, 127.3, 127.1, 125.9, 125.6, 41.6 (one aryl carbon overlapped); HRMS Calcd for  $\text{C}_{21}\text{H}_{17}^+ [\text{M}+\text{H}]^+$  269.1325, found 269.1312.

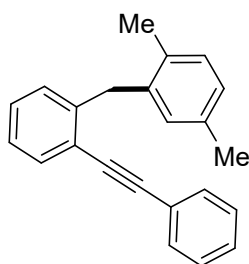

#### 1,4-dimethyl-2-(2-(phenylethynyl)benzyl)benzene (4a)

Flash chromatography of the crude reaction product (petroleum ether) gave a colorless oil.  $^1\text{H}$  NMR (400 MHz,  $\text{CDCl}_3$ )  $\delta$  7.62 – 7.58 (m, 1H), 7.56 – 7.51 (m, 2H), 7.41 – 7.36 (m, 3H), 7.29 – 7.19 (m, 2H), 7.12 (dd,  $J = 7.5, 2.0$  Hz, 1H), 7.05 – 6.92 (m, 3H), 4.25 (s, 2H), 2.32 (s, 3H), 2.25 (s, 3H);  $^{13}\text{C}$  NMR (101 MHz,  $\text{CDCl}_3$ )  $\delta$  142.6, 138.2, 135.4, 133.6, 132.0, 131.5, 130.9, 130.1, 128.6, 128.5, 128.4, 128.3, 127.1, 125.9, 123.4, 122.9, 93.8, 88.2, 37.7, 21.0, 19.2; HRMS  $\text{C}_{23}\text{H}_{21}^+ [\text{M}+\text{H}]^+$  297.1638, found 297.1627.

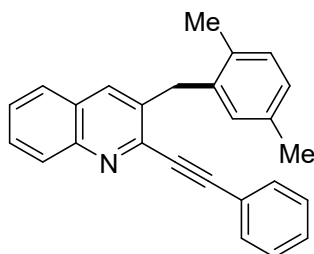

#### 3-(2,5-dimethylbenzyl)-2-(phenylethynyl)quinoline (4r)

Flash chromatography of the crude reaction product (petroleum ether/EA=100:1) gave a pale green oil.  $^1\text{H}$  NMR (400 MHz,  $\text{CDCl}_3$ )  $\delta$  8.15 (d,  $J = 8.4$  Hz, 1H), 7.73 – 7.62 (m, 4H), 7.60 (s, 1H), 7.51 (ddd,  $J = 8.4, 6.7, 1.7$  Hz, 1H), 7.41 (qd,  $J = 4.7, 1.7$  Hz, 3H), 7.17 (d,  $J = 7.6$  Hz, 1H), 7.08 (dd,  $J$

= 7.6, 1.7 Hz, 1H), 7.01 (d,  $J$  = 1.7 Hz, 1H), 4.38 (s, 2H), 2.33 (s, 3H), 2.25 (s, 3H);  **$^{13}\text{C}$  NMR (101 MHz,  $\text{CDCl}_3$ )**  $\delta$  142.6, 138.2, 135.4, 133.6, 132.0, 131.5, 130.9, 130.1, 128.6, 128.5, 128.4, 128.3, 127.1, 125.9, 123.4, 122.9, 93.8, 88.2, 37.7, 21.0, 19.2; **HRMS**  $\text{C}_{26}\text{H}_{22}\text{N}^+$   $[\text{M}+\text{H}]^+$  348.1747, found 348.1730.

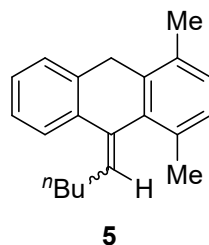

**(*E*)- and (*Z*)-1,4-dimethyl-9-pentylidene-9,10-dihydroanthracene (5)**

Flash chromatography of the crude reaction product (petroleum ether) gave a colorless oil (total: 41.4mg, 75%). The title compound was obtained as a mixture of (*E*)- and (*Z*)-isomers (major:minor = 5:3).  **$^1\text{H}$  NMR (400 MHz,  $\text{CDCl}_3$ )** (mixture)  $\delta$  8.48 (s, 1H), 8.43 (s, 0.6H), 8.33 (d,  $J$  = 8.8 Hz, 1H), 8.25 (d,  $J$  = 8.8 Hz, 0.6H), 8.05 – 8.01 (m, 1.6H), 7.91 (s, 0.6H), 7.56 – 7.44 (m, 3.2H), 7.23 – 7.13 (m, 2.6H), 3.80 (t,  $J$  = 8.5 Hz, 2H), 3.59 (t,  $J$  = 8.5 Hz, 1.2H), 3.06 (s, 3H), 2.81 (s, 1.8H), 2.78 (s, 3H), 2.57 (s, 1.8H), 1.93 – 1.76 (m, 3.2H), 1.67 – 1.54 (m, 3.2H), 1.51 – 1.41 (m, 3.2H), 0.99 (t,  $J$  = 7.2 Hz, 4.8H);  **$^{13}\text{C}$  NMR (101 MHz,  $\text{CDCl}_3$ )** (mixture)  $\delta$  137.2, 134.8, 134.7, 134.4, 133.4, 132.8, 132.7, 130.9, 130.8, 130.7, 130.0, 129.9, 129.63, 129.61, 129.4, 129.3, 128.1, 125.5, 125.3, 125.0, 124.7, 124.6, 124.33, 124.30, 123.1, 121.6, 121.2, 32.9, 32.5, 32.4, 31.1, 30.4, 28.2, 27.0, 22.7, 22.5, 20.7, 20.0, 14.2, 14.2 (one aryl carbon and one alkyl carbon overlapped); **HRMS** Calcd for  $\text{C}_{21}\text{H}_{25}^+$   $[\text{M}+\text{H}]^+$  277.1951, found 277.1950.

**3a**,  $^1\text{H}$  NMR (400 MHz,  $\text{CDCl}_3$ )

Chemical structure of **3a** is shown above the spectrum. It is a tricyclic compound consisting of a benzene ring fused to a cyclohexene ring, which is further fused to a benzene ring. The cyclohexene ring has a phenyl group (Ph) and a methyl group (Me) at the 1-position, and another methyl group (Me) at the 2-position.

Cc1cc(C)c2ccccc2C1=CC=CC=C1

Peak list (ppm): 7.58, 7.54, 7.54, 7.52, 7.51, 7.50, 7.48, 7.47, 7.46, 7.44, 7.40, 7.39, 7.38, 7.38, 7.36, 7.35, 7.33, 7.33, 7.32, 7.32, 7.31, 7.31, 7.30, 7.26, 7.19, 7.17, 6.93, 6.92, 4.25, 4.22, 3.49, 3.46, 3.46, 1.84.

Integration values: 1.00, 6.00, 3.04, 1.00, 1.00, 1.00, 1.00, 3.01, 3.00.

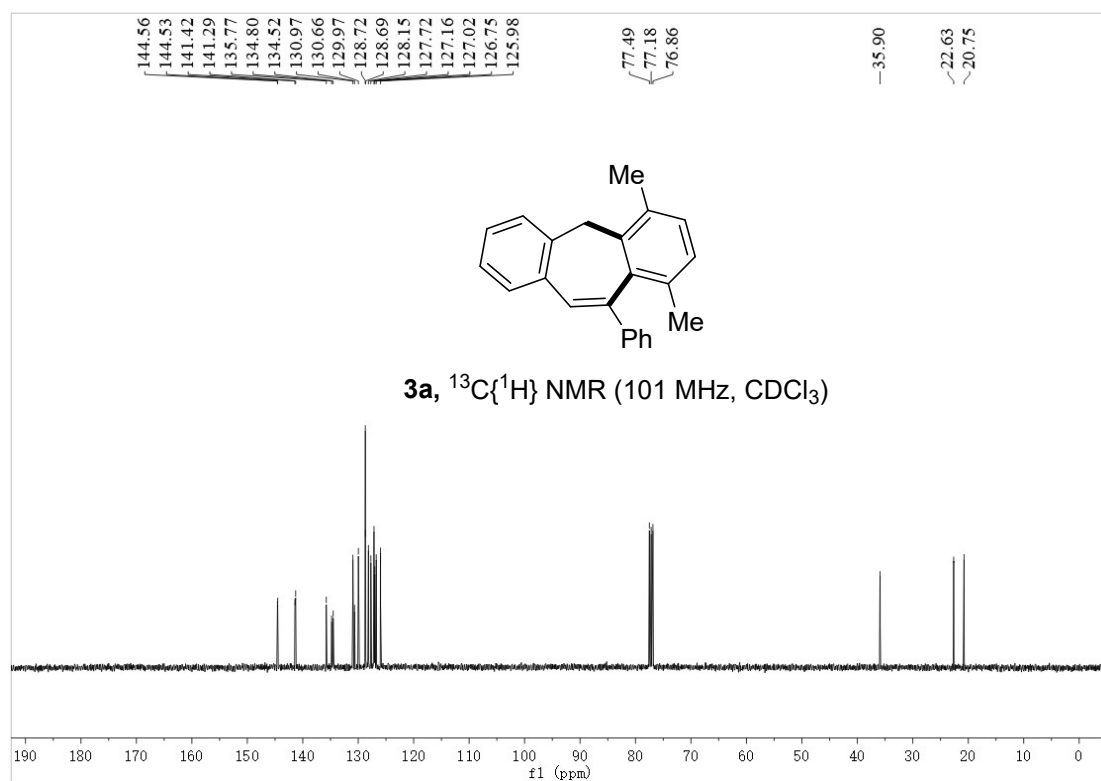

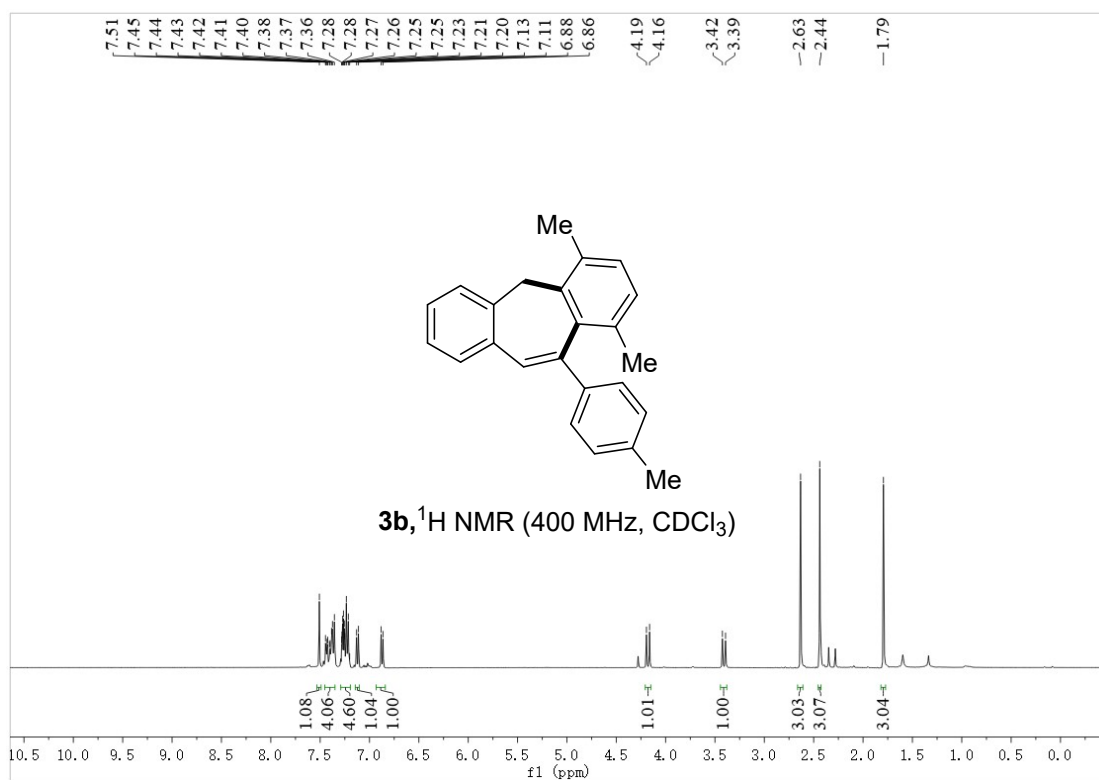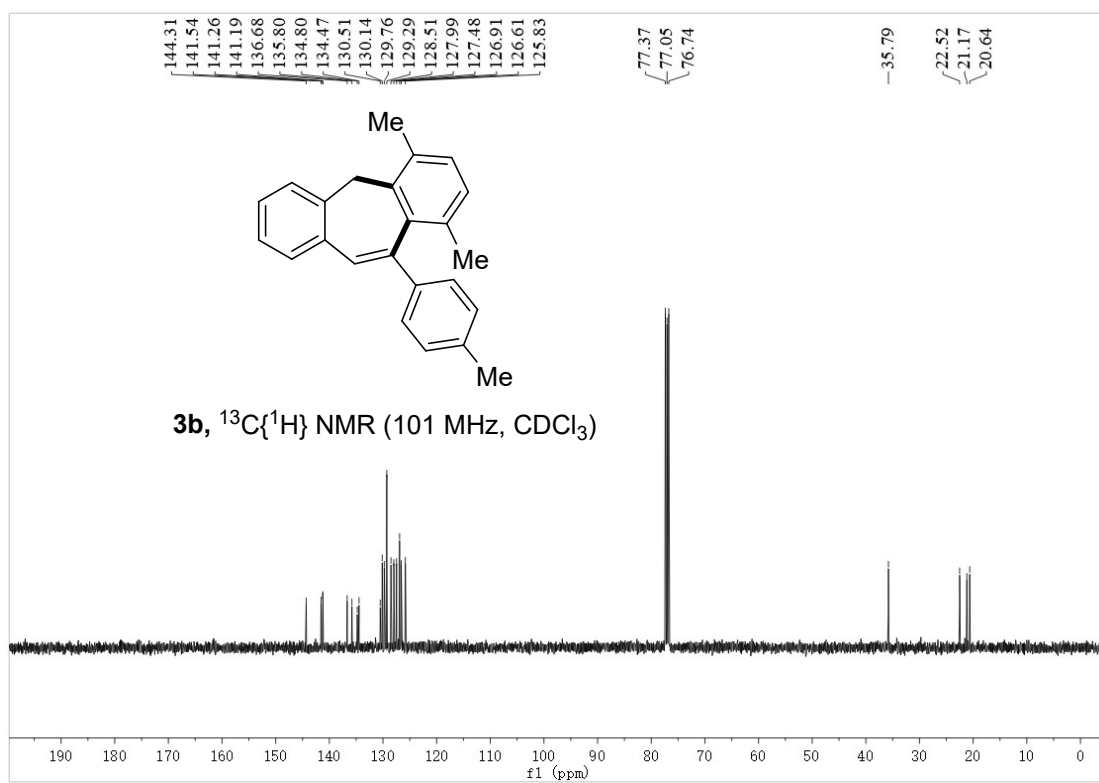

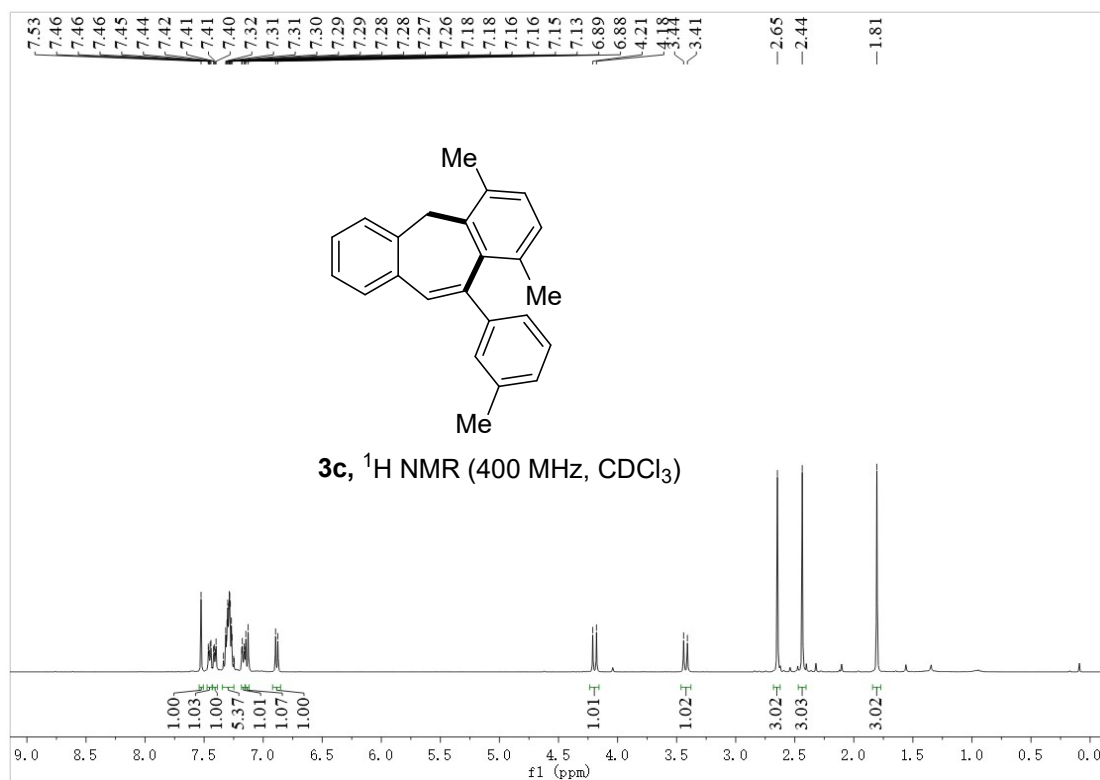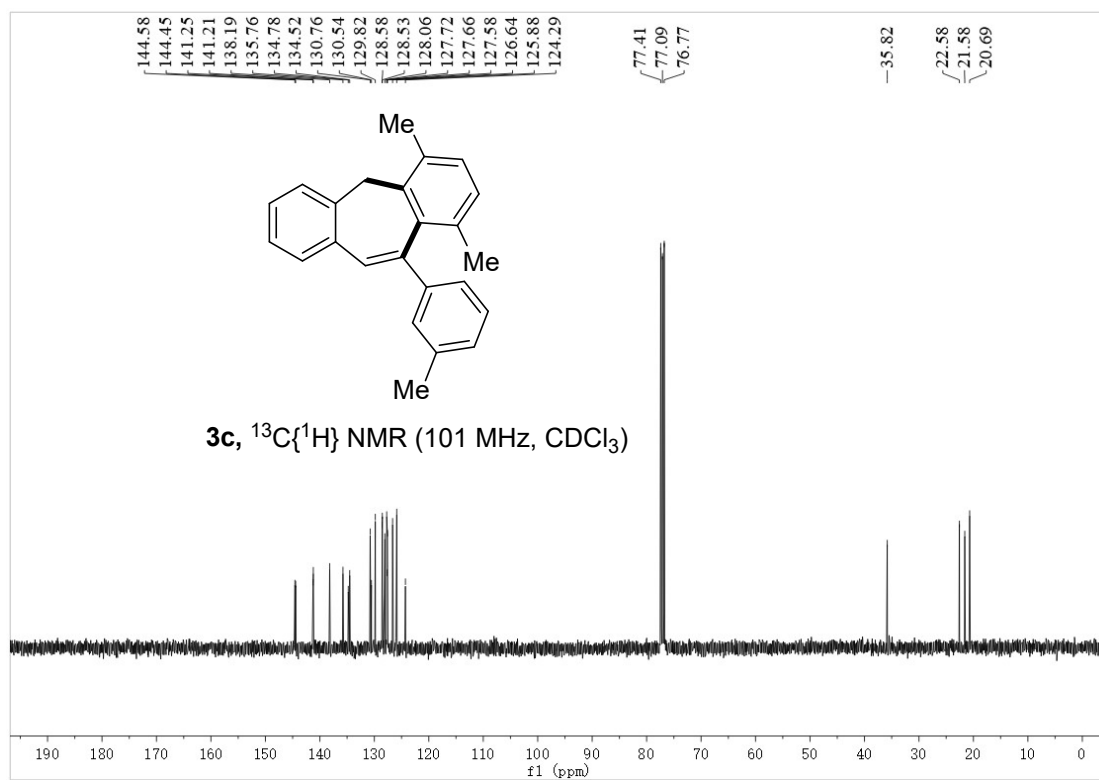

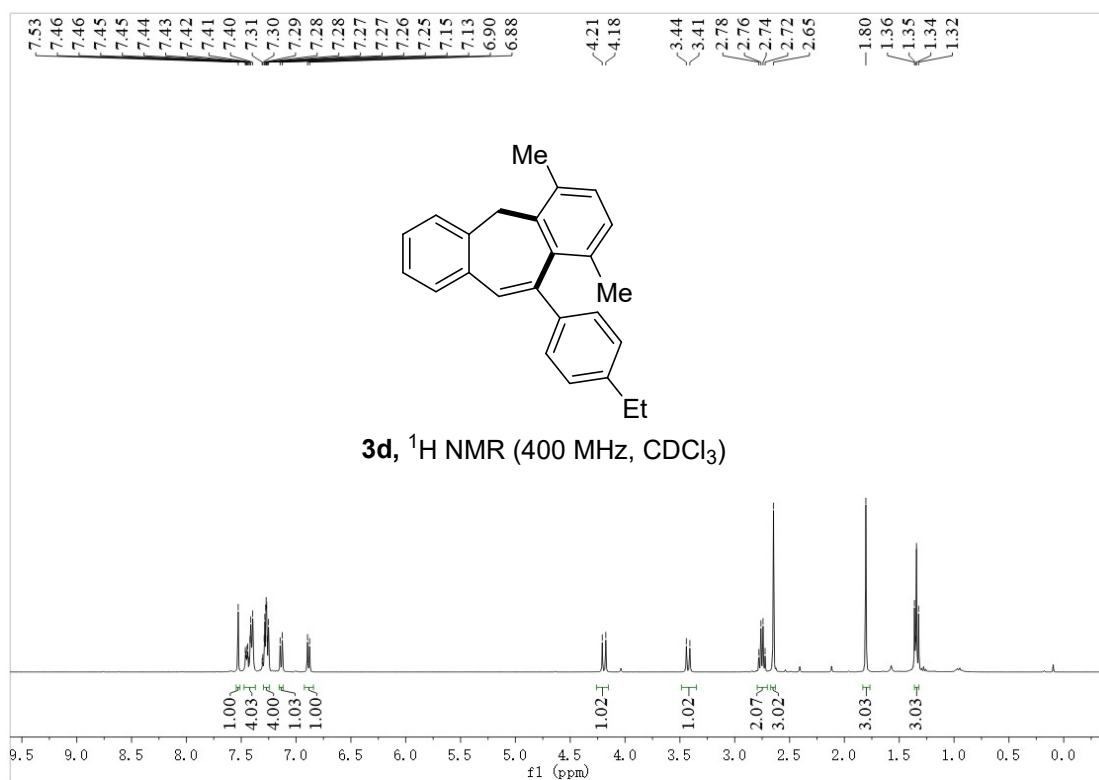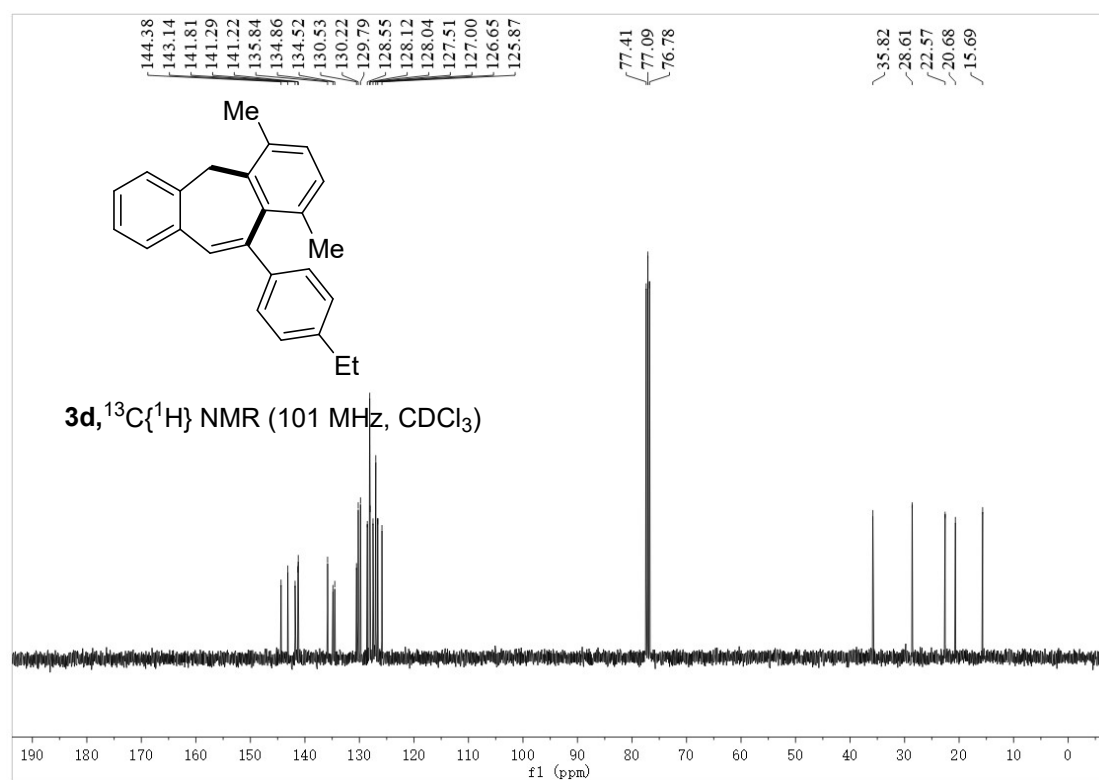



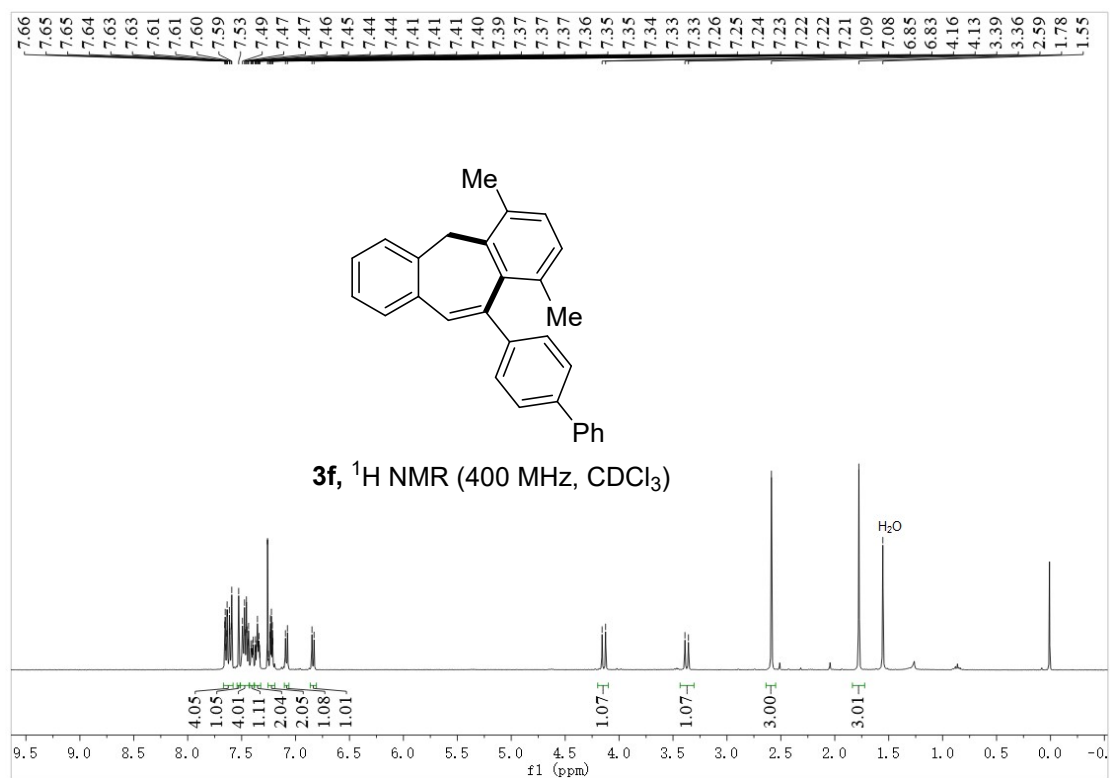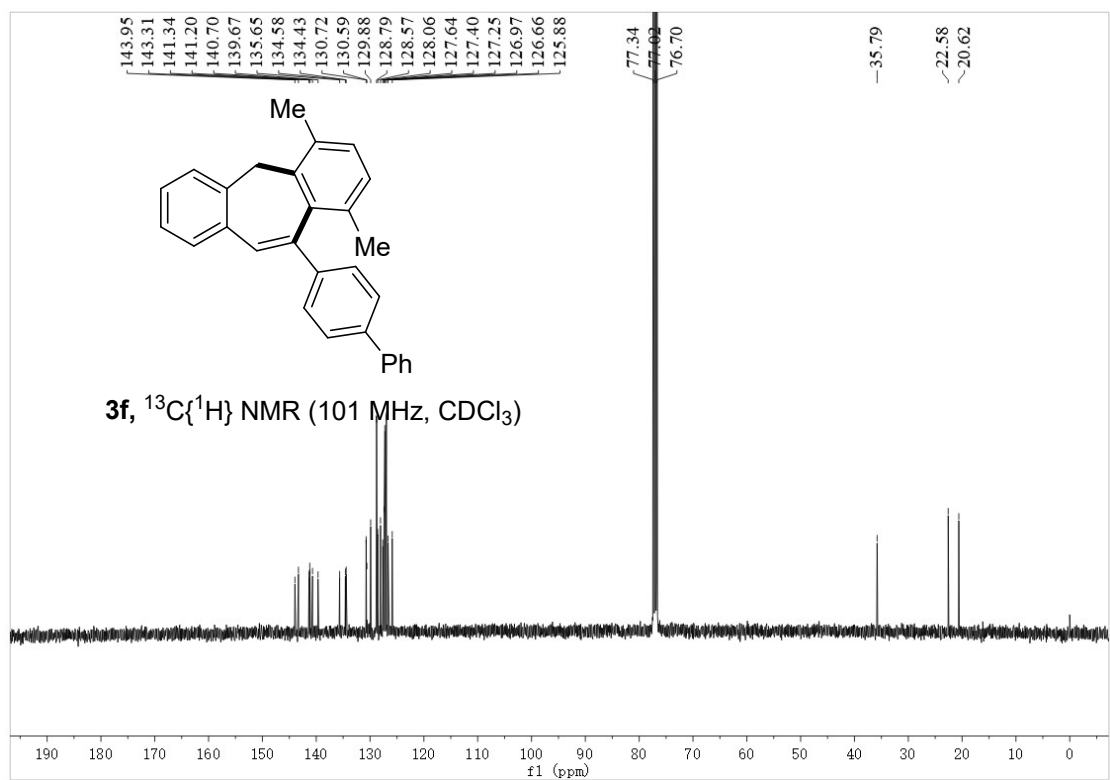

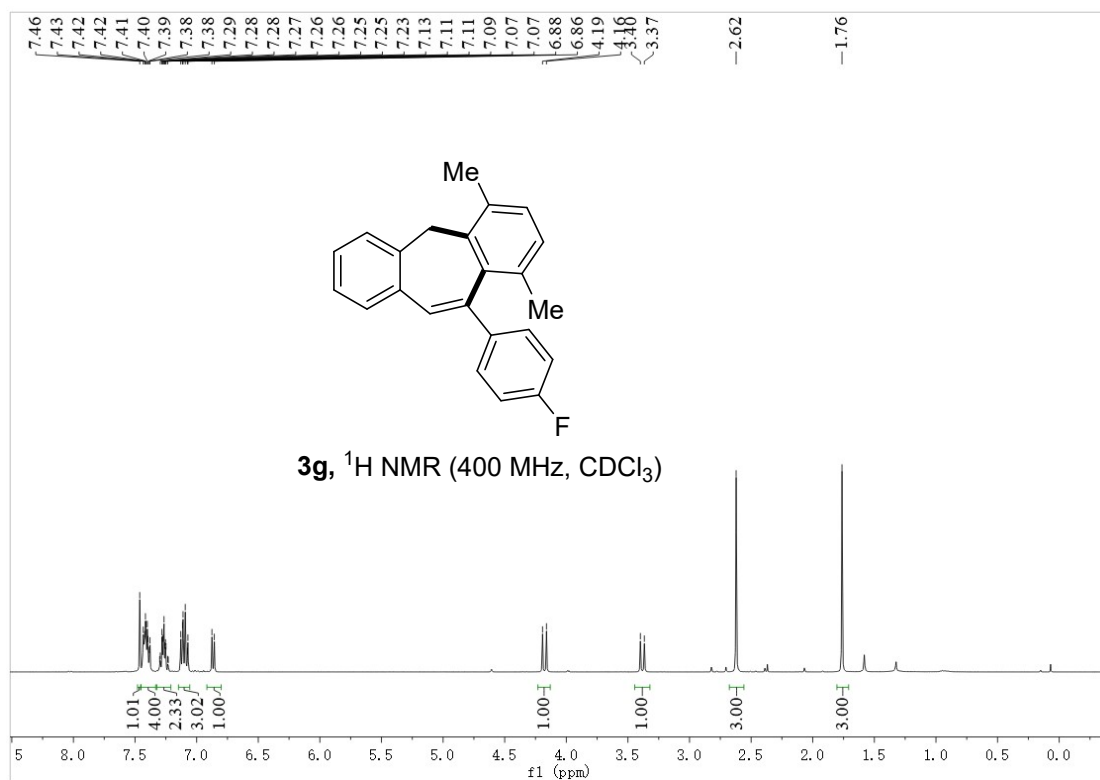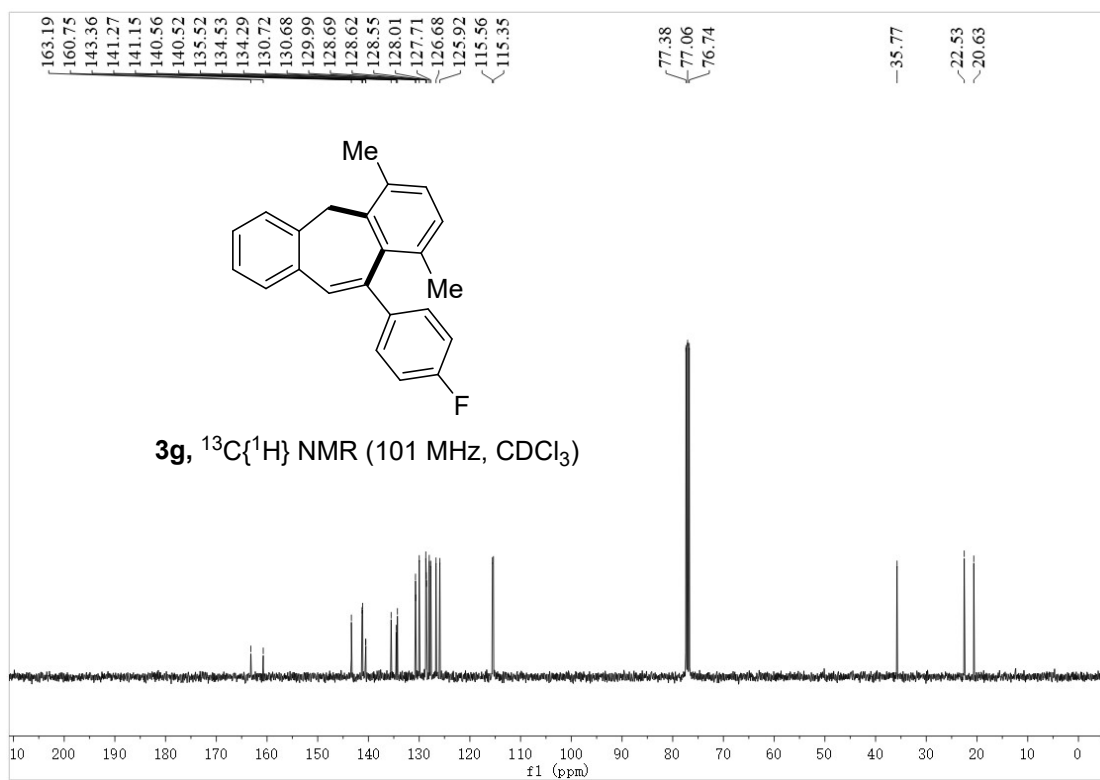

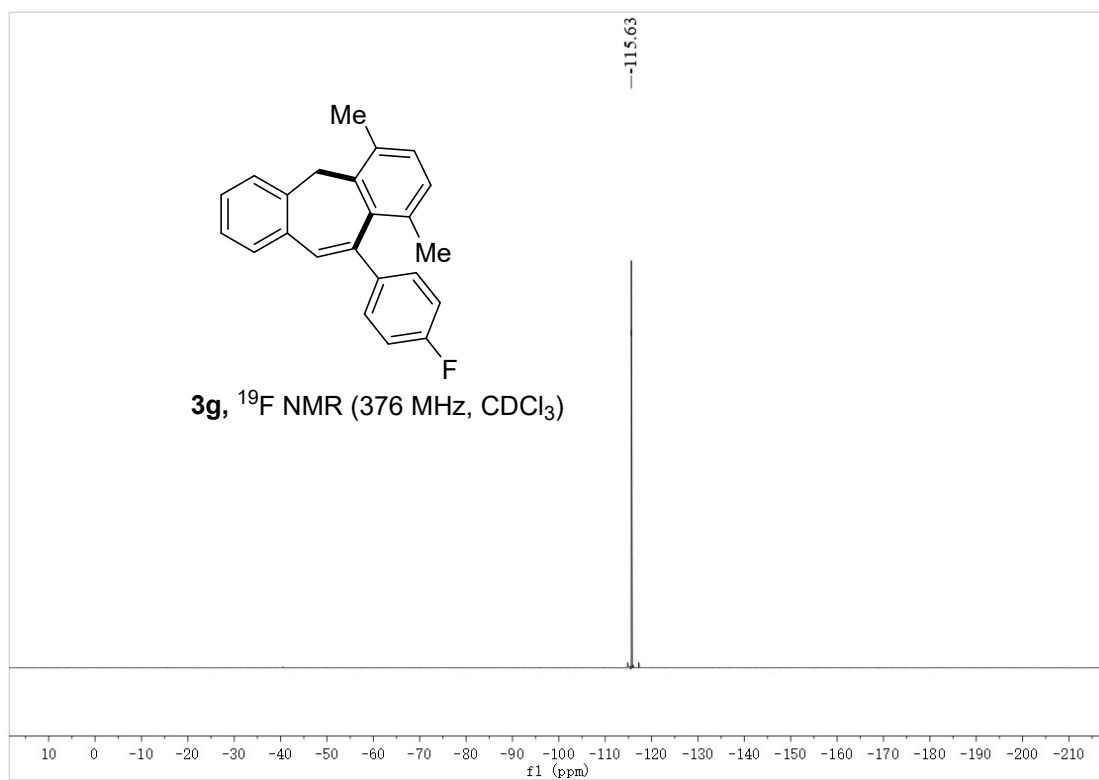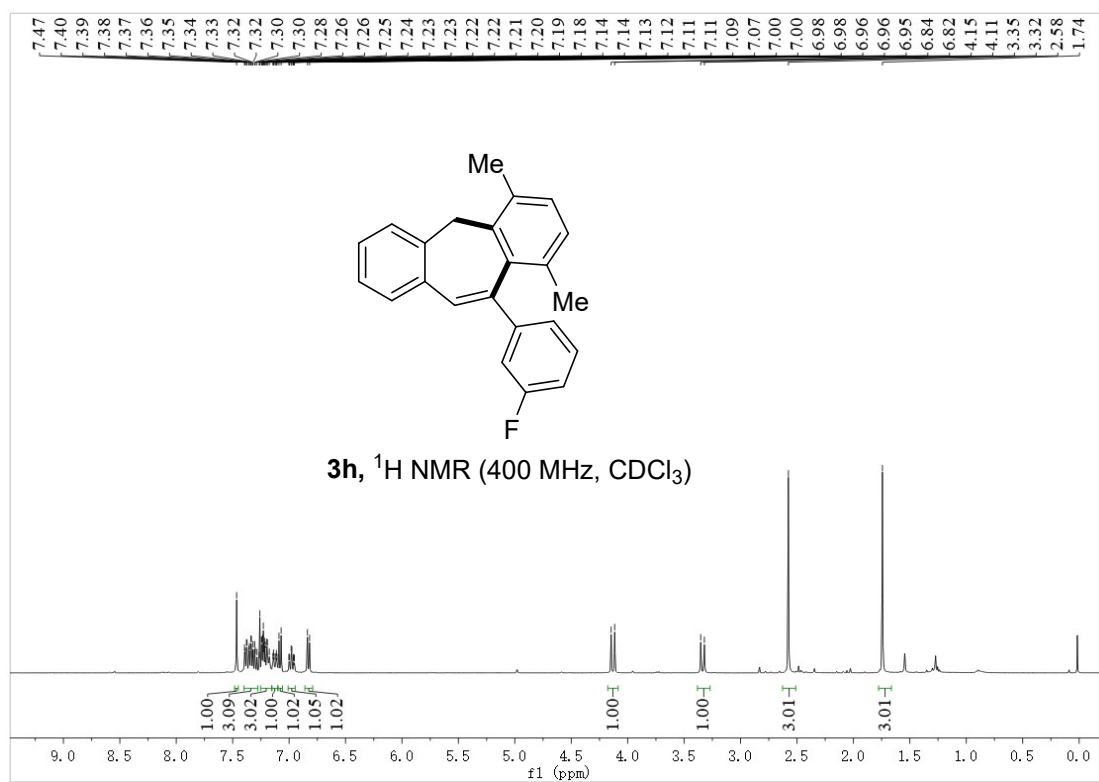

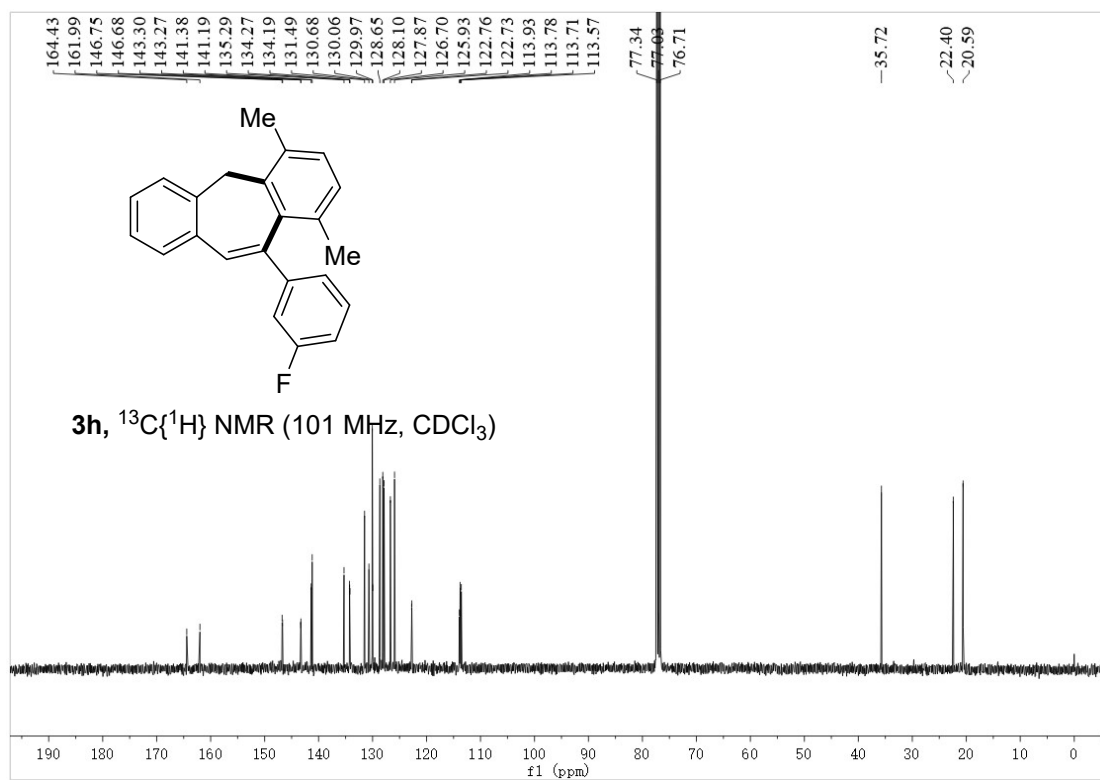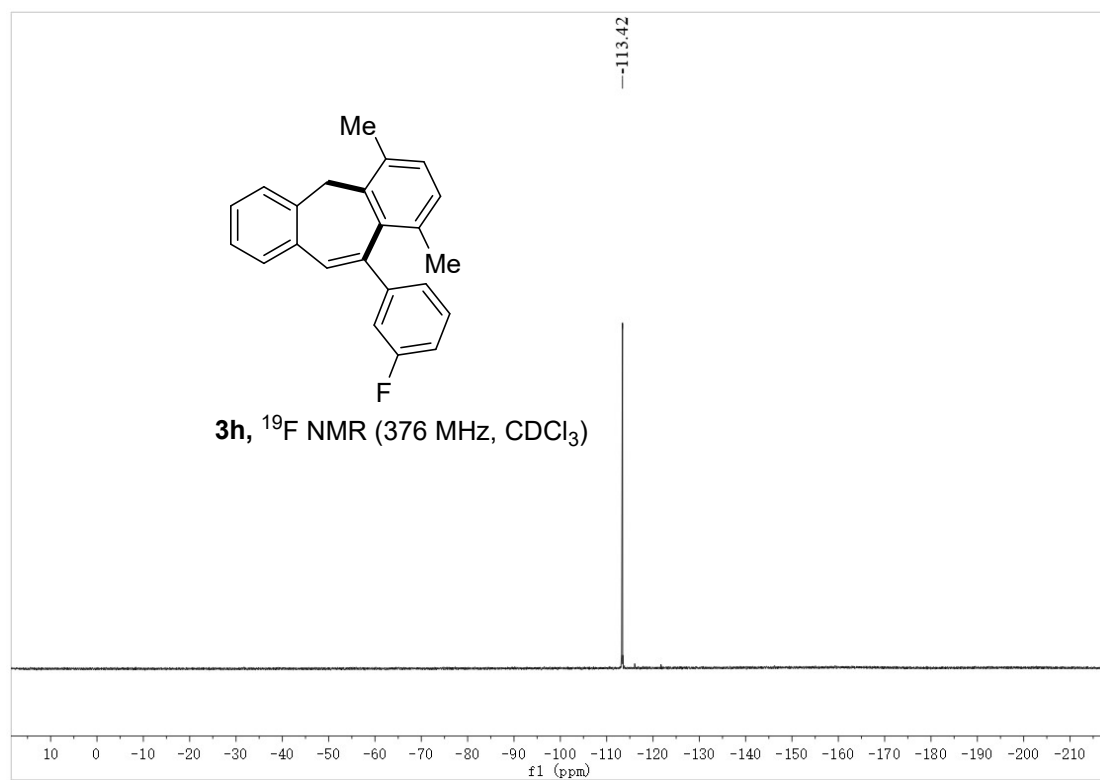

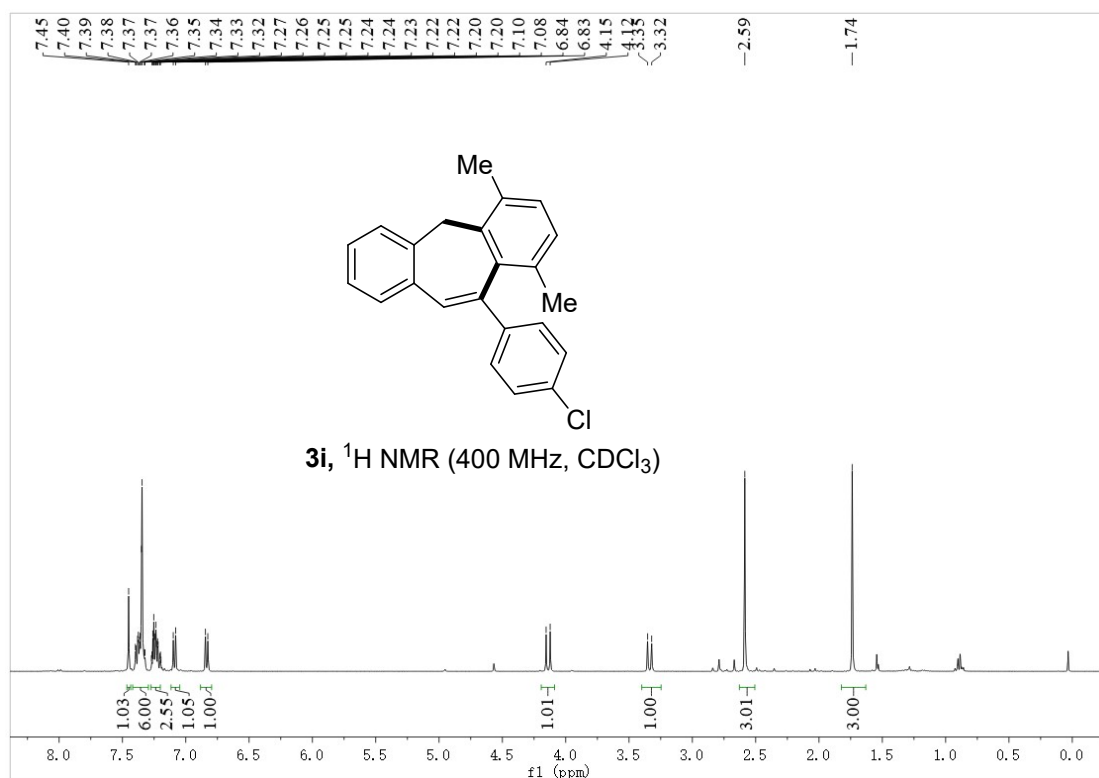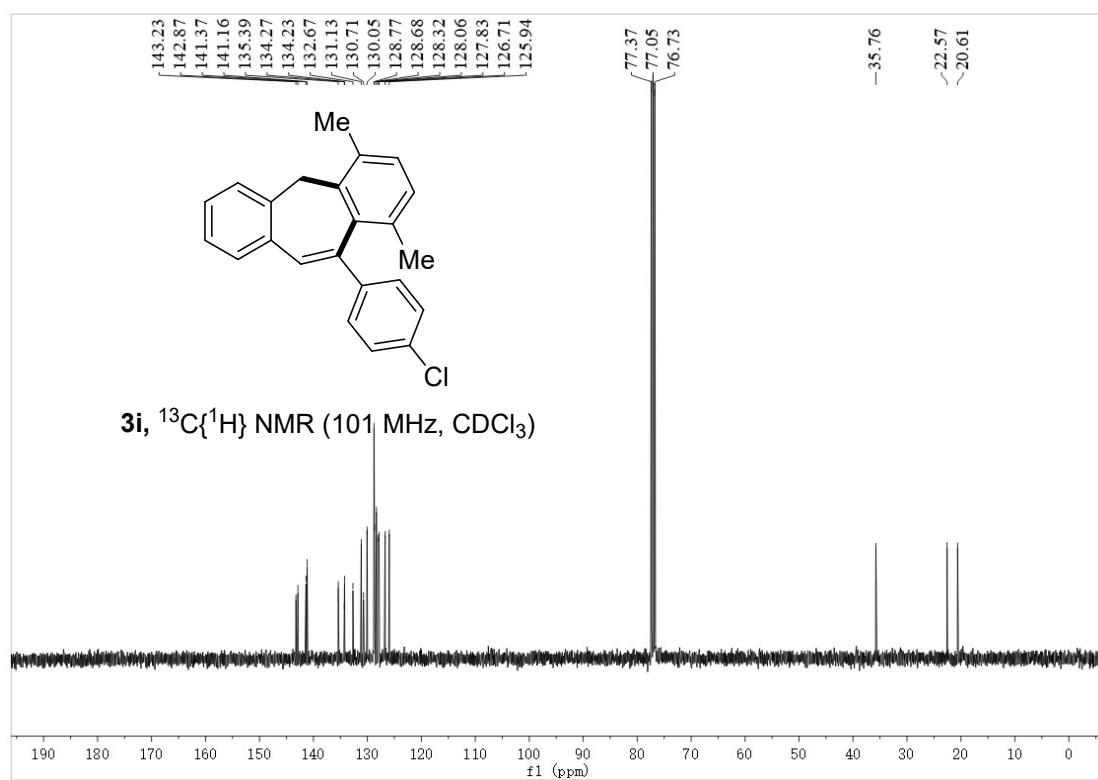



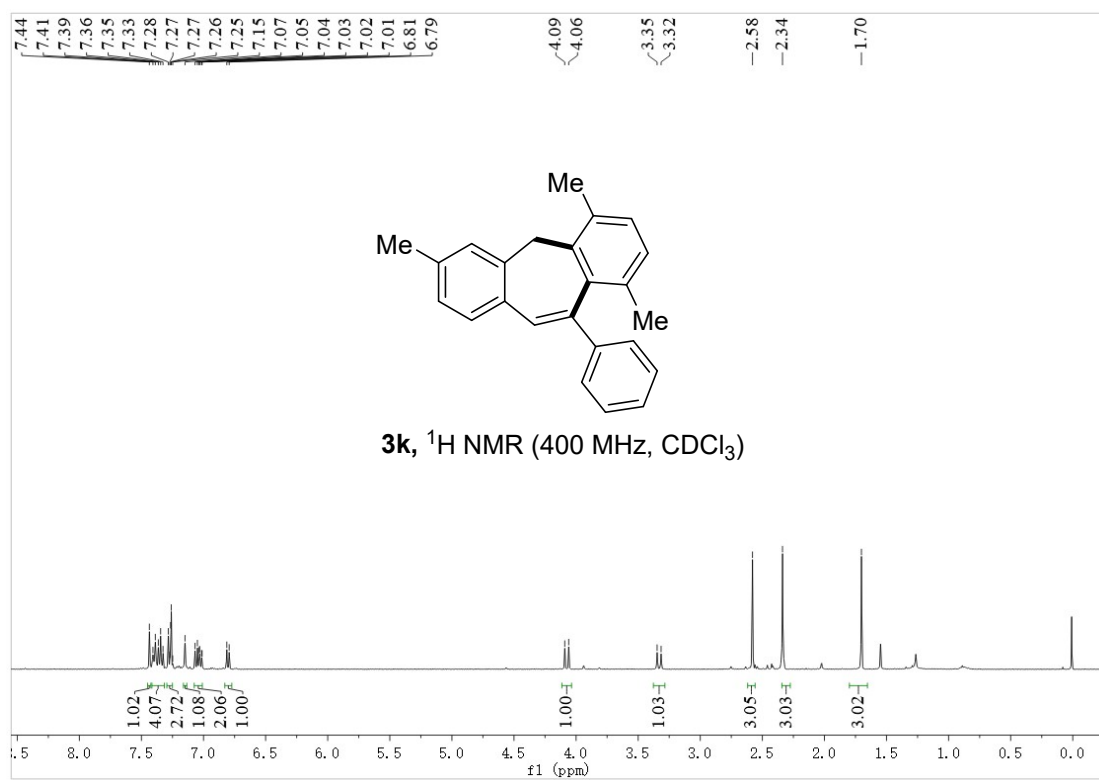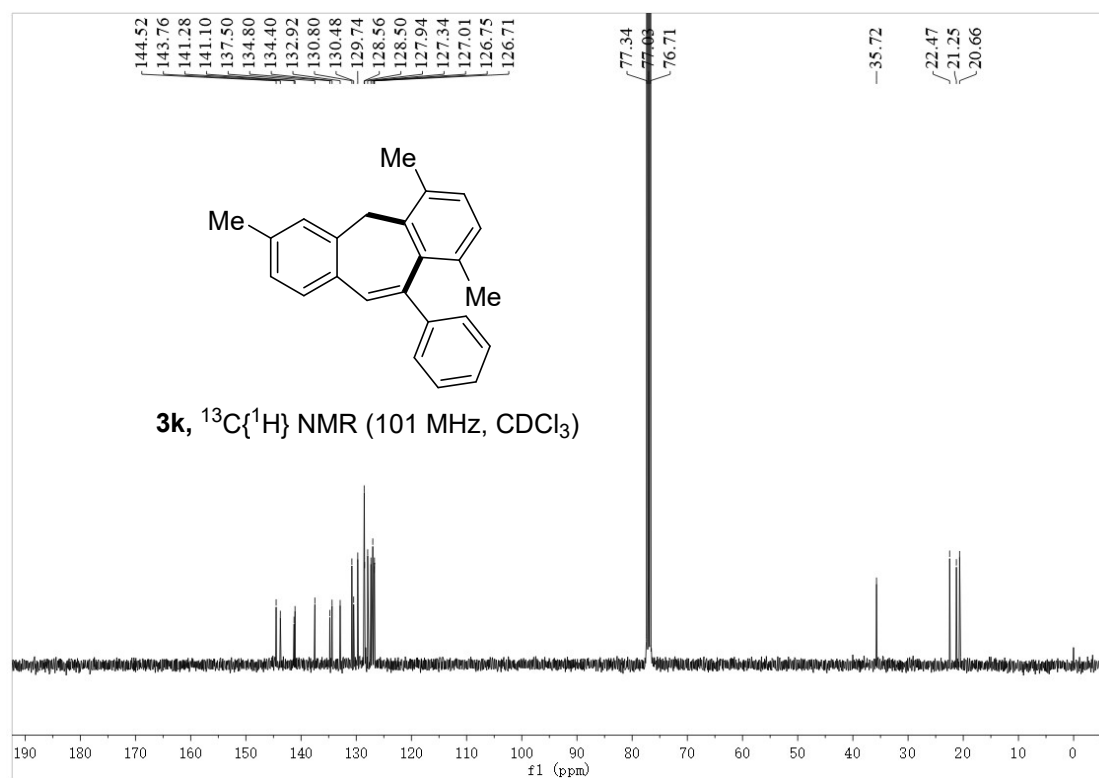

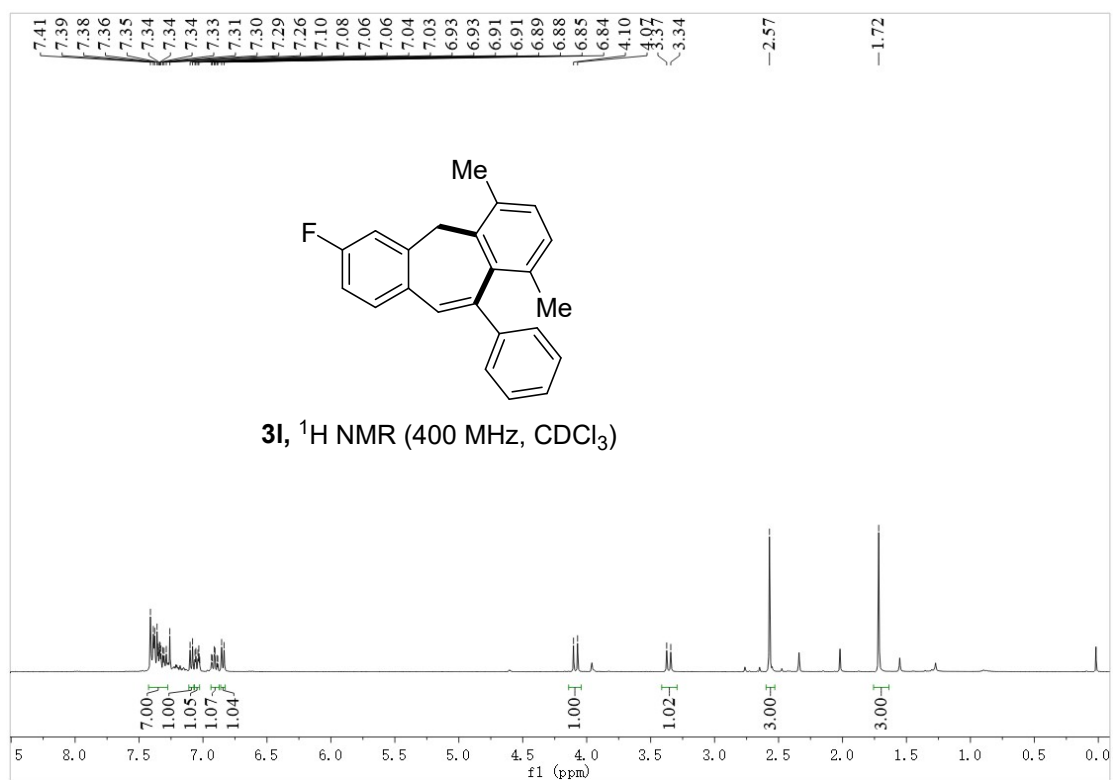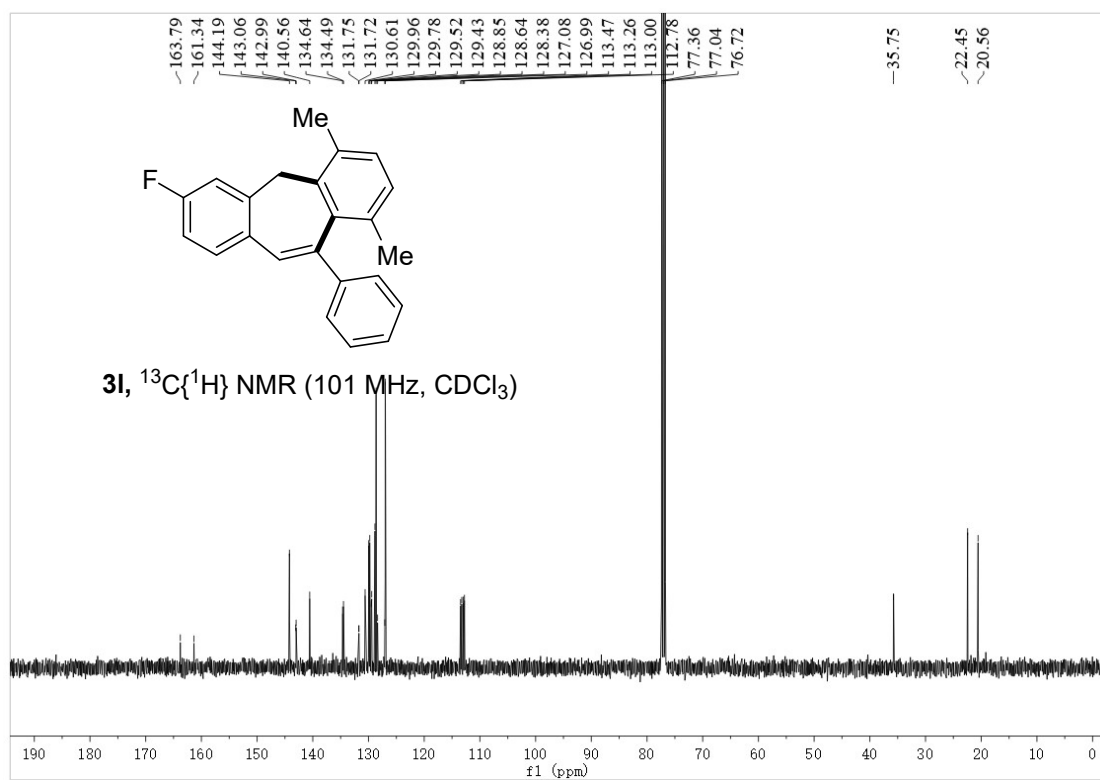

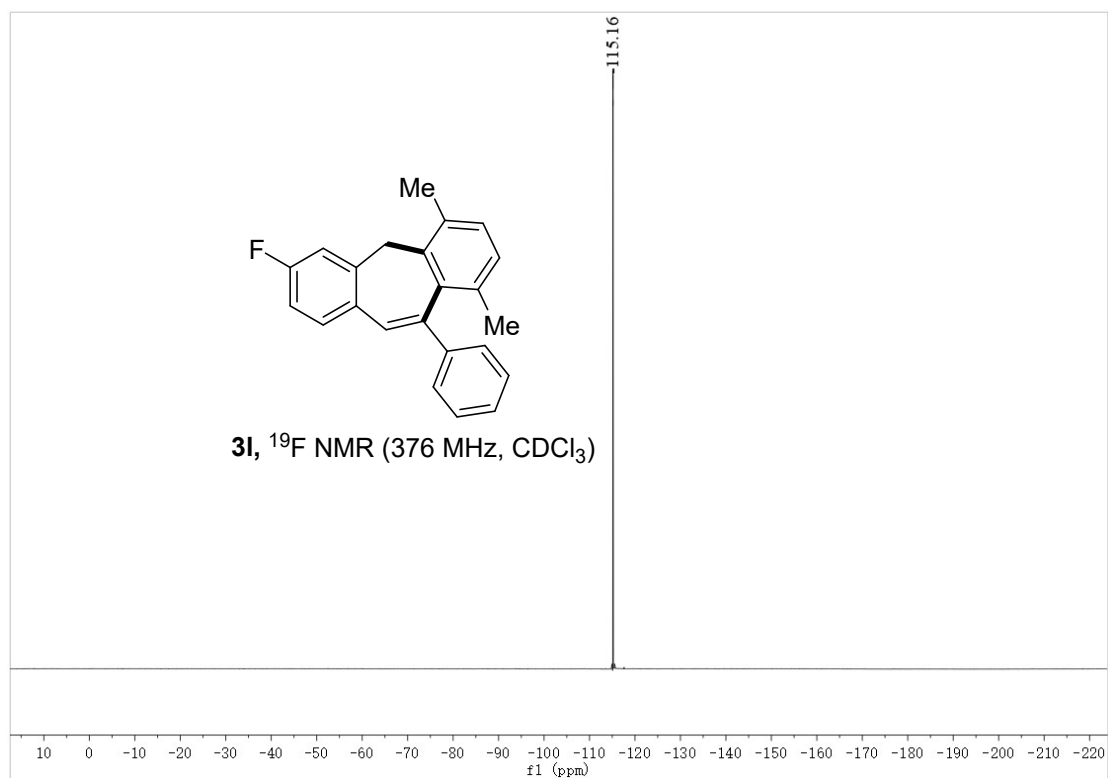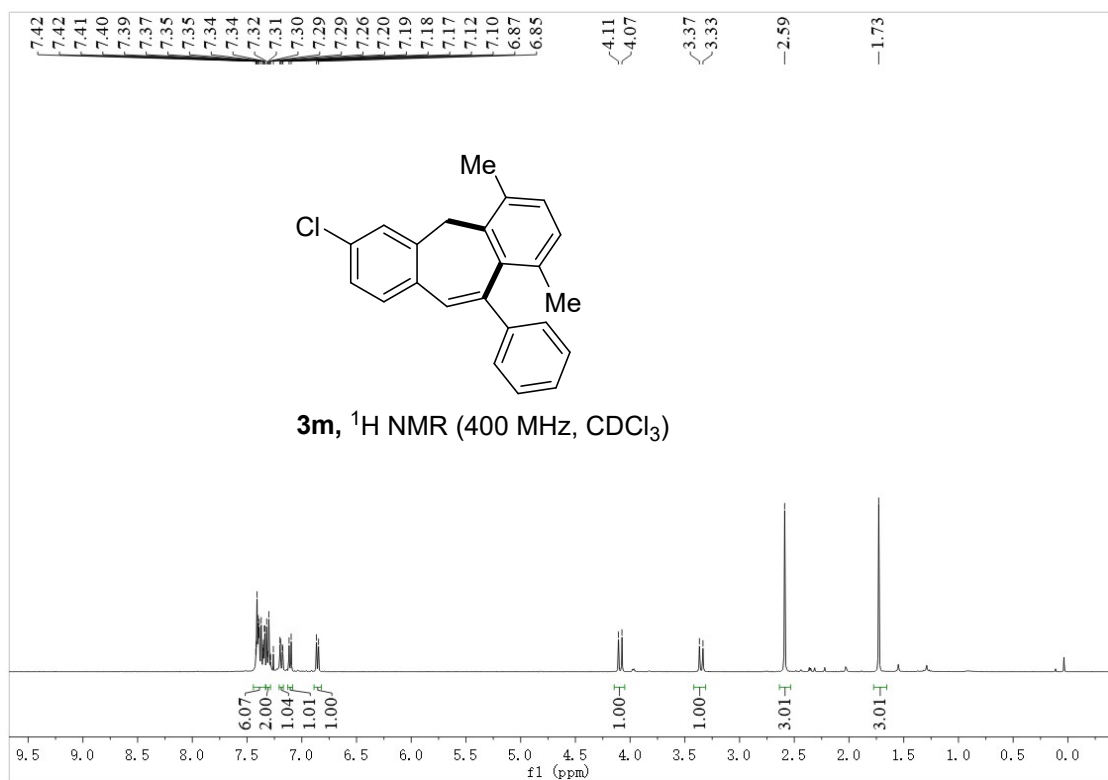

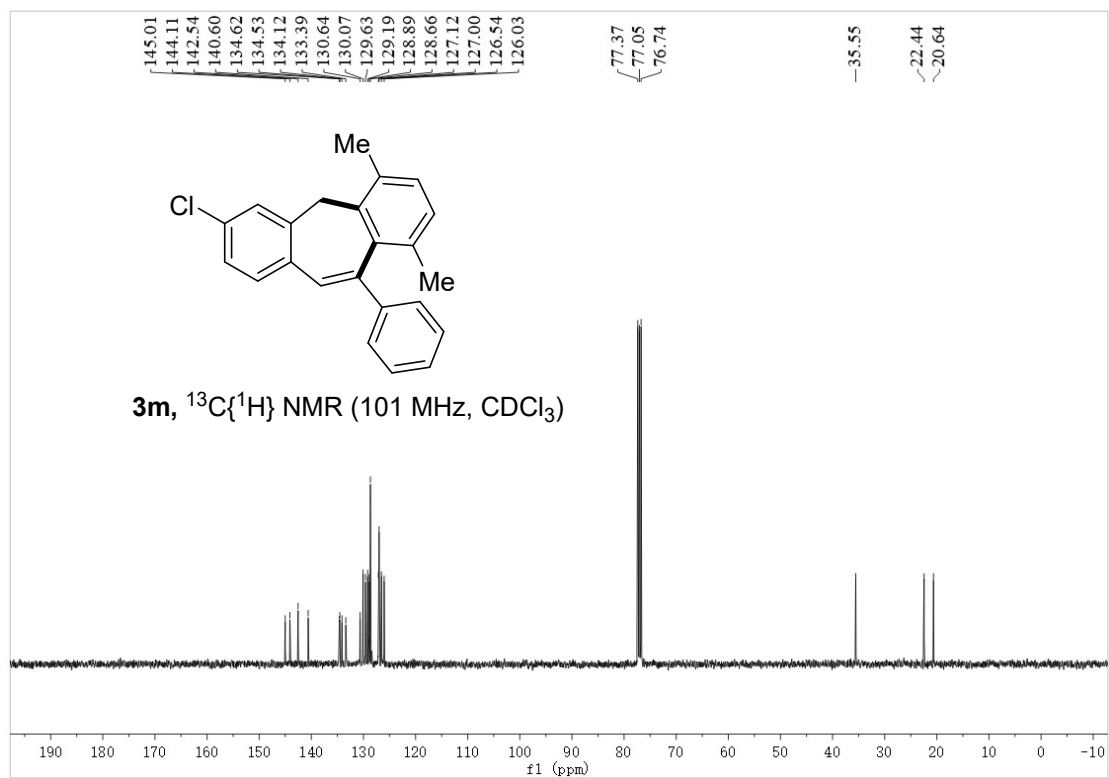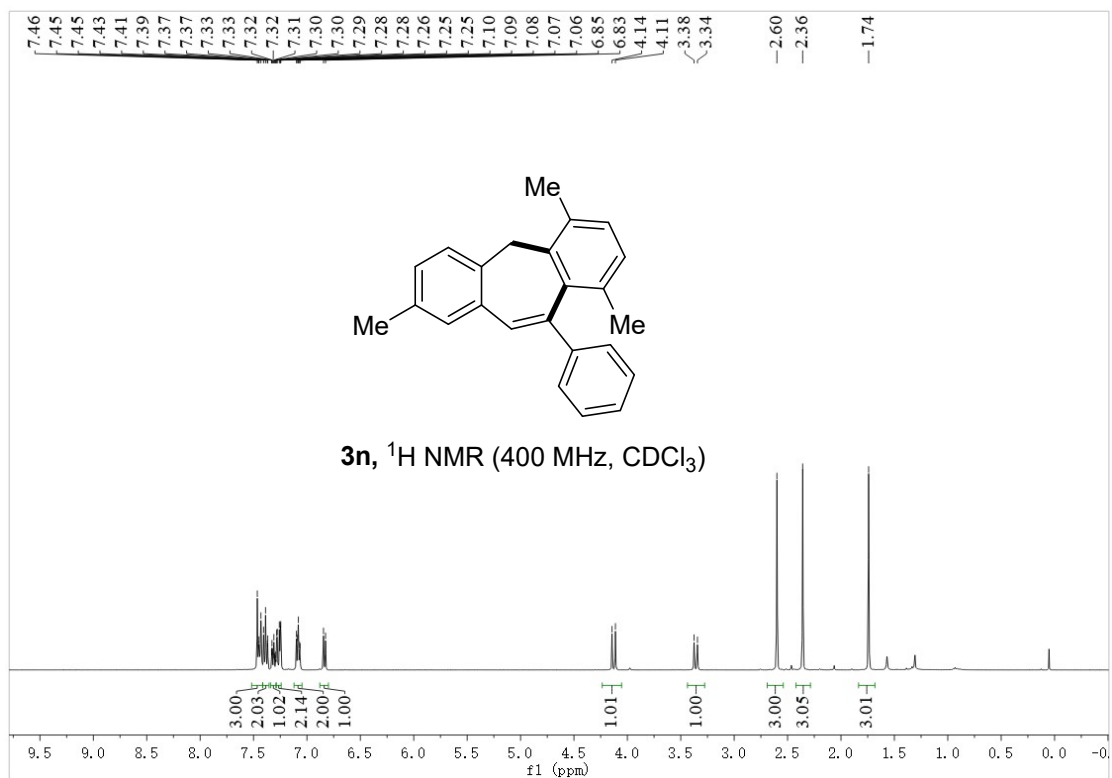

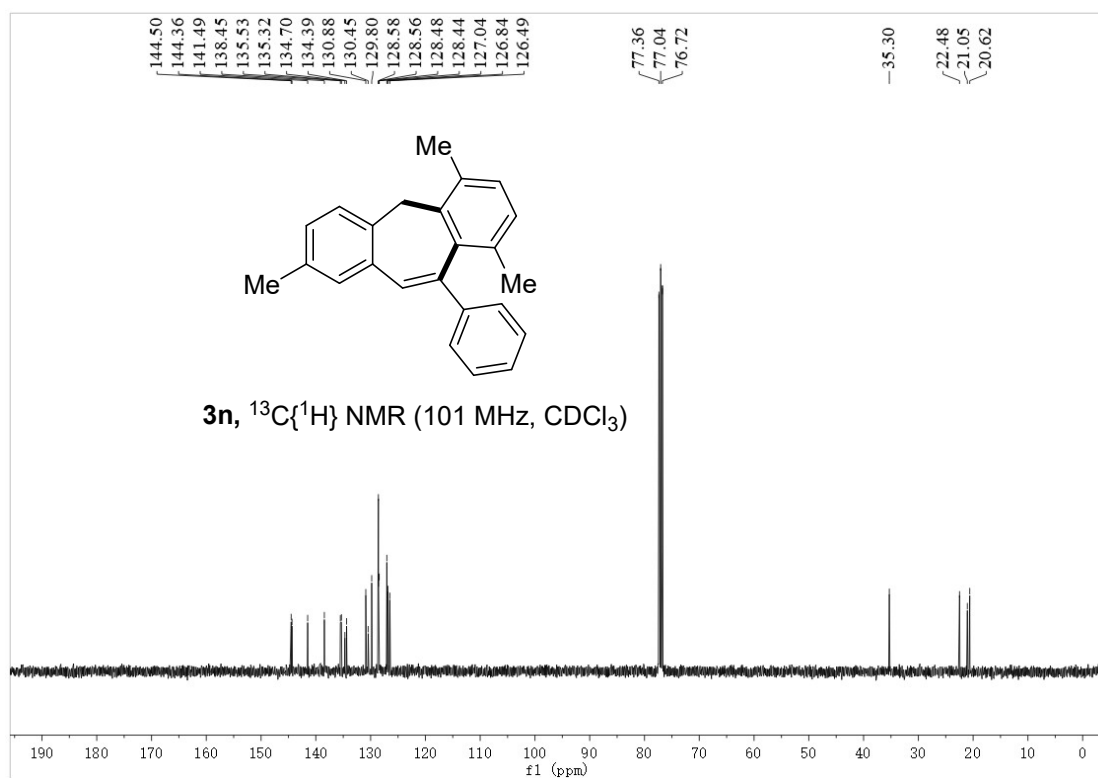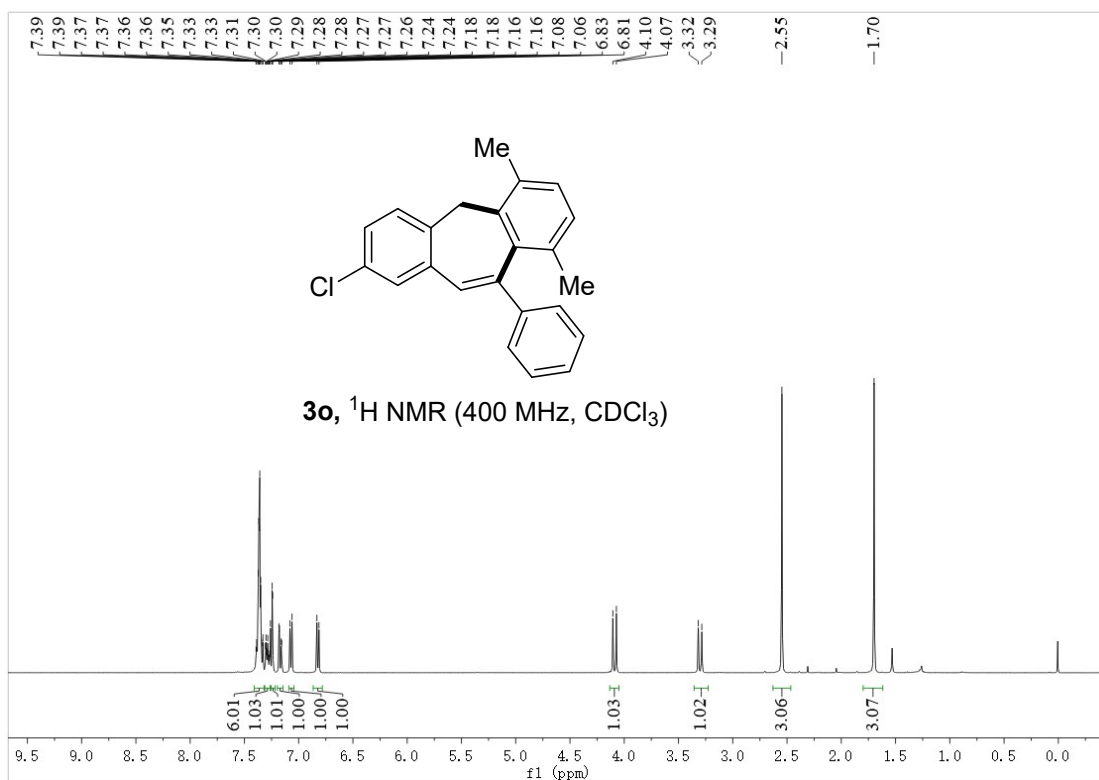

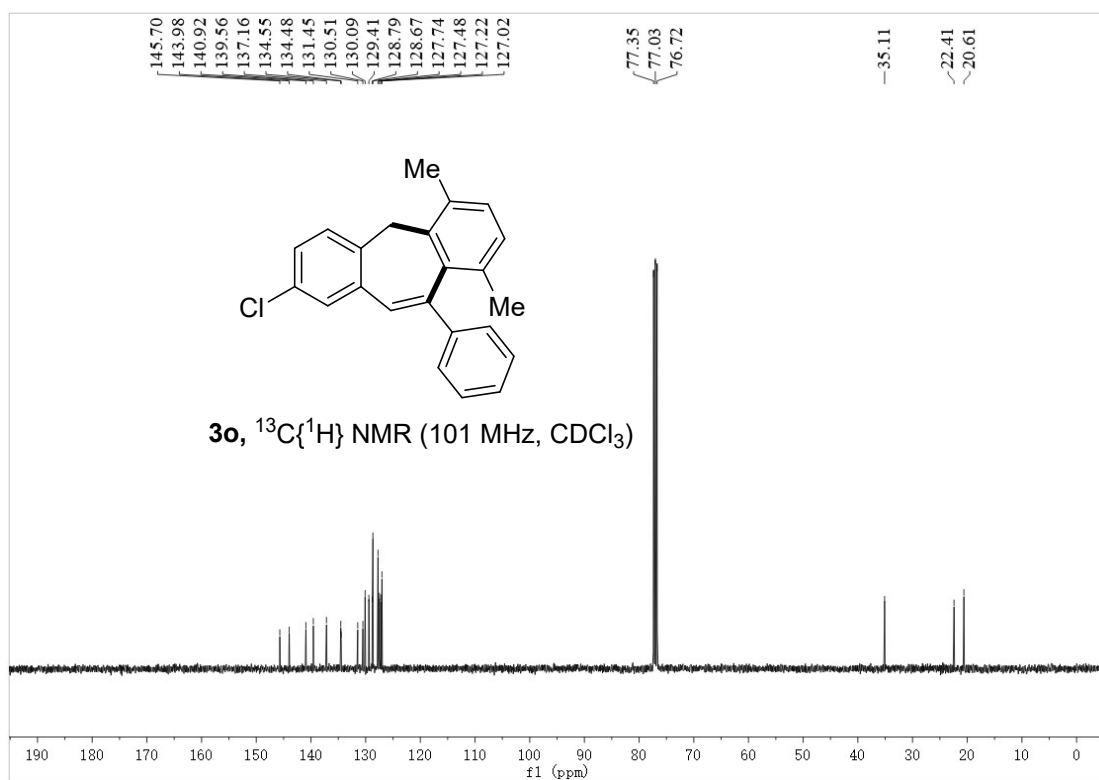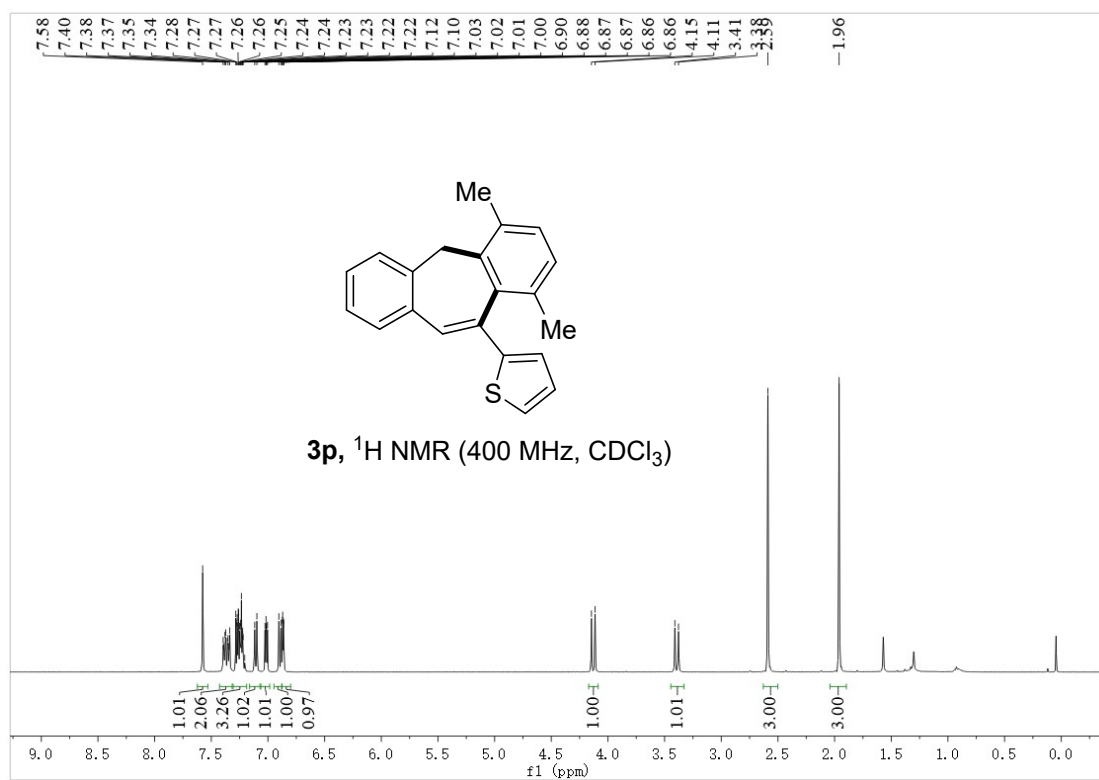

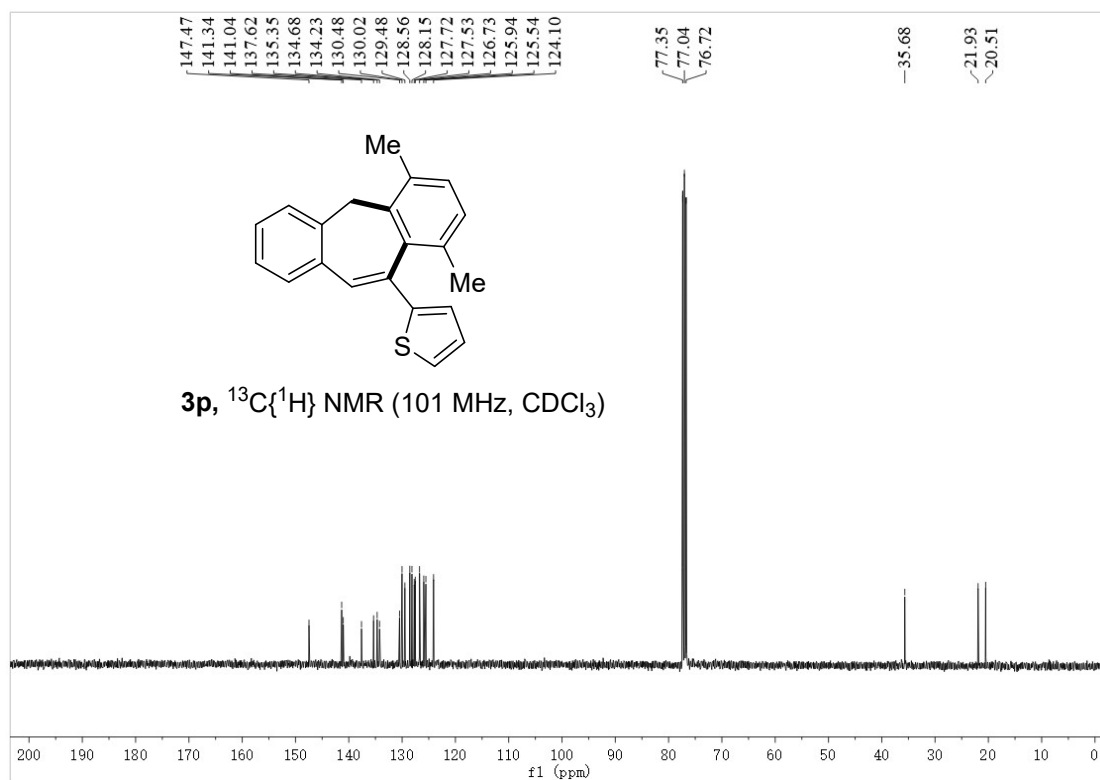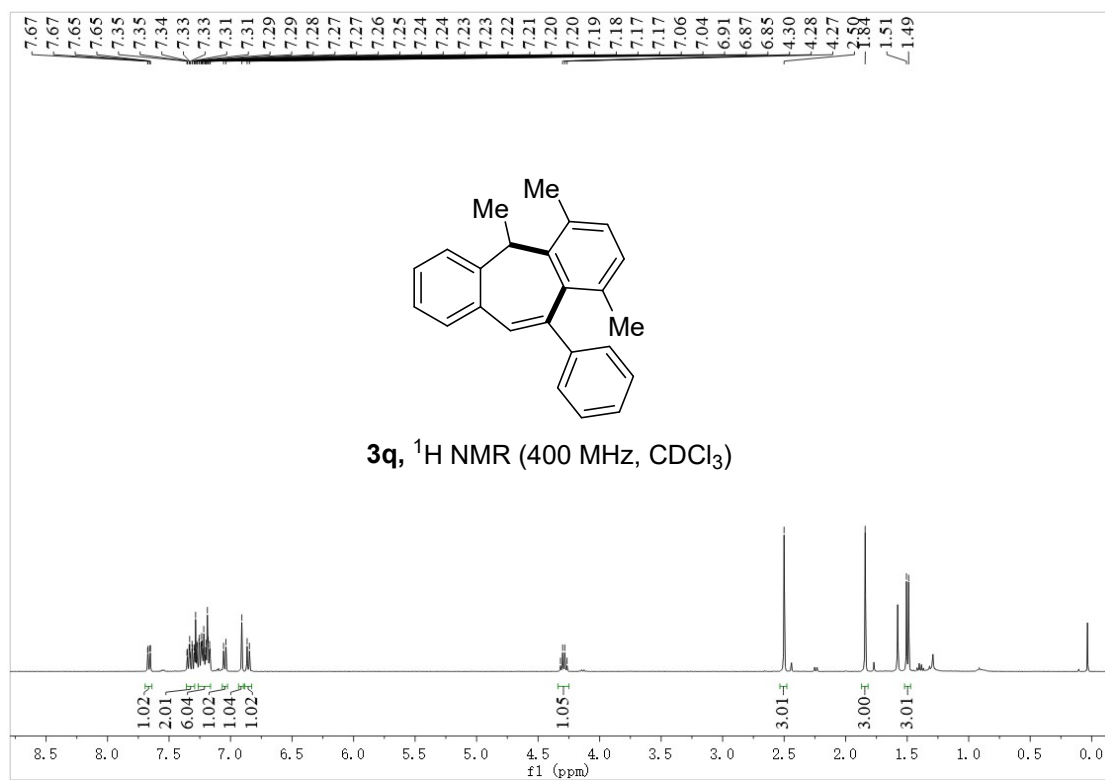

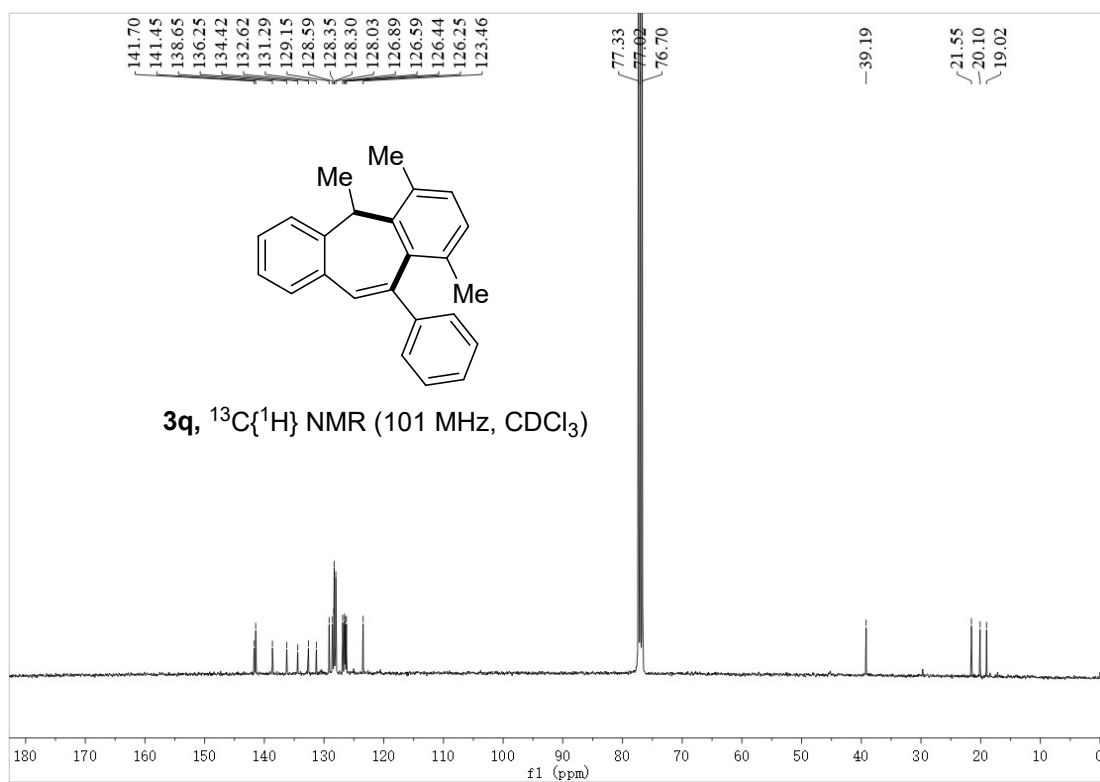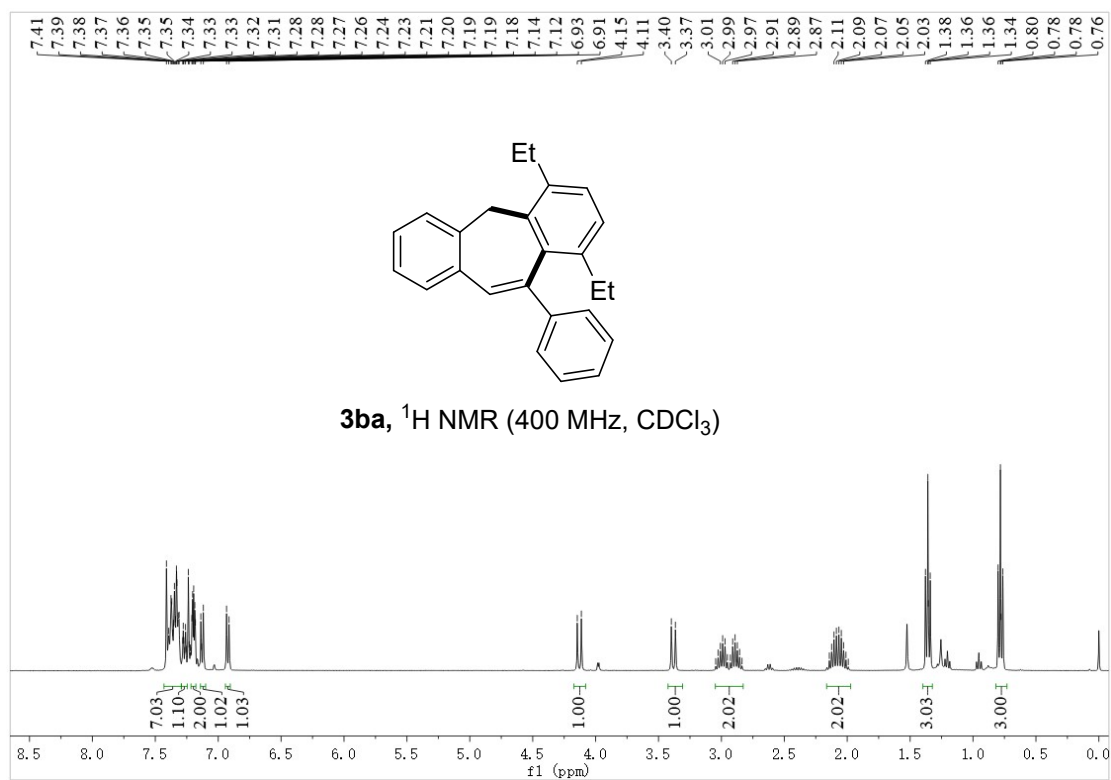

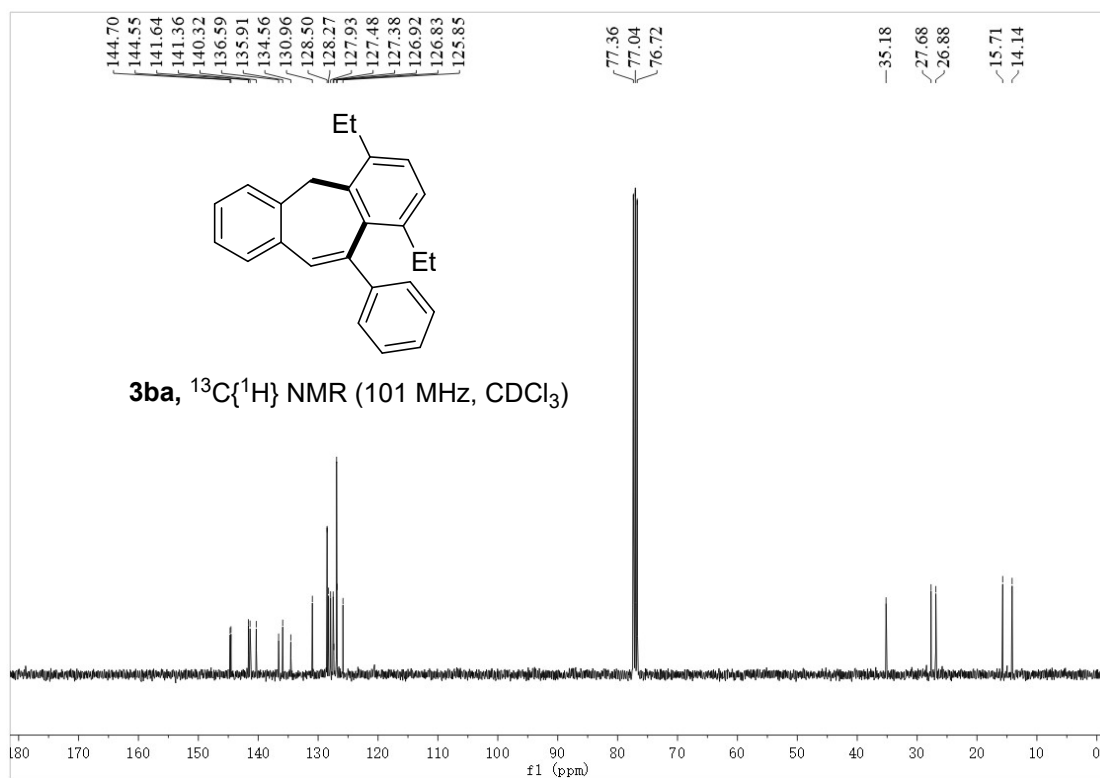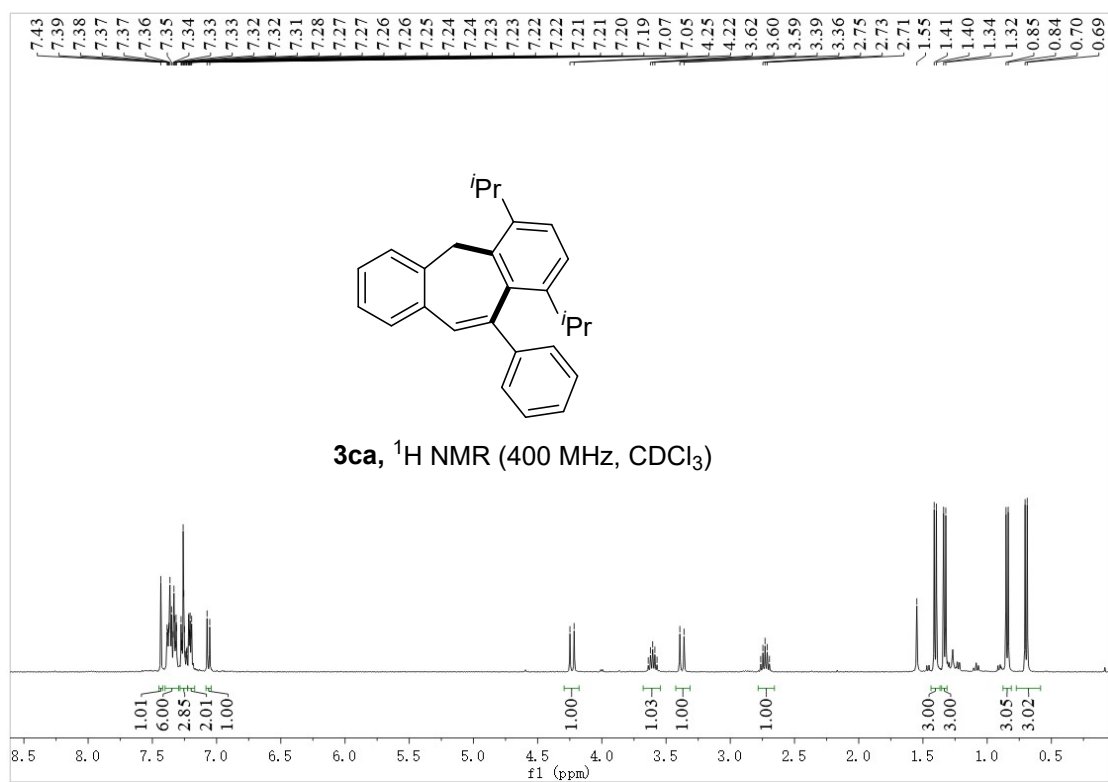

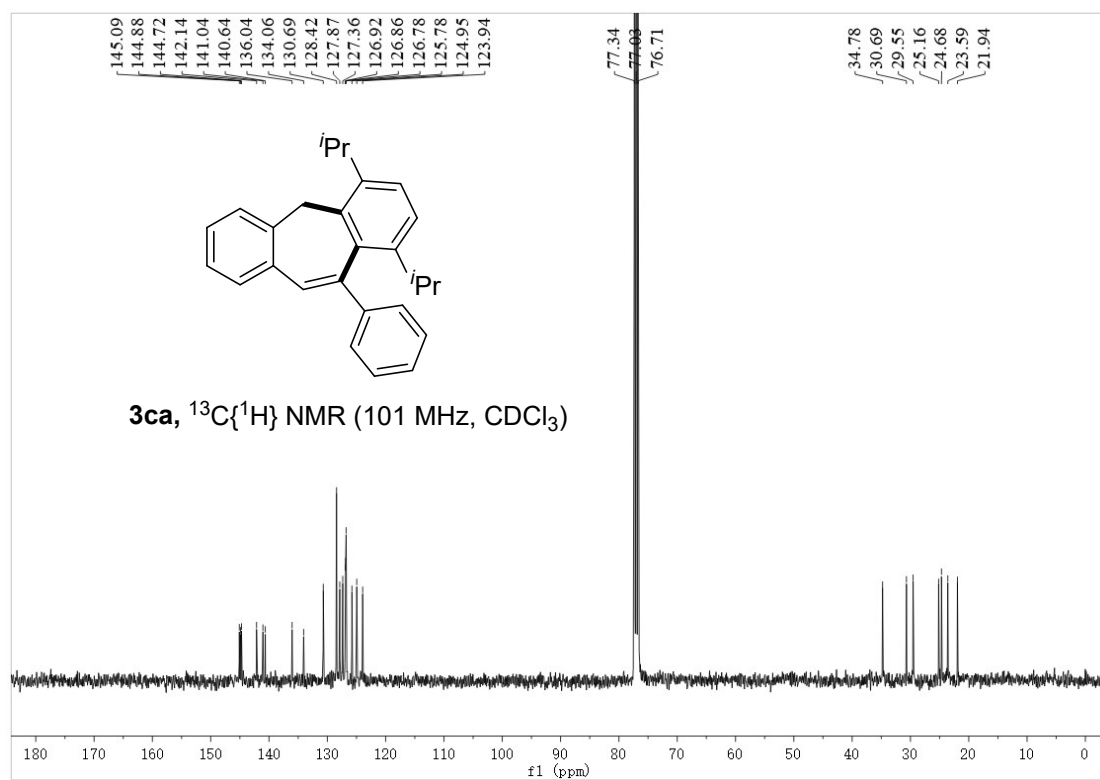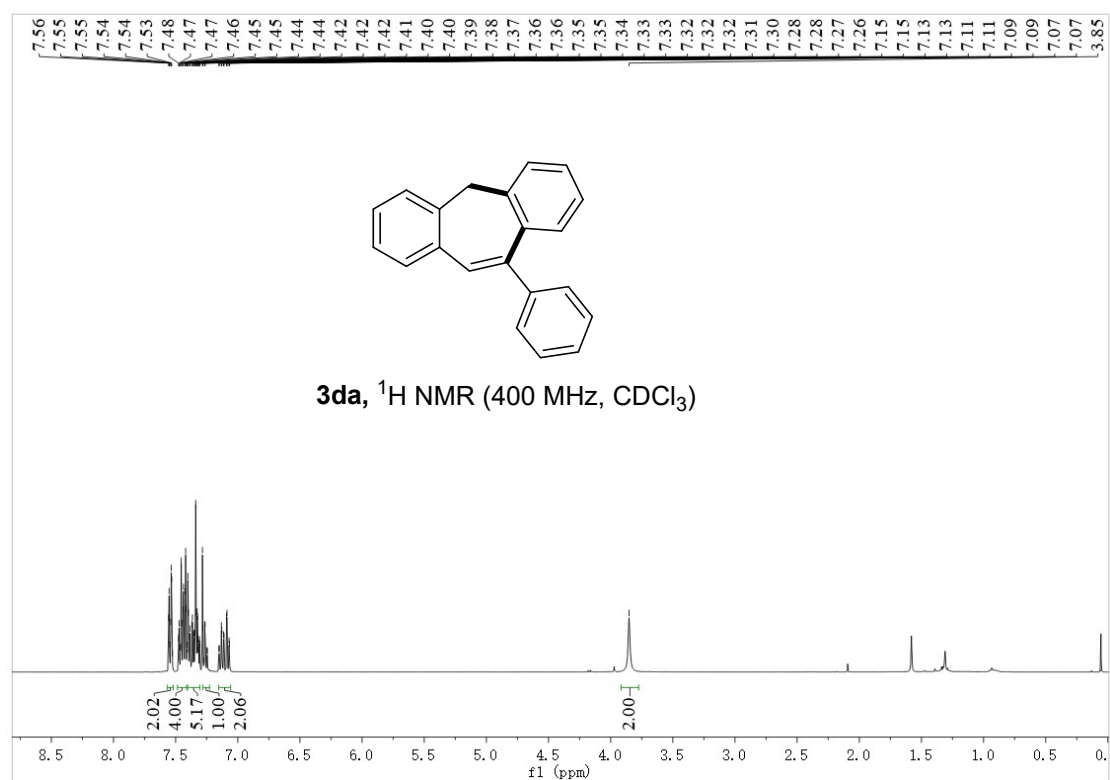

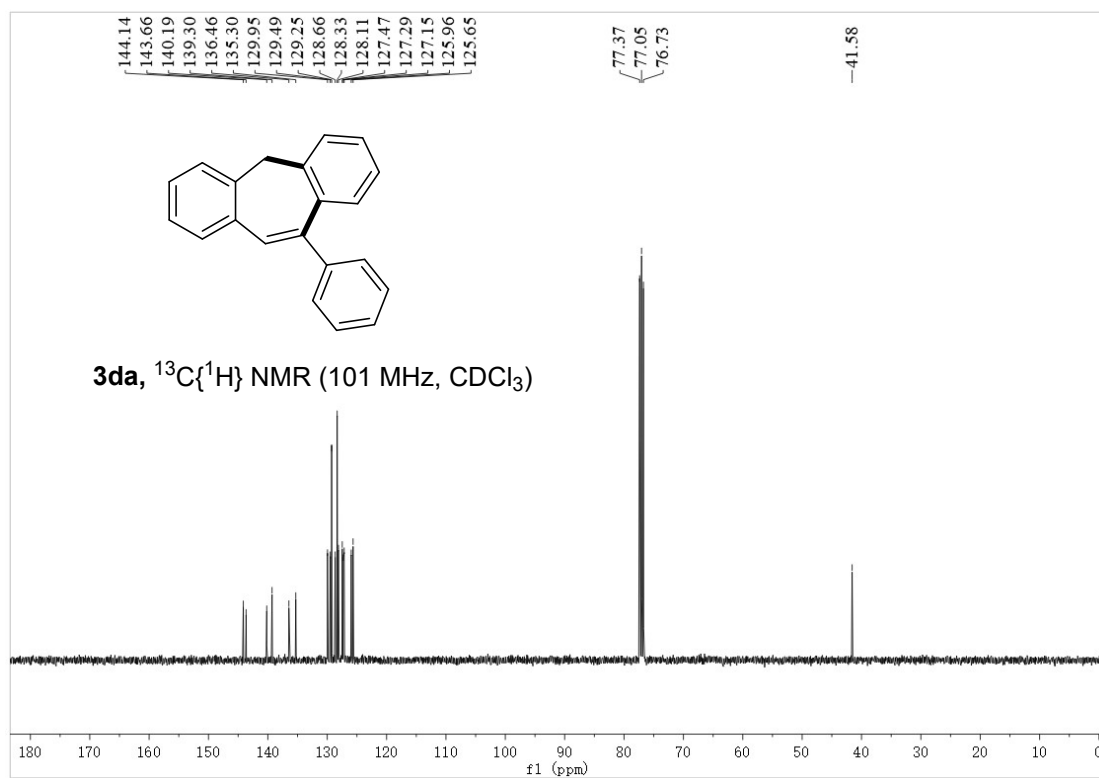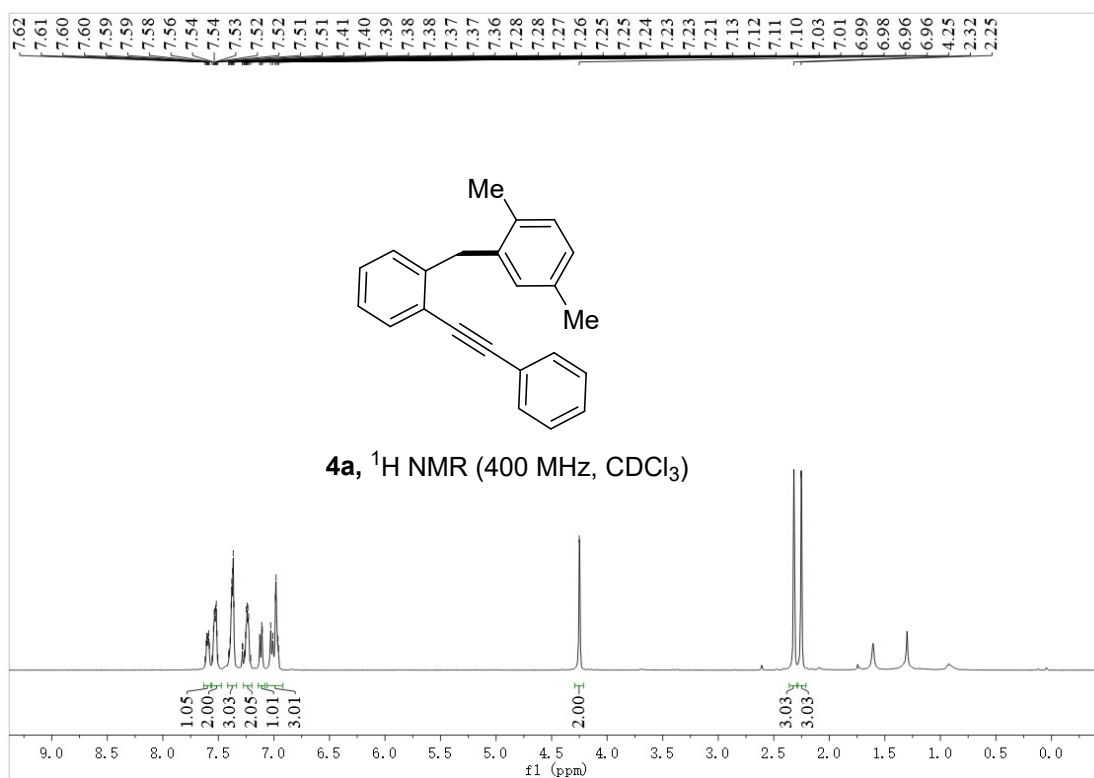

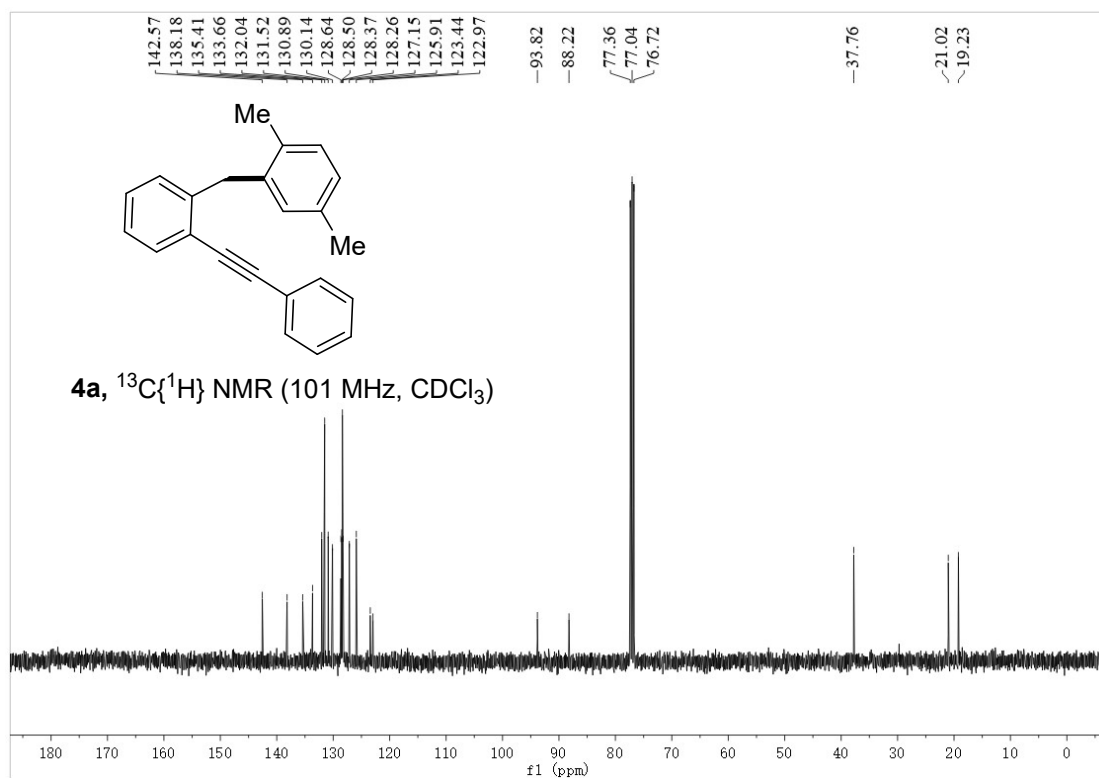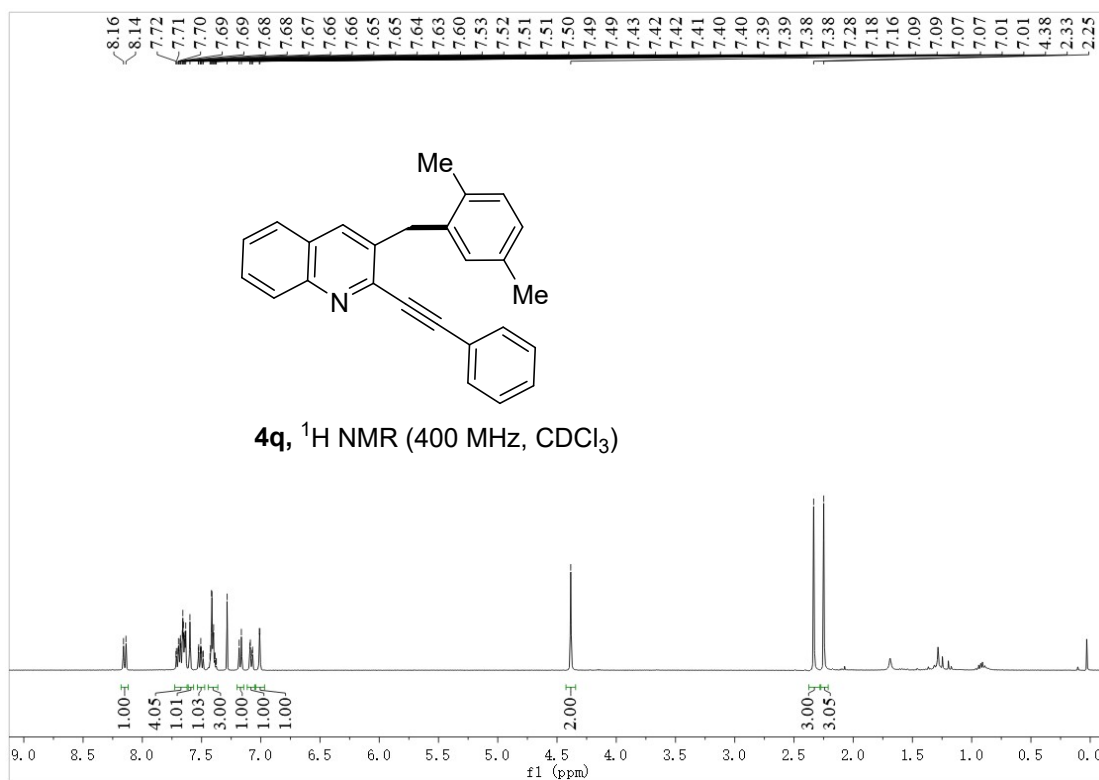

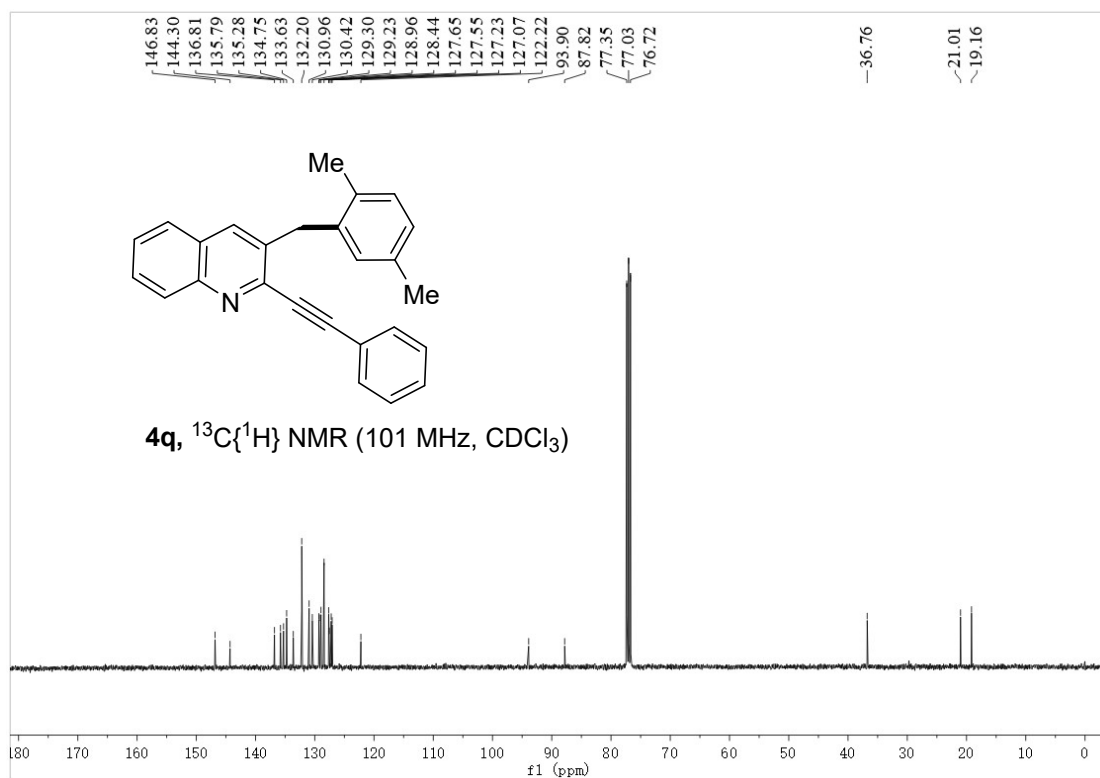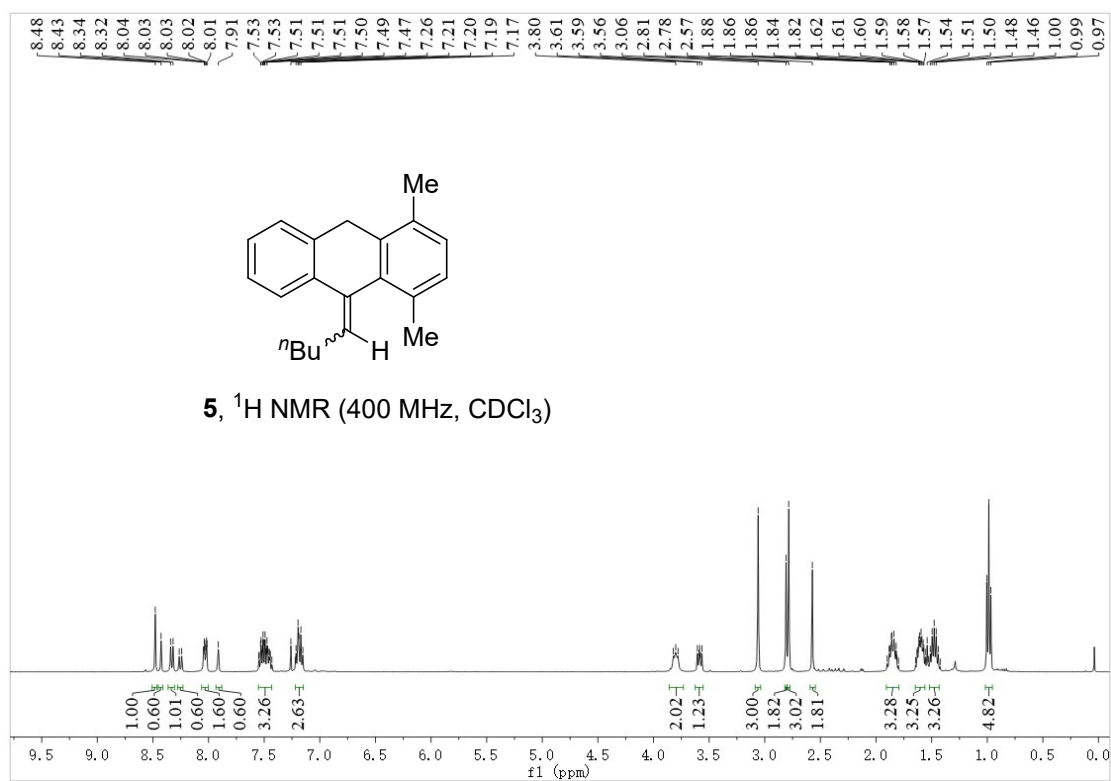

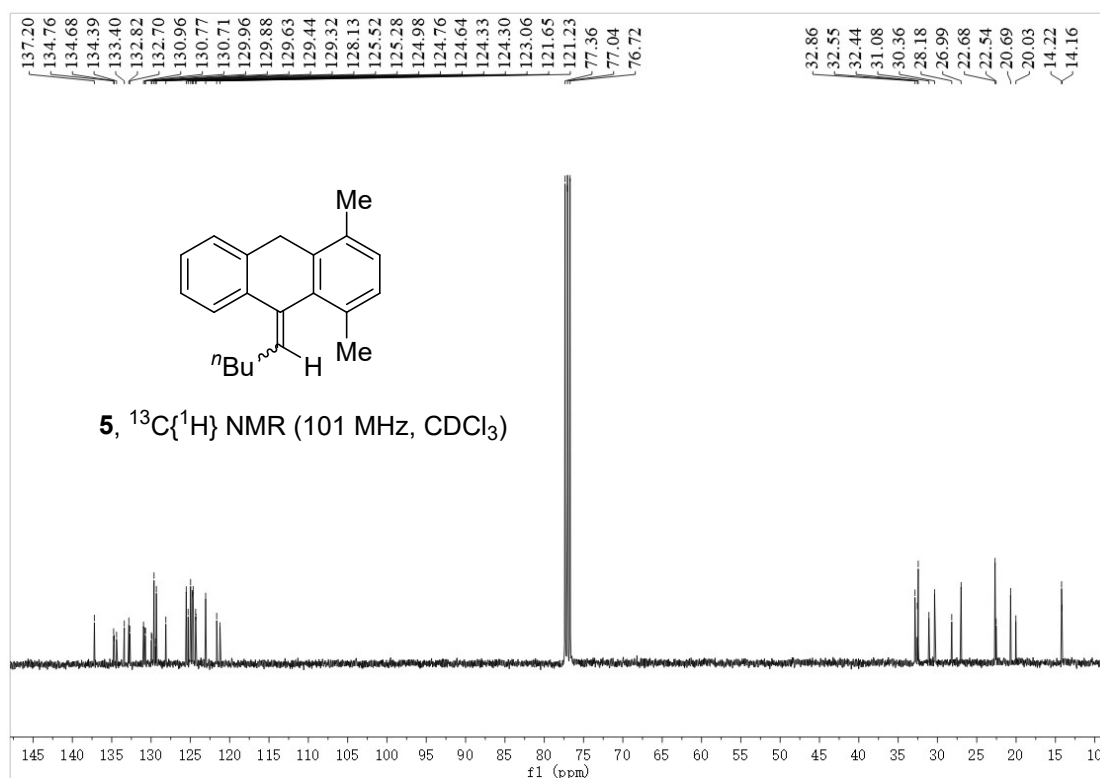

## Crystallographic spectrum of 3a

Qualified crystals of **3a** suitable for the X-ray crystallographic study were readily obtained by slow diffusion of n-hexane into  $\text{CHCl}_3$  solution of **3a**. Crystal data Crystallographic data for compound **3a** (CCDC 2163866) has been deposited with the Cambridge Crystallographic Data Centre, Copies of the data can be obtained, free of charge, on application to CCDC (Email:deposit@ccdc.cam.ac.uk).

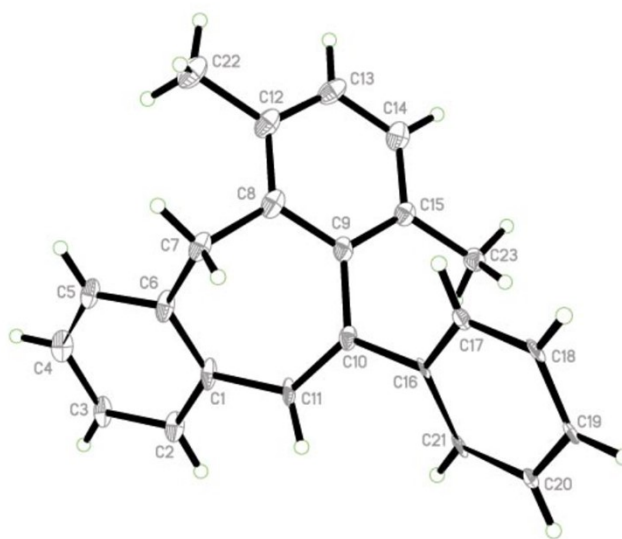

**Figure S1:** Ortep view of the complex **3a** (The ellipsoid contour percent probability level is 30%).

Table 1. Crystal data and structure refinement for **3a**.

|                                   |                                             |                       |
|-----------------------------------|---------------------------------------------|-----------------------|
| Identification code               | 2                                           |                       |
| Empirical formula                 | C <sub>23</sub> H <sub>20</sub>             |                       |
| Formula weight                    | 296.39                                      |                       |
| Temperature                       | 153(2) K                                    |                       |
| Wavelength                        | 1.54184 Å                                   |                       |
| Crystal system                    | Orthorhombic                                |                       |
| Space group                       | P2(1)2(1)2(1)                               |                       |
| Unit cell dimensions              | a = 5.66890(10) Å                           | $\alpha = 90^\circ$ . |
|                                   | b = 10.27550(10) Å                          | $\beta = 90^\circ$ .  |
|                                   | c = 27.4770(4) Å                            | $\gamma = 90^\circ$ . |
| Volume                            | 1600.56(4) Å <sup>3</sup>                   |                       |
| Z                                 | 4                                           |                       |
| Density (calculated)              | 1.230 Mg/m <sup>3</sup>                     |                       |
| Absorption coefficient            | 0.520 mm <sup>-1</sup>                      |                       |
| F(000)                            | 632                                         |                       |
| Crystal size                      | 0.80 x 0.30 x 0.30 mm <sup>3</sup>          |                       |
| Theta range for data collection   | 3.22 to 74.14°.                             |                       |
| Index ranges                      | -6 ≤ h ≤ 2, -12 ≤ k ≤ 12, -32 ≤ l ≤ 34      |                       |
| Reflections collected             | 6090                                        |                       |
| Independent reflections           | 2973 [R(int) = 0.0213]                      |                       |
| Completeness to theta = 74.14°    | 96.8 %                                      |                       |
| Absorption correction             | Semi-empirical from equivalents             |                       |
| Max. and min. transmission        | 1 and 0.35460                               |                       |
| Refinement method                 | Full-matrix least-squares on F <sup>2</sup> |                       |
| Data / restraints / parameters    | 2973 / 0 / 210                              |                       |
| Goodness-of-fit on F <sup>2</sup> | 1.050                                       |                       |
| Final R indices [I > 2σ(I)]       | R1 = 0.0350, wR2 = 0.0908                   |                       |
| R indices (all data)              | R1 = 0.0365, wR2 = 0.0919                   |                       |
| Absolute structure parameter      | -0.7(18)                                    |                       |
| Extinction coefficient            | 0.0059(5)                                   |                       |
| Largest diff. peak and hole       | 0.186 and -0.185 e.Å <sup>-3</sup>          |                       |

Table 2. Atomic coordinates ( $\times 10^4$ ) and equivalent isotropic displacement parameters ( $\text{\AA}^2 \times 10^3$ ) for 2. U(eq) is defined as one third of the trace of the orthogonalized  $U^{ij}$  tensor.

|        | x        | y        | z       | U(eq) |
|--------|----------|----------|---------|-------|
| C(8)   | 5774(2)  | 1340(1)  | 3553(1) | 24(1) |
| C(12)  | 4960(3)  | 531(1)   | 3177(1) | 28(1) |
| C(9)   | 7610(3)  | 2236(1)  | 3471(1) | 24(1) |
| C(10)  | 8466(3)  | 3086(1)  | 3873(1) | 27(1) |
| C(15)  | 8689(3)  | 2298(1)  | 3006(1) | 27(1) |
| C(2)   | 6592(3)  | 626(2)   | 4392(1) | 29(1) |
| C(11)  | 9028(3)  | 2640(2)  | 4318(1) | 30(1) |
| C(7)   | 4789(3)  | 1244(1)  | 4062(1) | 28(1) |
| C(16)  | 8612(3)  | 4518(1)  | 3773(1) | 29(1) |
| C(1A)  | 8634(3)  | 1326(2)  | 4513(1) | 30(1) |
| C(17B) | 6802(3)  | 5116(1)  | 3514(1) | 32(1) |
| C(13C) | 6004(3)  | 631(1)   | 2724(1) | 32(1) |
| C(23D) | 10777(3) | 3159(1)  | 2901(1) | 34(1) |
| C(14E) | 7850(3)  | 1489(1)  | 2643(1) | 31(1) |
| C(18F) | 6778(3)  | 6456(2)  | 3443(1) | 37(1) |
| C(6G)  | 10206(3) | 799(2)   | 4852(1) | 37(1) |
| C(3H)  | 6271(3)  | -614(2)  | 4585(1) | 36(1) |
| C(21I) | 10434(3) | 5291(2)  | 3954(1) | 37(1) |
| C(19J) | 8581(3)  | 7216(2)  | 3629(1) | 40(1) |
| C(22K) | 2955(3)  | -417(2)  | 3256(1) | 36(1) |
| C(20L) | 10402(3) | 6634(2)  | 3881(1) | 42(1) |
| C(4M)  | 7903(3)  | -1140(2) | 4905(1) | 46(1) |
| C(5N)  | 9870(3)  | -432(2)  | 5043(1) | 46(1) |

Table 3. Bond lengths [Å] and angles [°] for 2.

|               |            |
|---------------|------------|
| C(8)-C(12)    | 1.404(2)   |
| C(8)-C(9)     | 1.4078(19) |
| C(8)-C(7)     | 1.509(2)   |
| C(12)-C(13C)  | 1.383(2)   |
| C(12)-C(22K)  | 1.512(2)   |
| C(9)-C(15)    | 1.417(2)   |
| C(9)-C(10)    | 1.489(2)   |
| C(10)-C(11)   | 1.345(2)   |
| C(10)-C(16)   | 1.498(2)   |
| C(15)-C(14E)  | 1.384(2)   |
| C(15)-C(23D)  | 1.506(2)   |
| C(2)-C(3H)    | 1.392(2)   |
| C(2)-C(1A)    | 1.402(2)   |
| C(2)-C(7)     | 1.507(2)   |
| C(11)-C(1A)   | 1.469(2)   |
| C(11)-H(11A)  | 0.9500     |
| C(7)-H(7A)    | 0.9900     |
| C(7)-H(7B)    | 0.9900     |
| C(16)-C(17B)  | 1.392(2)   |
| C(16)-C(21I)  | 1.395(2)   |
| C(1A)-C(6G)   | 1.398(2)   |
| C(17B)-C(18F) | 1.391(2)   |
| C(17B)-H(17A) | 0.9500     |
| C(13C)-C(14E) | 1.386(2)   |
| C(13C)-H(13A) | 0.9500     |
| C(23D)-H(23A) | 0.9800     |
| C(23D)-H(23B) | 0.9800     |
| C(23D)-H(23C) | 0.9800     |
| C(14E)-H(14A) | 0.9500     |
| C(18F)-C(19J) | 1.384(2)   |
| C(18F)-H(18A) | 0.9500     |
| C(6G)-C(5N)   | 1.382(3)   |
| C(6G)-H(6GA)  | 0.9500     |
| C(3H)-C(4M)   | 1.386(2)   |
| C(3H)-H(3HA)  | 0.9500     |
| C(21I)-C(20L) | 1.395(2)   |

|                     |            |
|---------------------|------------|
| C(21I)-H(21A)       | 0.9500     |
| C(19J)-C(20L)       | 1.379(3)   |
| C(19J)-H(19A)       | 0.9500     |
| C(22K)-H(22A)       | 0.9800     |
| C(22K)-H(22B)       | 0.9800     |
| C(22K)-H(22C)       | 0.9800     |
| C(20L)-H(20A)       | 0.9500     |
| C(4M)-C(5N)         | 1.384(3)   |
| C(4M)-H(4MA)        | 0.9500     |
| C(5N)-H(5NA)        | 0.9500     |
|                     |            |
| C(12)-C(8)-C(9)     | 120.80(13) |
| C(12)-C(8)-C(7)     | 121.41(12) |
| C(9)-C(8)-C(7)      | 117.74(13) |
| C(13C)-C(12)-C(8)   | 118.54(13) |
| C(13C)-C(12)-C(22K) | 119.87(14) |
| C(8)-C(12)-C(22K)   | 121.58(14) |
| C(8)-C(9)-C(15)     | 119.54(13) |
| C(8)-C(9)-C(10)     | 120.38(13) |
| C(15)-C(9)-C(10)    | 120.06(13) |
| C(11)-C(10)-C(9)    | 123.44(14) |
| C(11)-C(10)-C(16)   | 119.19(13) |
| C(9)-C(10)-C(16)    | 117.33(13) |
| C(14E)-C(15)-C(9)   | 118.39(13) |
| C(14E)-C(15)-C(23D) | 118.98(14) |
| C(9)-C(15)-C(23D)   | 122.57(14) |
| C(3H)-C(2)-C(1A)    | 119.16(15) |
| C(3H)-C(2)-C(7)     | 121.74(14) |
| C(1A)-C(2)-C(7)     | 119.09(13) |
| C(10)-C(11)-C(1A)   | 127.52(14) |
| C(10)-C(11)-H(11A)  | 116.2      |
| C(1A)-C(11)-H(11A)  | 116.2      |
| C(2)-C(7)-C(8)      | 109.54(12) |
| C(2)-C(7)-H(7A)     | 109.8      |
| C(8)-C(7)-H(7A)     | 109.8      |
| C(2)-C(7)-H(7B)     | 109.8      |
| C(8)-C(7)-H(7B)     | 109.8      |
| H(7A)-C(7)-H(7B)    | 108.2      |

|                      |            |
|----------------------|------------|
| C(17B)-C(16)-C(21I)  | 118.49(14) |
| C(17B)-C(16)-C(10)   | 119.06(13) |
| C(21I)-C(16)-C(10)   | 122.34(15) |
| C(6G)-C(1A)-C(2)     | 119.03(15) |
| C(6G)-C(1A)-C(11)    | 120.10(15) |
| C(2)-C(1A)-C(11)     | 120.68(14) |
| C(18F)-C(17B)-C(16)  | 121.07(15) |
| C(18F)-C(17B)-H(17A) | 119.5      |
| C(16)-C(17B)-H(17A)  | 119.5      |
| C(12)-C(13C)-C(14E)  | 121.02(14) |
| C(12)-C(13C)-H(13A)  | 119.5      |
| C(14E)-C(13C)-H(13A) | 119.5      |
| C(15)-C(23D)-H(23A)  | 109.5      |
| C(15)-C(23D)-H(23B)  | 109.5      |
| H(23A)-C(23D)-H(23B) | 109.5      |
| C(15)-C(23D)-H(23C)  | 109.5      |
| H(23A)-C(23D)-H(23C) | 109.5      |
| H(23B)-C(23D)-H(23C) | 109.5      |
| C(15)-C(14E)-C(13C)  | 121.67(14) |
| C(15)-C(14E)-H(14A)  | 119.2      |
| C(13C)-C(14E)-H(14A) | 119.2      |
| C(19J)-C(18F)-C(17B) | 120.00(16) |
| C(19J)-C(18F)-H(18A) | 120.0      |
| C(17B)-C(18F)-H(18A) | 120.0      |
| C(5N)-C(6G)-C(1A)    | 121.27(16) |
| C(5N)-C(6G)-H(6GA)   | 119.4      |
| C(1A)-C(6G)-H(6GA)   | 119.4      |
| C(4M)-C(3H)-C(2)     | 120.72(16) |
| C(4M)-C(3H)-H(3HA)   | 119.6      |
| C(2)-C(3H)-H(3HA)    | 119.6      |
| C(20L)-C(21I)-C(16)  | 120.13(17) |
| C(20L)-C(21I)-H(21A) | 119.9      |
| C(16)-C(21I)-H(21A)  | 119.9      |
| C(20L)-C(19J)-C(18F) | 119.51(15) |
| C(20L)-C(19J)-H(19A) | 120.2      |
| C(18F)-C(19J)-H(19A) | 120.2      |
| C(12)-C(22K)-H(22A)  | 109.5      |
| C(12)-C(22K)-H(22B)  | 109.5      |

|                      |            |
|----------------------|------------|
| H(22A)-C(22K)-H(22B) | 109.5      |
| C(12)-C(22K)-H(22C)  | 109.5      |
| H(22A)-C(22K)-H(22C) | 109.5      |
| H(22B)-C(22K)-H(22C) | 109.5      |
| C(19J)-C(20L)-C(21I) | 120.79(16) |
| C(19J)-C(20L)-H(20A) | 119.6      |
| C(21I)-C(20L)-H(20A) | 119.6      |
| C(5N)-C(4M)-C(3H)    | 120.41(17) |
| C(5N)-C(4M)-H(4MA)   | 119.8      |
| C(3H)-C(4M)-H(4MA)   | 119.8      |
| C(6G)-C(5N)-C(4M)    | 119.23(16) |
| C(6G)-C(5N)-H(5NA)   | 120.4      |
| C(4M)-C(5N)-H(5NA)   | 120.4      |

---

Symmetry transformations used to generate equivalent atoms:

Table 4. Anisotropic displacement parameters ( $\text{\AA}^2 \times 10^3$ ) for 2. The anisotropic displacement factor exponent takes the form:  $-2\pi^2 [h^2 a^{*2} U^{11} + \dots + 2 h k a^* b^* U^{12}]$

|        | $U^{11}$ | $U^{22}$ | $U^{33}$ | $U^{23}$ | $U^{13}$ | $U^{12}$ |
|--------|----------|----------|----------|----------|----------|----------|
| C(8)   | 22(1)    | 18(1)    | 33(1)    | 3(1)     | 0(1)     | 3(1)     |
| C(12)  | 29(1)    | 15(1)    | 39(1)    | 1(1)     | -2(1)    | 1(1)     |
| C(9)   | 22(1)    | 18(1)    | 32(1)    | 3(1)     | 2(1)     | 2(1)     |
| C(10)  | 18(1)    | 26(1)    | 38(1)    | -3(1)    | 5(1)     | -3(1)    |
| C(15)  | 27(1)    | 17(1)    | 37(1)    | 3(1)     | 6(1)     | 4(1)     |
| C(2)   | 23(1)    | 36(1)    | 28(1)    | 4(1)     | 6(1)     | -1(1)    |
| C(11)  | 19(1)    | 34(1)    | 36(1)    | -5(1)    | 2(1)     | -4(1)    |
| C(7)   | 21(1)    | 29(1)    | 34(1)    | 2(1)     | 2(1)     | -3(1)    |
| C(16)  | 25(1)    | 23(1)    | 39(1)    | -6(1)    | 5(1)     | -2(1)    |
| C(1A)  | 24(1)    | 40(1)    | 26(1)    | 2(1)     | 6(1)     | -1(1)    |
| C(17B) | 24(1)    | 24(1)    | 48(1)    | -7(1)    | 2(1)     | -4(1)    |
| C(13C) | 41(1)    | 20(1)    | 36(1)    | -5(1)    | -2(1)    | 3(1)     |
| C(23D) | 32(1)    | 24(1)    | 47(1)    | 5(1)     | 13(1)    | 2(1)     |
| C(14E) | 40(1)    | 21(1)    | 33(1)    | 2(1)     | 8(1)     | 7(1)     |
| C(18F) | 31(1)    | 24(1)    | 55(1)    | -4(1)    | 2(1)     | 1(1)     |
| C(6G)  | 25(1)    | 58(1)    | 27(1)    | 6(1)     | 3(1)     | -1(1)    |
| C(3H)  | 31(1)    | 44(1)    | 35(1)    | 13(1)    | 6(1)     | -6(1)    |
| C(21I) | 28(1)    | 31(1)    | 52(1)    | -4(1)    | 0(1)     | -7(1)    |
| C(19J) | 39(1)    | 22(1)    | 60(1)    | -7(1)    | 9(1)     | -5(1)    |
| C(22K) | 36(1)    | 21(1)    | 51(1)    | 0(1)     | -4(1)    | -5(1)    |
| C(20L) | 37(1)    | 31(1)    | 59(1)    | -9(1)    | 0(1)     | -14(1)   |
| C(4M)  | 40(1)    | 57(1)    | 41(1)    | 27(1)    | 5(1)     | -4(1)    |
| C(5N)  | 33(1)    | 74(1)    | 31(1)    | 22(1)    | 3(1)     | 2(1)     |

Table 5. Hydrogen coordinates ( $\times 10^4$ ) and isotropic displacement parameters ( $\text{\AA}^2 \times 10^{-3}$ ) for 2.

|        | x     | y     | z    | U(eq) |
|--------|-------|-------|------|-------|
| H(11A) | 9764  | 3243  | 4531 | 36    |
| H(7A)  | 4386  | 2123  | 4184 | 33    |
| H(7B)  | 3332  | 713   | 4059 | 33    |
| H(17A) | 5563  | 4600  | 3384 | 38    |
| H(13A) | 5448  | 104   | 2464 | 39    |
| H(23A) | 11245 | 3057  | 2560 | 51    |
| H(23B) | 12095 | 2912  | 3113 | 51    |
| H(23C) | 10350 | 4069  | 2962 | 51    |
| H(14A) | 8558  | 1523  | 2329 | 38    |
| H(18A) | 5525  | 6849  | 3267 | 44    |
| H(6GA) | 11531 | 1296  | 4953 | 44    |
| H(3HA) | 4918  | -1106 | 4496 | 43    |
| H(21A) | 11700 | 4902  | 4128 | 44    |
| H(19A) | 8564  | 8133  | 3584 | 48    |
| H(22A) | 2646  | -891  | 2953 | 54    |
| H(22B) | 1535  | 61    | 3353 | 54    |
| H(22C) | 3384  | -1036 | 3512 | 54    |
| H(20A) | 11648 | 7154  | 4006 | 51    |
| H(4MA) | 7670  | -1992 | 5031 | 55    |
| H(5NA) | 10977 | -787  | 5266 | 55    |

## The HRMS spectra of the new products

### 1. The HRMS Spectra of **3a**

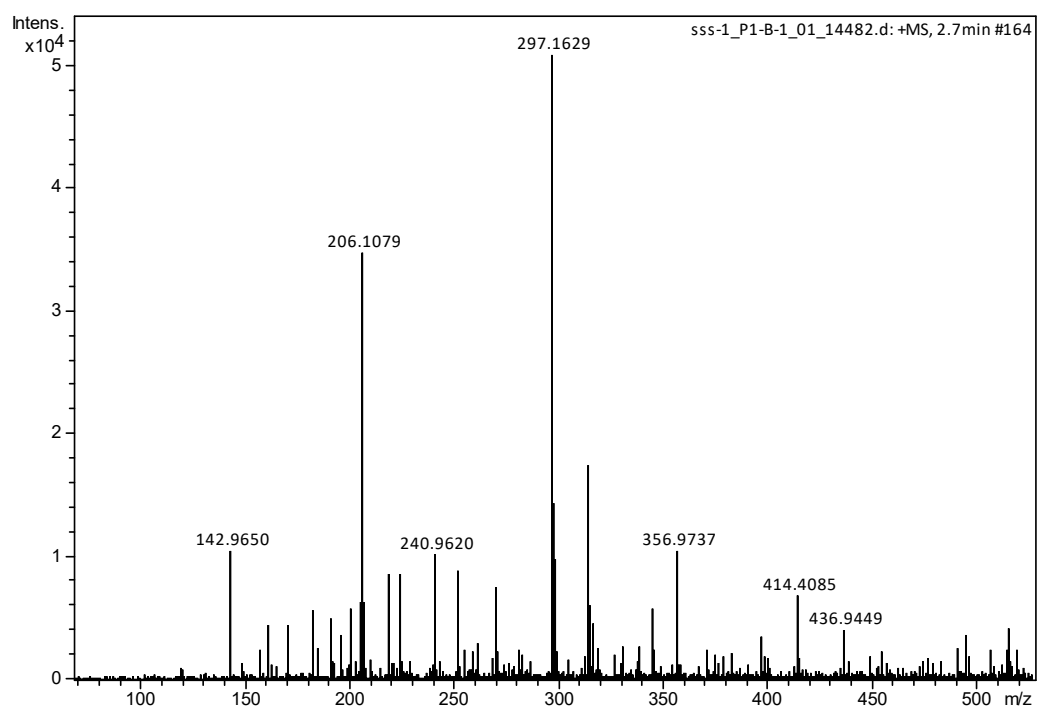

### 2. The HRMS Spectra of **3b**

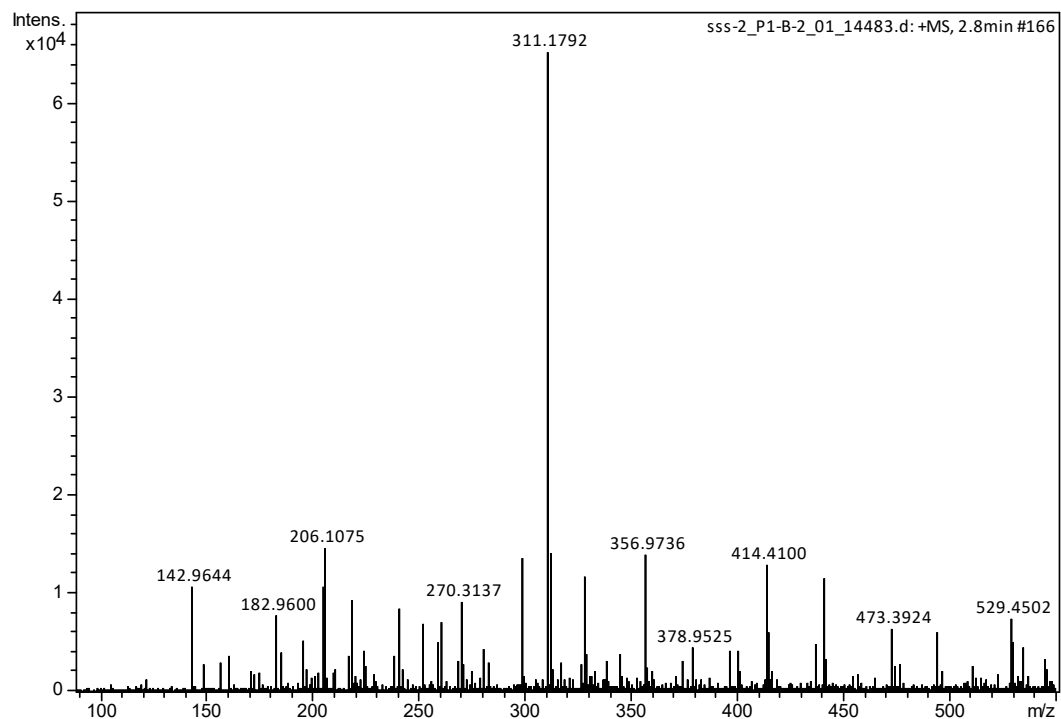

### 3. The HRMS Spectra of **3c**

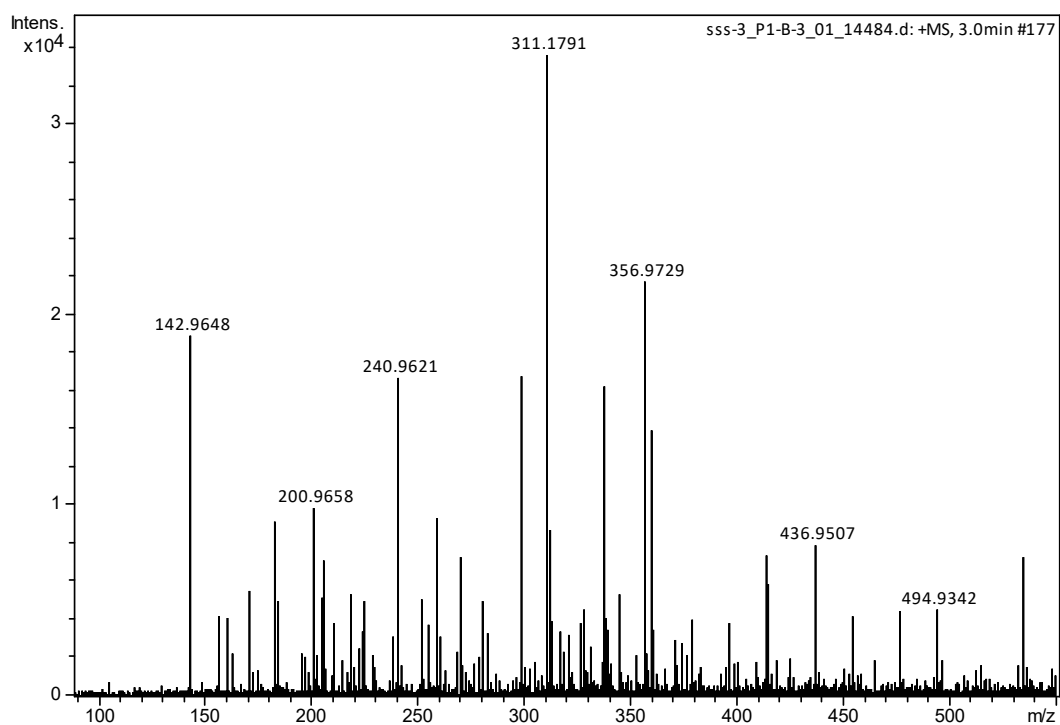

#### 4. The HRMS Spectra of **3d**

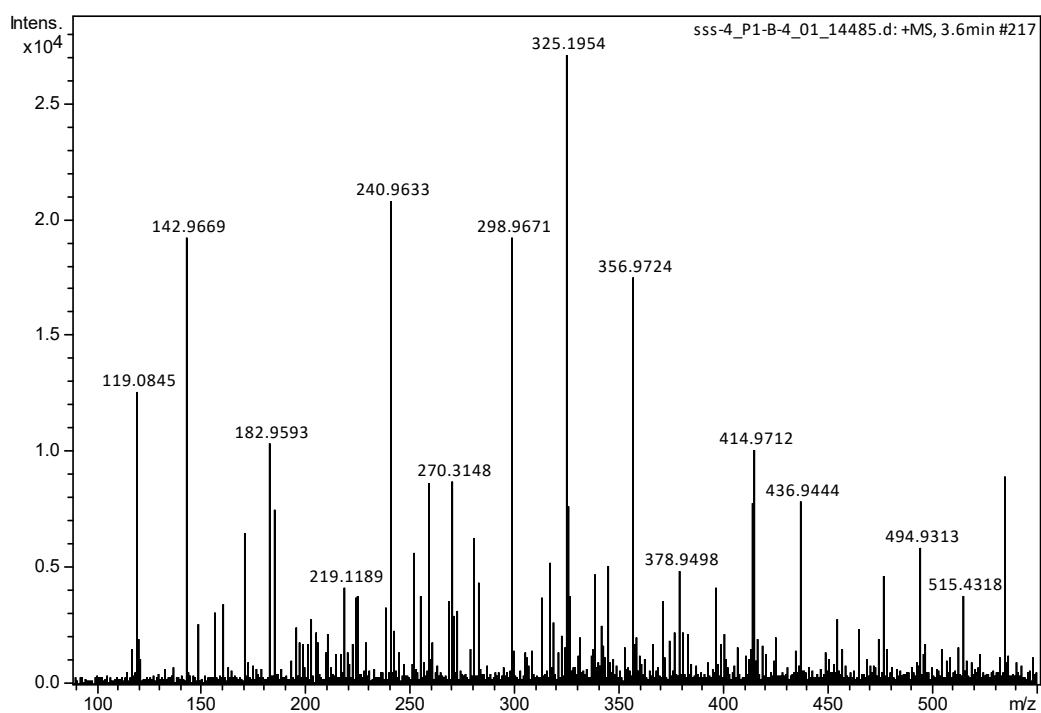

#### 5. The HRMS Spectra of **3e**

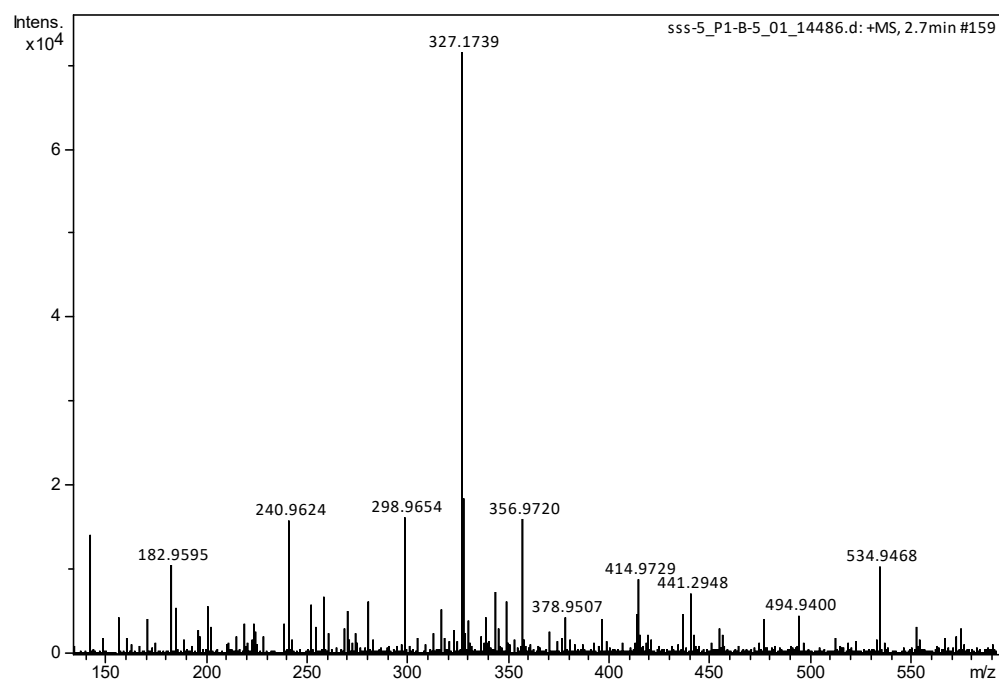

#### 6. The HRMS Spectra of **3f**

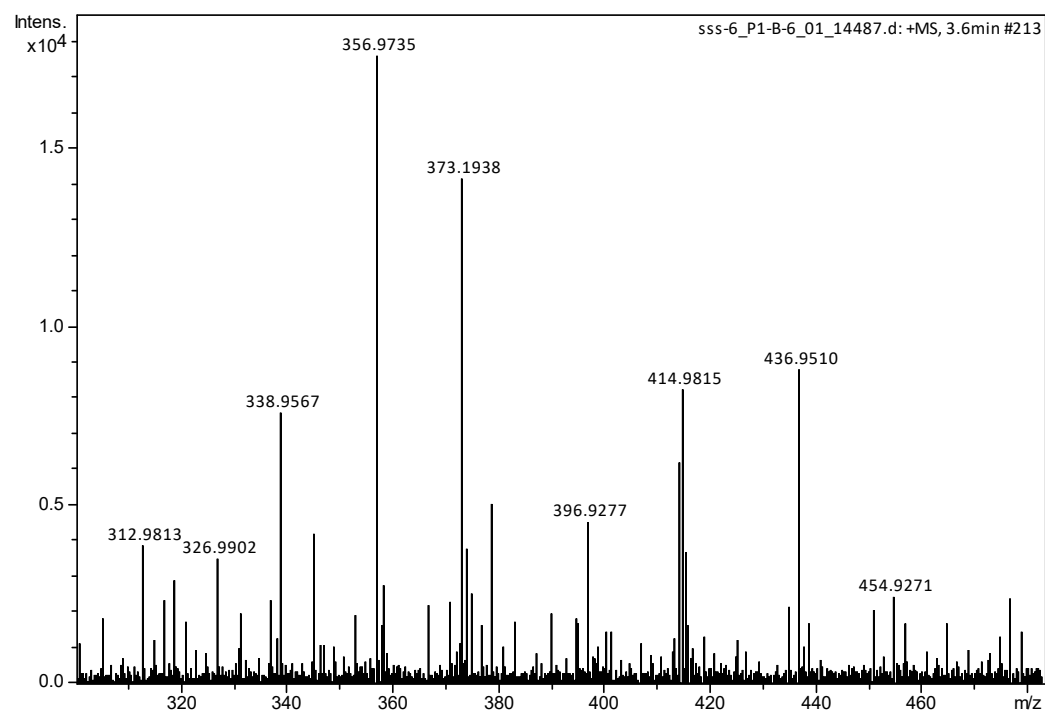

#### 7. The HRMS Spectra of **3g**

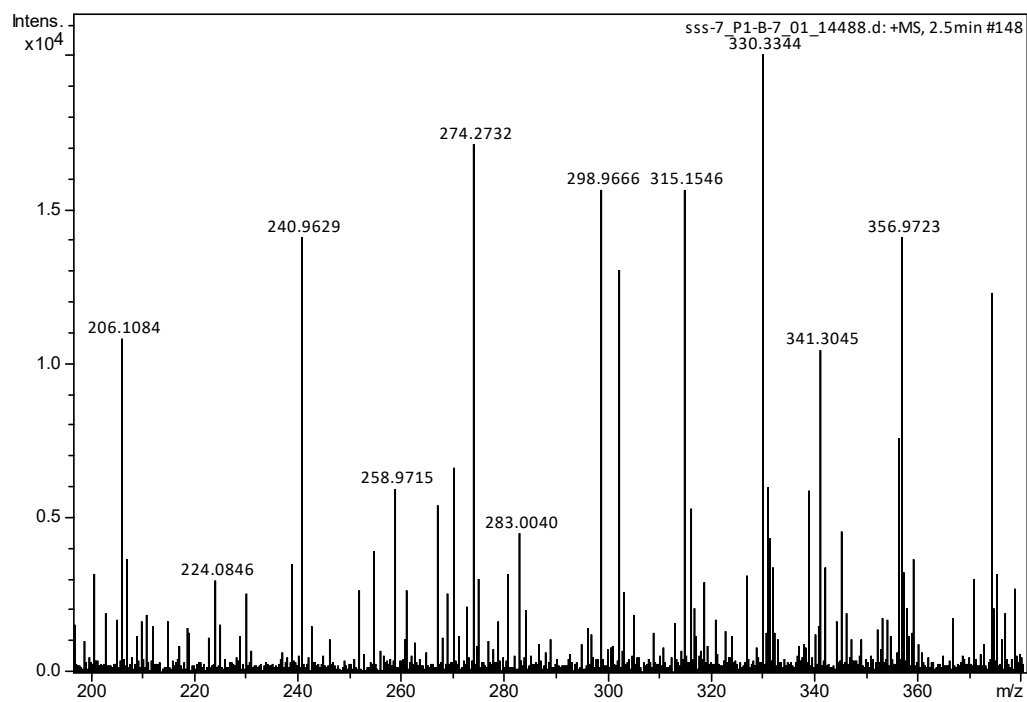

#### 8. The HRMS Spectra of **3h**

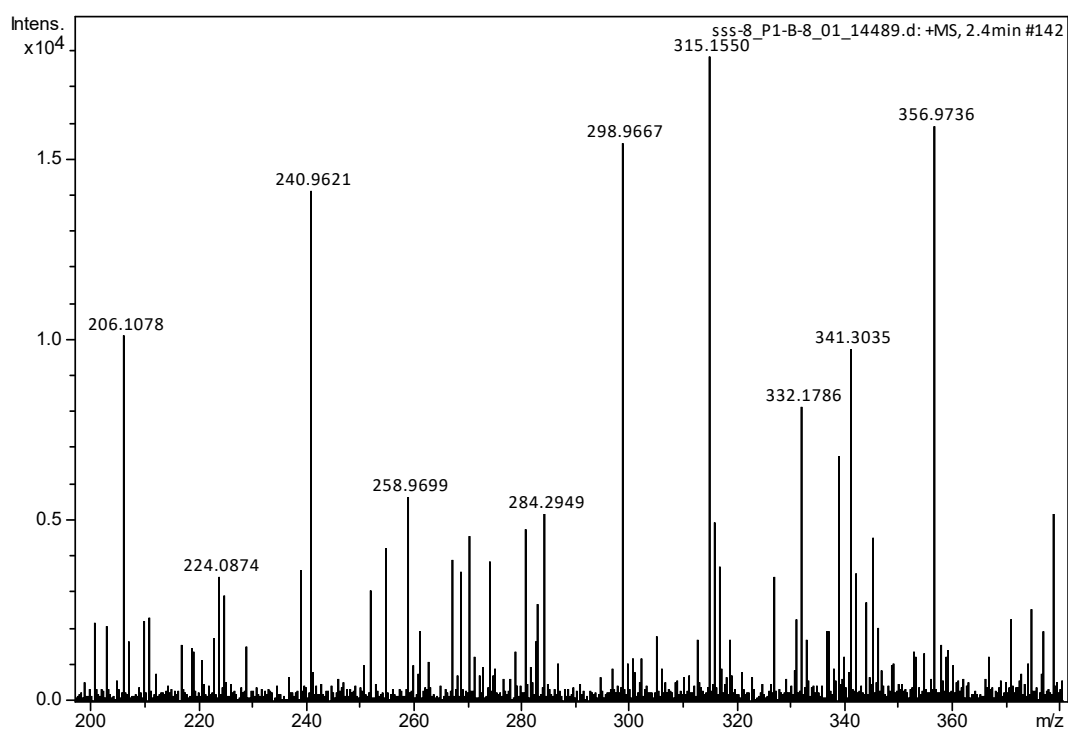

#### 9. The HRMS Spectra of **3j**

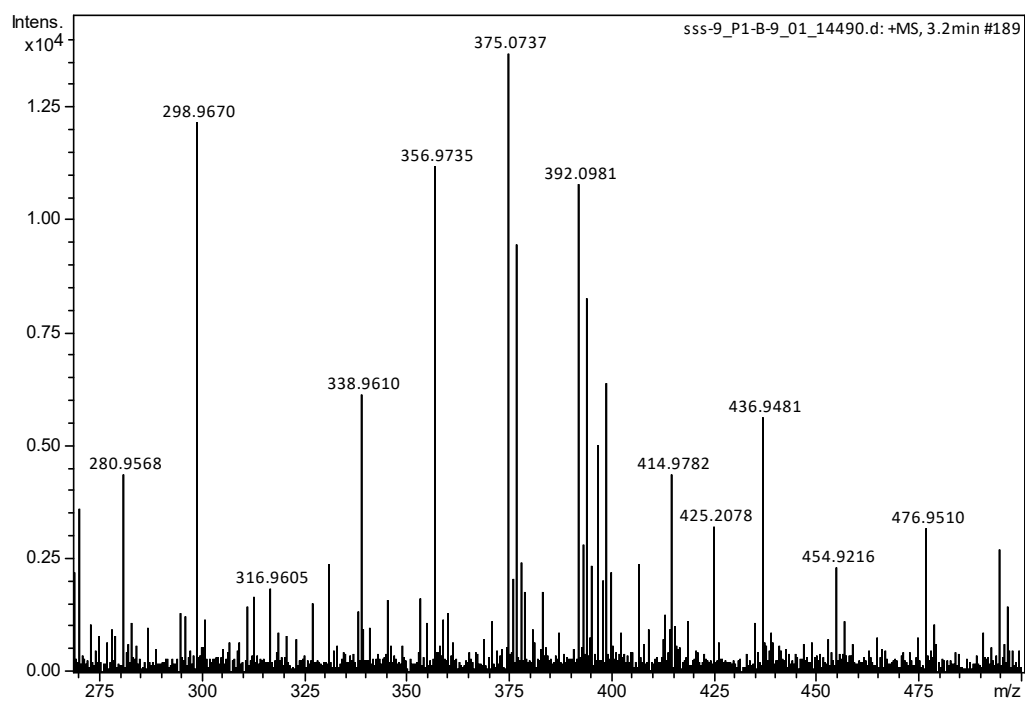

10. The HRMS Spectra of **3i**

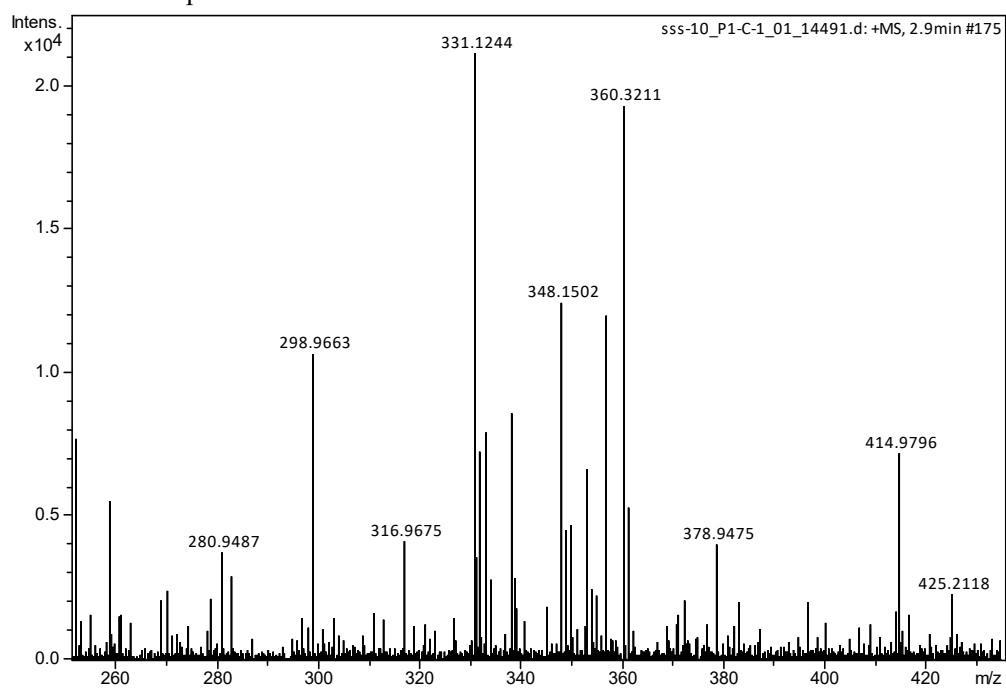

11. The HRMS Spectra of **3k**

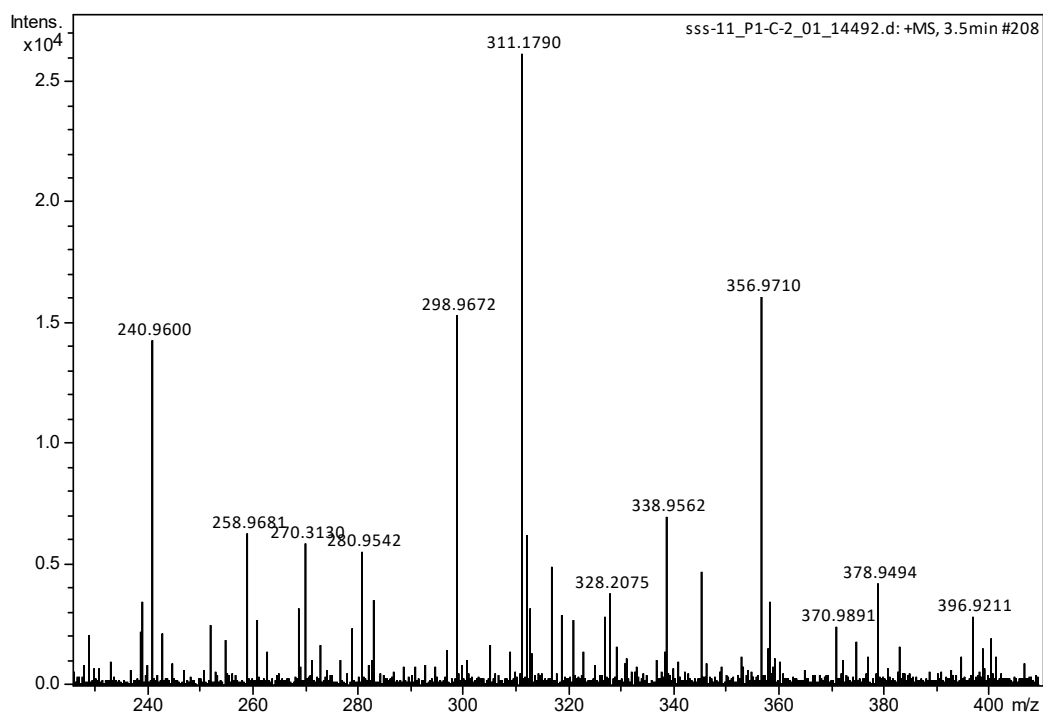

## 12. The HRMS Spectra of **31**

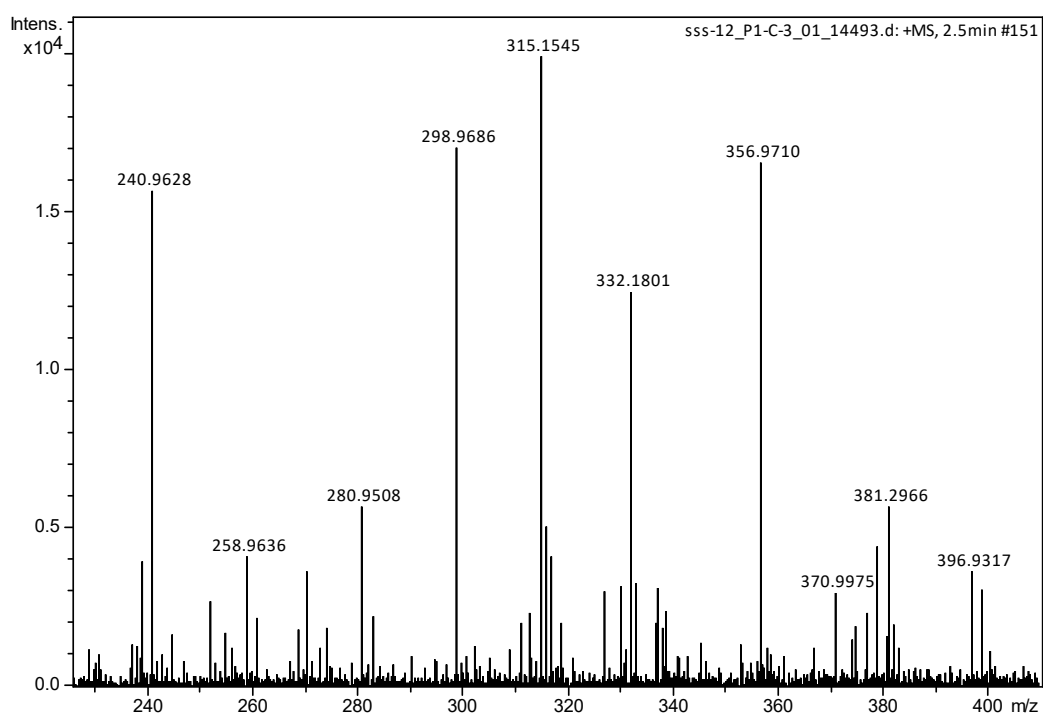

## 13. The HRMS Spectra of **3m**

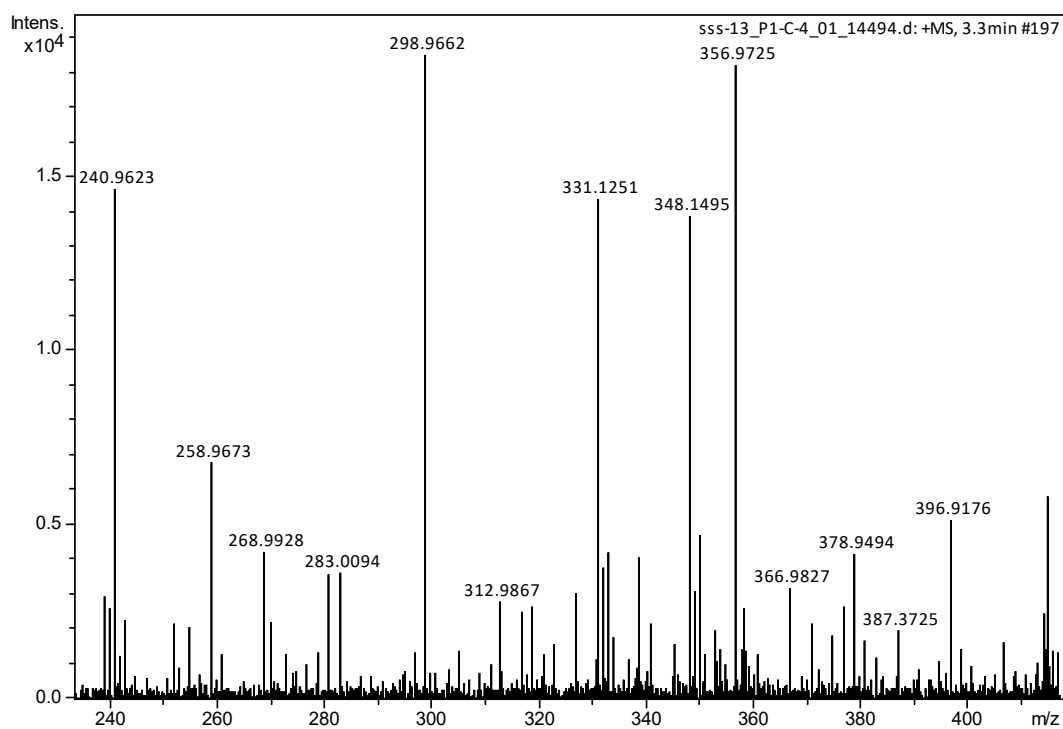

14. The HRMS Spectra of **3n**

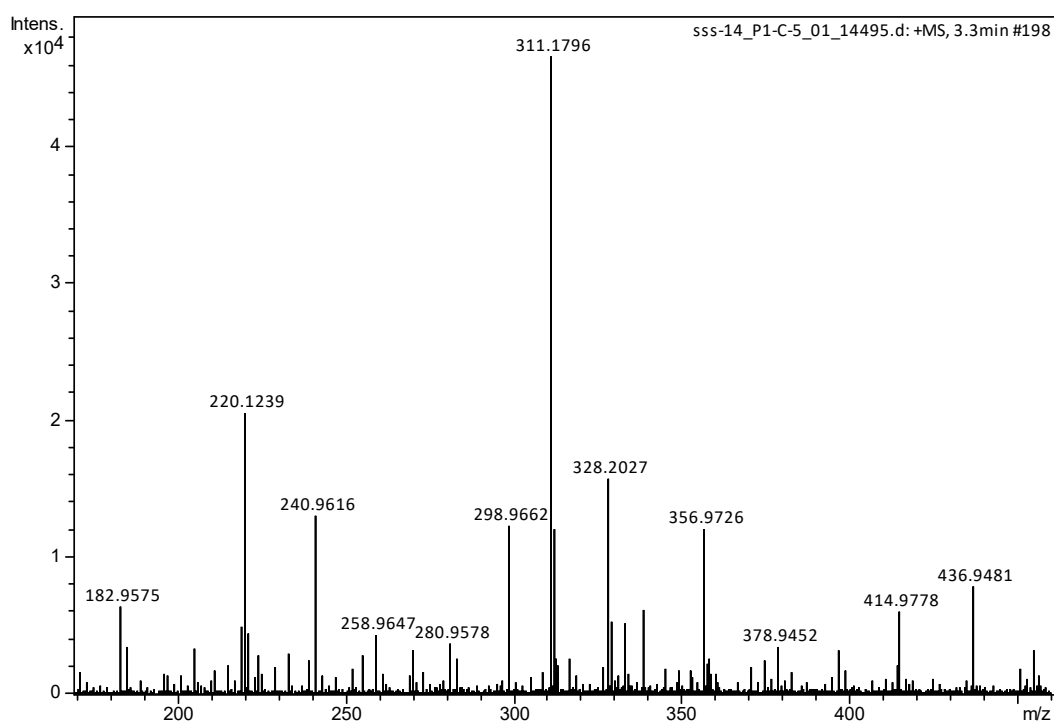

15. The HRMS Spectra of **3o**

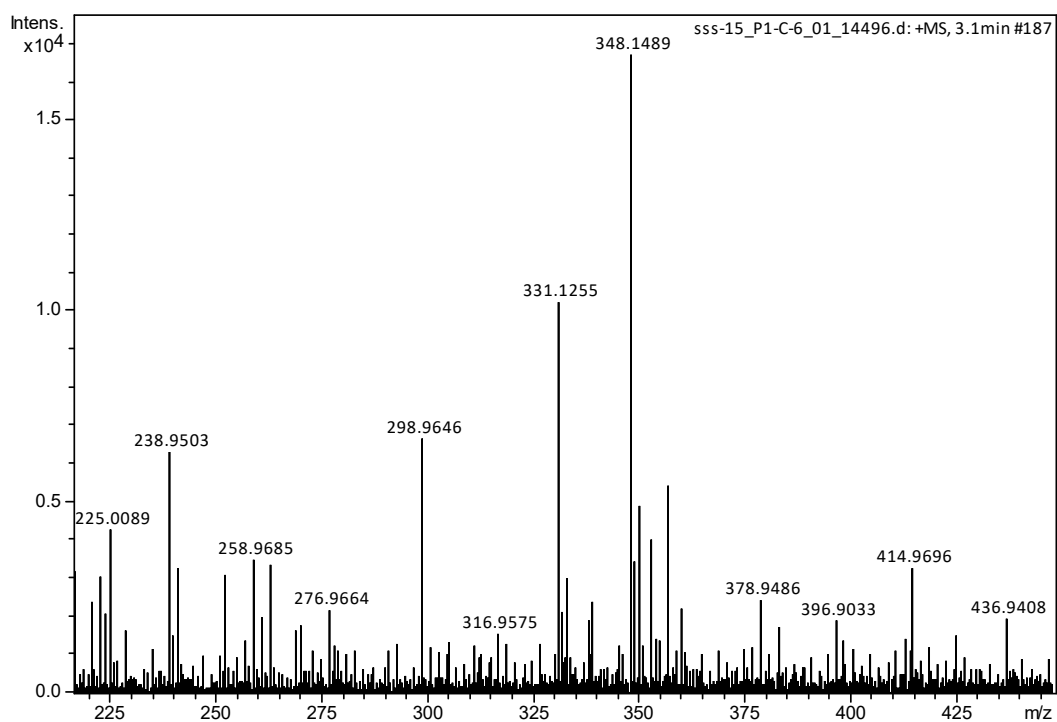

#### 16. The HRMS Spectra of **3p**

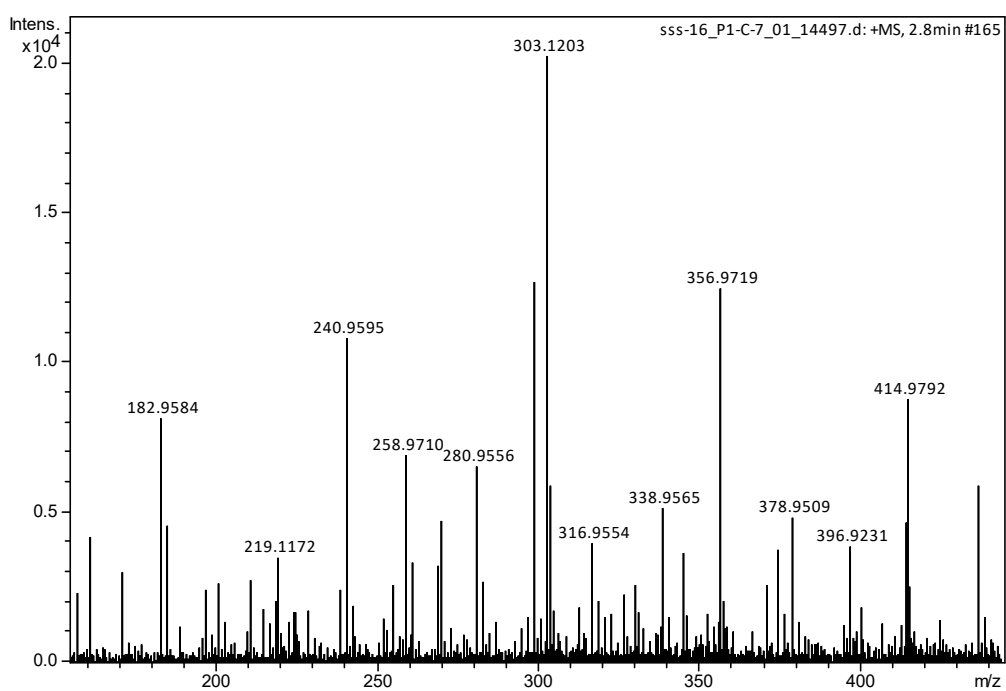

#### 17. The HRMS Spectra of **3s**

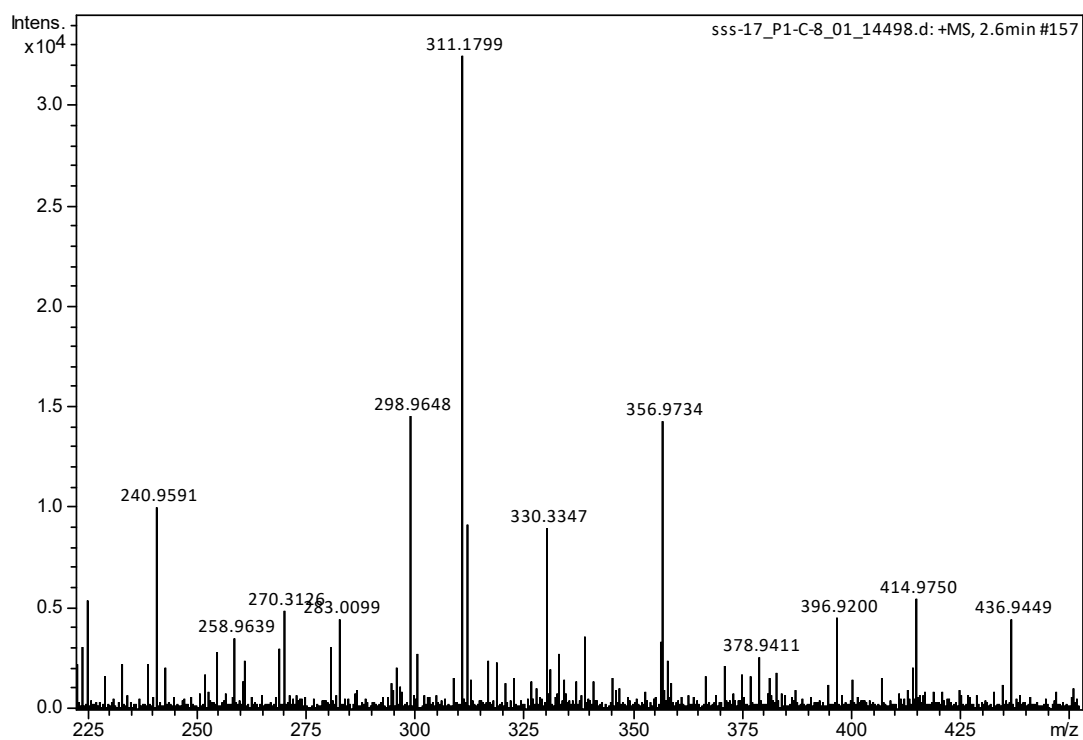

18. The HRMS Spectra of **5**

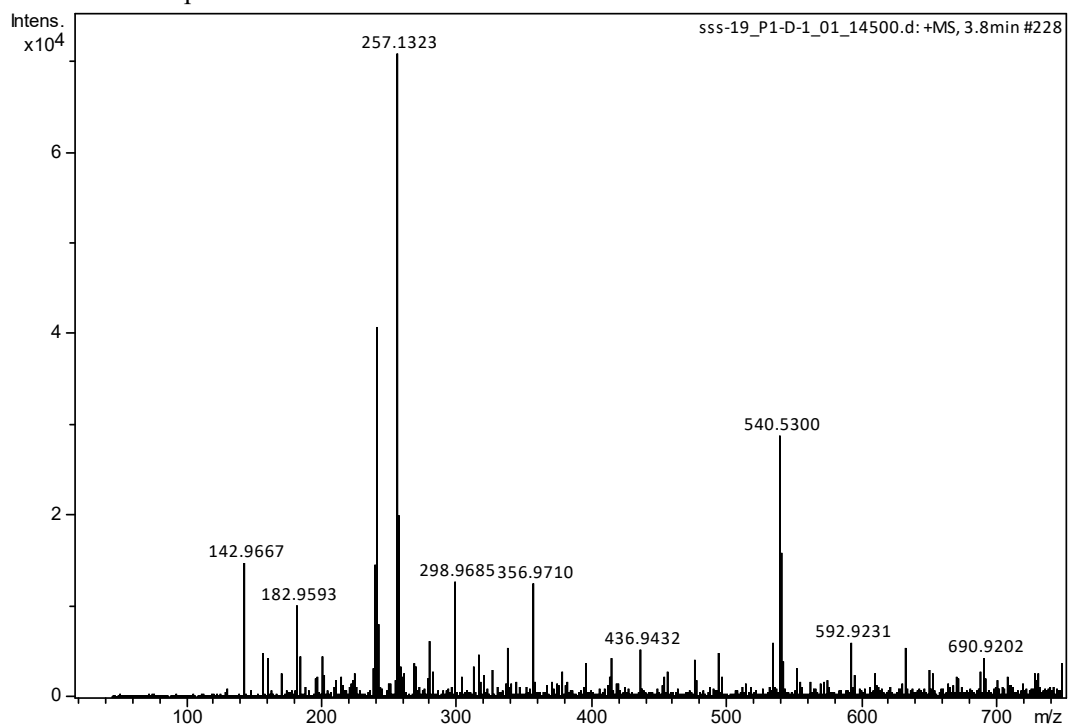

20. The HRMS Spectra of **3ba**

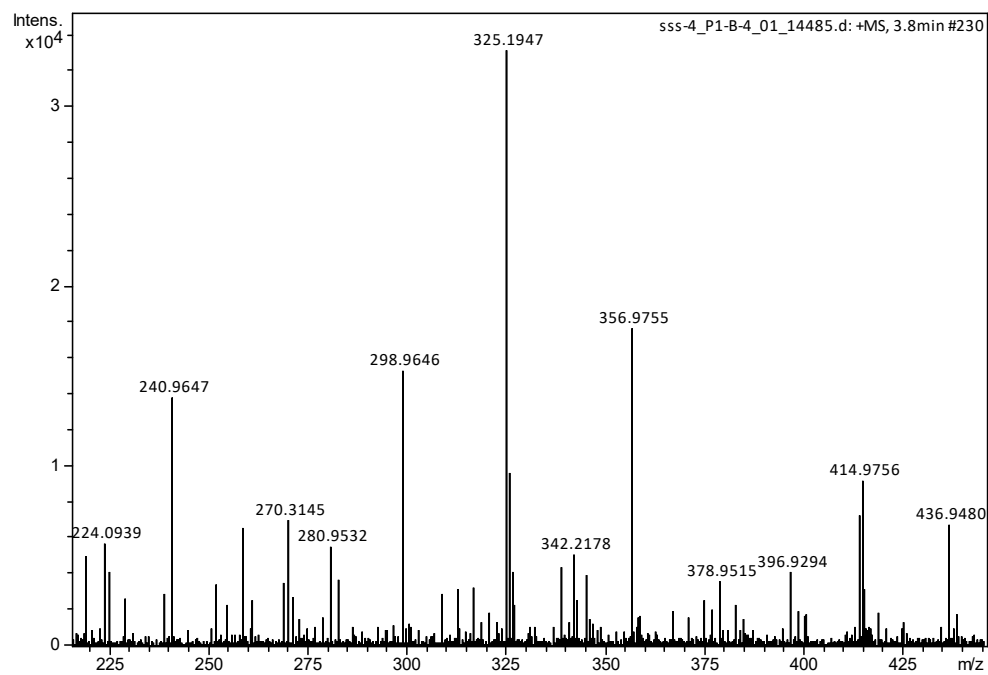

21. The HRMS Spectra of **3ca**

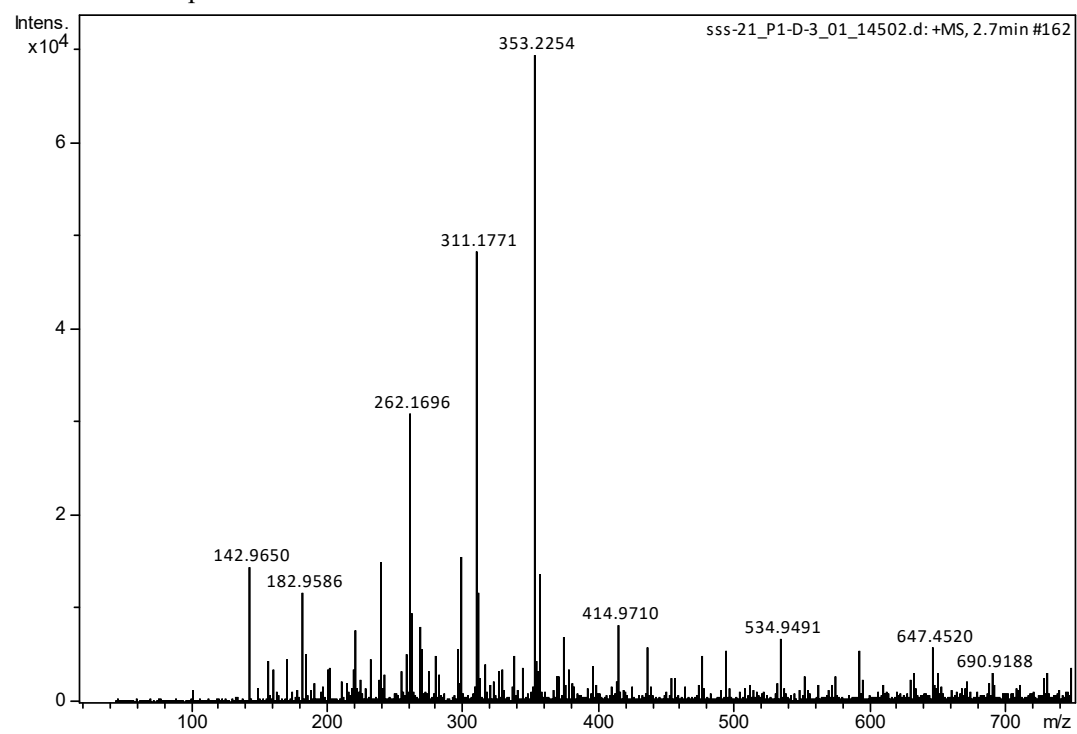

22. The HRMS Spectra of **3da**

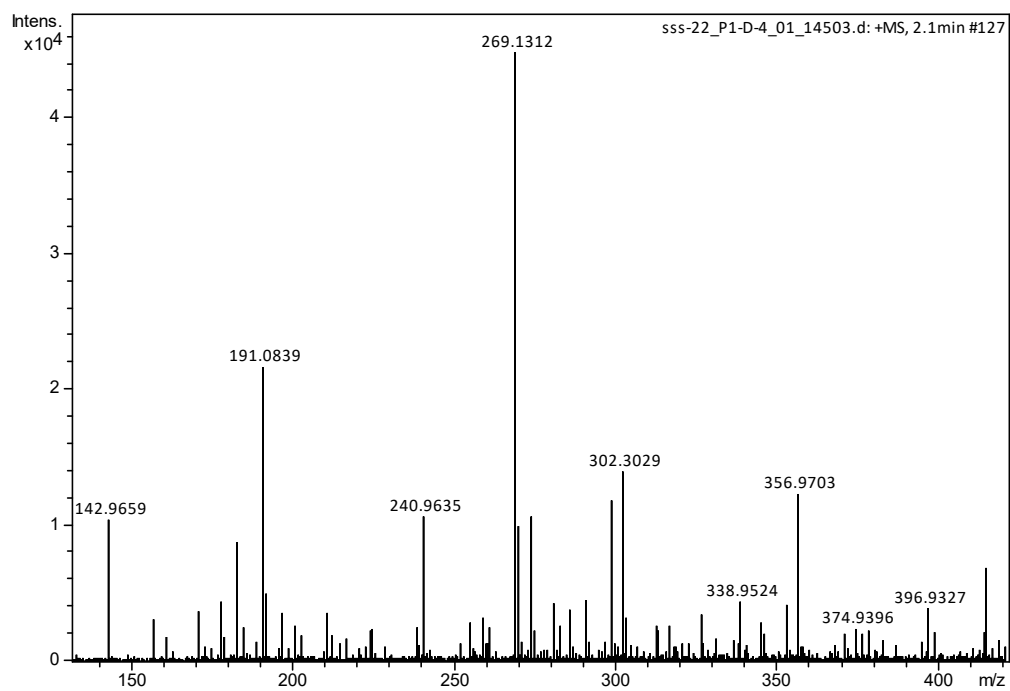

23. The HRMS Spectra of **4a**

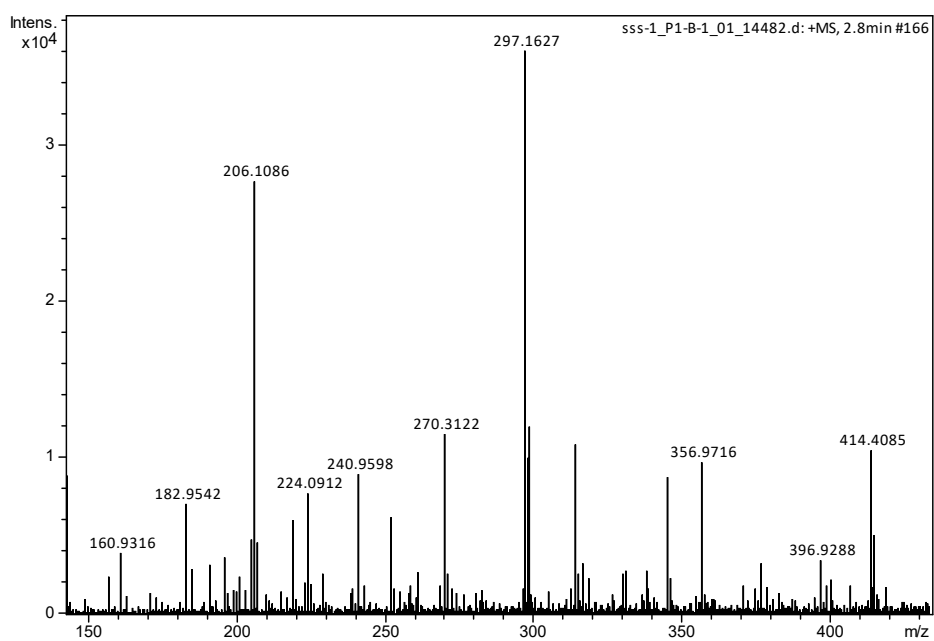

24. The HRMS Spectra of **4q**

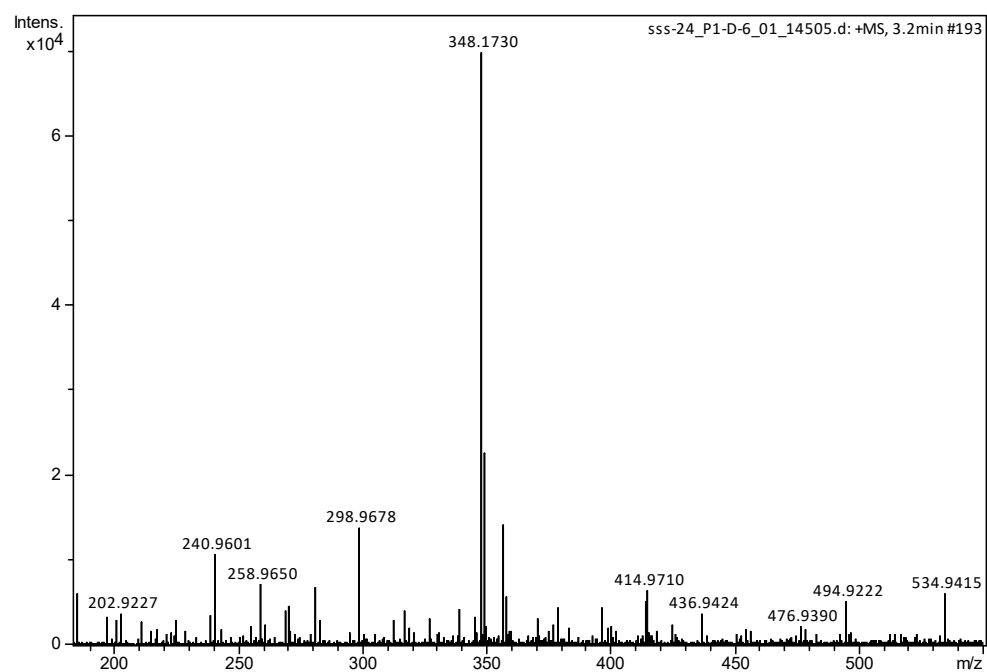

Supplement: d2ob01335e1.pdf [file d2ob01335e1.pdf]
